# Supplementary material for: Water adsorption on MoS2 under realistic atmosphere conditions and impacts on tribology
Source: Royal Society of Chemistry journal article supplement (doi:10.1039/d3ra07984h), 2024-01-01
Supplement: d3ra07984h1.xlsx [file d3ra07984h1.xlsx]

## Sheet: bulk
Bulk MoS2 with defcts
	278k	0% defects		0.5% defects		1.0% defects		1.5% defects		2.0% defects		4.0% defects		10% defects
	MOL/KG
%RH	tip3p	Uptake	err +/-	Uptake	err +/-	Uptake	err +/-	Uptake	err +/-	Uptake	err +/-	Uptake	err +/-	Uptake	err +/-
0		0	0	0	0	0	0	0	0	0	0	0	0	0	0
0.0116767		0	0	0.0625992	0	0.12545	0	0.183711	0.0111374	0.250665	0.0049945	0.507914	6.39675e-05	1.20821	0.00786242
0.116766		0	0	0.0625992	0	0.12545	0	0.188554	0	0.251914	0	0.50793	0	1.25821	0.0147856
0.583806		0	0	0.0625992	0	0.12545	0	0.188554	0	0.251914	0	0.50793	0	1.27645	0.0107689
1.16755		0	0	0.0625992	0	0.12545	0	0.188554	0	0.251914	0	0.50793	0	1.2787	0.00681027
2.33487		0	0	0.0625992	0	0.12545	0	0.188554	0	0.251914	0	0.50793	0	1.28622	0.00272326
3.50196		0	0	0.0625992	0	0.12545	0	0.188554	0	0.251914	0	0.50793	0	1.28416	0.00283738
4.66881		0	0	0.0625992	0	0.12545	0	0.188554	0	0.251914	0	0.50793	0	1.28745	0.004473
5.00283		0	0	0.0625992	0	0.12545	0	0.188554	0	0.251914	0	0.50793	0	1.28644	0.00471608
5.83543		0	0	0.0625992	0	0.12545	0	0.188554	0	0.251914	0	0.50793	0	1.28678	0.00079048
10.0057		0	0	0.0625992	0	0.12545	0	0.188554	0	0.251914	0	0.50793	0	1.28855	0.00258666
11.665		0	0	0.0625992	0	0.12545	0	0.188554	0	0.251914	0	0.50793	0	1.29078	0.0036225
13.9952		0	0	0.0625992	0	0.12545	0	0.188554	0	0.251914	0	0.50793	0	1.29111	0.00785478
15.0085		0	0	0.0625992	0	0.12545	0	0.188554	0	0.251914	0	0.50793	0	1.28932	0.00309154
20.0113		0	0	0.0625992	0	0.12545	0	0.188554	0	0.251914	0	0.50793	0	1.29148	0.00293506
25.0142		0	0	0.0625992	0	0.12545	0	0.188554	0	0.251914	0	0.50793	0	1.28939	0.00421208
30.017		0	0	0.0625992	0	0.12545	0	0.188554	0	0.251914	0	0.50793	0	1.29175	0.00213893
35.0198		0	0	0.0625992	0	0.12545	0	0.188554	0	0.251914	0	0.50793	0	1.29421	0.00841618
40.0227		0	0	0.0620389	0.00224089	0.12545	0	0.188554	0	0.251914	0	0.50793	0	1.29324	0.00368299
45.0255		0	0	0.0625992	0	0.12545	0	0.188554	0	0.251914	0	0.50793	0	1.29578	0.00565494
50.0283		0	0	0.0625992	0	0.12545	0	0.188554	0	0.251914	0	0.50793	0	1.29567	0.00626709
55.0312		0	0	0.0625992	0	0.12545	0	0.188554	0	0.251914	0	0.50793	0	1.2956	0.00541387
60.034		0	0	0.0625992	0	0.12545	0	0.188554	0	0.251914	0	0.50793	0	1.2942	0.0116099
65.0368		0	0	0.0625992	0	0.12545	0	0.188554	0	0.251914	0	0.50793	0	1.2946	0.00588175
70.0396		0	0	0.0625992	0	0.12545	0	0.188554	0	0.251914	0	0.50793	0	1.2995	0.00574083
75.0425		0	0	0.0625992	0	0.12545	0	0.188554	0	0.251914	0	0.50793	0	1.29772	0.00440315
80.0453		0	0	0.0625992	0	0.12545	0	0.188554	0	0.251914	0	0.50793	0	1.29596	0.00852987
85.0481		0	0	0.0625992	0	0.12545	0	0.188554	0	0.251914	0	0.50793	0	1.29533	0.0105138
90.051		0	0	0.0625992	0	0.12545	0	0.188554	0	0.251914	0	0.50793	0	1.29654	0.0062224
95.0538		0	0	0.0625992	0	0.12545	0	0.188554	0	0.251914	0	0.50793	0	1.30142	0.000361908
%RH	N2
0		0	0	0	0	0	0	0	0	0	0	0	0	0	0
0.0116767		0	0	0	0	0	0	0	0	0	0	0	0	0	0
0.116766		0	0	0	0	0	0	0	0	0	0	0	0	0	0
0.583806		0	0	0	0	0	0	0	0	0	0	0	0	0	0
1.16755		0	0	0	0	0	0	0	0	0	0	0	0	0	0
2.33487		0	0	0	0	0	0	0	0	0	0	0	0	0	0
3.50196		0	0	0	0	0	0	0	0	0	0	0	0	0	0
4.66881		0	0	0	0	0	0	0	0	0	0	0	0	0	0
5.00283		0	0	0	0	0	0	0	0	0	0	0	0	0	0
5.83543		0	0	0	0	0	0	0	0	0	0	0	0	0	0
10.0057		0	0	0	0	0	0	0	0	0	0	0	0	0	0
11.665		0	0	0	0	0	0	0	0	0	0	0	0	0	0
13.9952		0	0	0	0	0	0	0	0	0	0	0	0	0	0
15.0085		0	0	0	0	0	0	0	0	0	0	0	0	0	0
20.0113		0	0	0	0	0	0	0	0	0	0	0	0	0	0
25.0142		0	0	0	0	0	0	0	0	0	0	0	0	0	0
30.017		0	0	0	0	0	0	0	0	0	0	0	0	0	0
35.0198		0	0	0	0	0	0	0	0	0	0	0	0	0	0
40.0227		0	0	0	0	0	0	0	0	0	0	0	0	0	0
45.0255		0	0	0	0	0	0	0	0	0	0	0	0	0	0
50.0283		0	0	0	0	0	0	0	0	0	0	0	0	0	0
55.0312		0	0	0	0	0	0	0	0	0	0	0	0	0	0
60.034		0	0	0	0	0	0	0	0	0	0	0	0	0	0
65.0368		0	0	0	0	0	0	0	0	0	0	0	0	0	0
70.0396		0	0	0	0	0	0	0	0	0	0	0	0	0	0
75.0425		0	0	0	0	0	0	0	0	0	0	0	0	0	0
80.0453		0	0	0	0	0	0	0	0	0	0	0	0	0	0
85.0481		0	0	0	0	0	0	0	0	0	0	0	0	0	0
90.051		0	0	0	0	0	0	0	0	0	0	0	0	0	0
95.0538		0	0	0	0	0	0	0	0	0	0	0	0	0	0
%RH	O2
0		0	0	0	0	0	0	0	0	0	0	0	0	8.14e-08	3.254e-07
0.0116767		0	0	0	0	0	0	0	0	0	0	0	0	0	0
0.116766		0	0	0	0	0	0	0	0	0	0	0	0	0	0
0.583806		0	0	0	0	0	0	0	0	0	0	0	0	0	0
1.16755		0	0	0	0	0	0	0	0	0	0	0	0	0	0
2.33487		0	0	0	0	0	0	0	0	0	0	0	0	0	0
3.50196		0	0	0	0	0	0	0	0	0	0	0	0	0	0
4.66881		0	0	0	0	0	0	0	0	0	0	0	0	0	0
5.00283		0	0	0	0	0	0	0	0	0	0	0	0	0	0
5.83543		0	0	0	0	0	0	0	0	0	0	0	0	0	0
10.0057		0	0	0	0	0	0	0	0	0	0	0	0	0	0
11.665		0	0	0	0	0	0	0	0	0	0	0	0	0	0
13.9952		0	0	0	0	0	0	0	0	0	0	0	0	0	0
15.0085		0	0	0	0	0	0	0	0	0	0	0	0	0	0
20.0113		0	0	0	0	0	0	0	0	0	0	0	0	0	0
25.0142		0	0	0	0	0	0	0	0	0	0	0	0	0	0
30.017		0	0	0	0	0	0	0	0	0	0	0	0	0	0
35.0198		0	0	0	0	0	0	0	0	0	0	0	0	0	0
40.0227		0	0	0	0	0	0	0	0	0	0	0	0	0	0
45.0255		0	0	0	0	0	0	0	0	0	0	0	0	0	0
50.0283		0	0	0	0	0	0	0	0	0	0	0	0	0	0
55.0312		0	0	0	0	0	0	0	0	0	0	0	0	0	0
60.034		0	0	0	0	0	0	0	0	0	0	0	0	0	0
65.0368		0	0	0	0	0	0	0	0	0	0	0	0	0	0
70.0396		0	0	0	0	0	0	0	0	0	0	0	0	0	0
75.0425		0	0	0	0	0	0	0	0	0	0	0	0	0	0
80.0453		0	0	0	0	0	0	0	0	0	0	0	0	0	0
85.0481		0	0	0	0	0	0	0	0	0	0	0	0	0	0
90.051		0	0	0	0	0	0	0	0	0	0	0	0	0	0
95.0538		0	0	0	0	0	0	0	0	0	0	0	0	0	0
%RH	argon
0		0	0	0	0	0	0	0	0	0	0	0	0	0	0
0.0116767		0	0	0	0	0	0	0	0	0	0	0	0	0	0
0.116766		0	0	0	0	0	0	0	0	0	0	0	0	0	0
0.583806		0	0	0	0	0	0	0	0	0	0	0	0	0	0
1.16755		0	0	0	0	0	0	0	0	0	0	0	0	0	0
2.33487		0	0	0	0	0	0	0	0	0	0	0	0	0	0
3.50196		0	0	0	0	0	0	0	0	0	0	0	0	0	0
4.66881		0	0	0	0	0	0	0	0	0	0	0	0	0	0
5.00283		0	0	0	0	0	0	0	0	0	0	0	0	0	0
5.83543		0	0	0	0	0	0	0	0	0	0	0	0	0	0
10.0057		0	0	0	0	0	0	0	0	0	0	0	0	0	0
11.665		0	0	0	0	0	0	0	0	0	0	0	0	0	0
13.9952		0	0	0	0	0	0	0	0	0	0	0	0	0	0
15.0085		0	0	0	0	0	0	0	0	0	0	0	0	0	0
20.0113		0	0	0	0	0	0	0	0	0	0	0	0	0	0
25.0142		0	0	0	0	0	0	0	0	0	0	0	0	0	0
30.017		0	0	0	0	0	0	0	0	0	0	0	0	0	0
35.0198		0	0	0	0	0	0	0	0	0	0	0	0	0	0
40.0227		0	0	0	0	0	0	0	0	0	0	0	0	0	0
45.0255		0	0	0	0	0	0	0	0	0	0	0	0	0	0
50.0283		0	0	0	0	0	0	0	0	0	0	0	0	0	0
55.0312		0	0	0	0	0	0	0	0	0	0	0	0	0	0
60.034		0	0	0	0	0	0	0	0	0	0	0	0	0	0
65.0368		0	0	0	0	0	0	0	0	0	0	0	0	0	0
70.0396		0	0	0	0	0	0	0	0	0	0	0	0	0	0
75.0425		0	0	0	0	0	0	0	0	0	0	0	0	0	0
80.0453		0	0	0	0	0	0	0	0	0	0	0	0	0	0
85.0481		0	0	0	0	0	0	0	0	0	0	0	0	0	0
90.051		0	0	0	0	0	0	0	0	0	0	0	0	0	0
95.0538		0	0	0	0	0	0	0	0	0	0	0	0	0	0
	298k
	MOL/KG
%RH	tip3p
0		0	0	0	0	0	0	0	0	0	0	0	0	0	0
0.00318445		0	0	0.0625992	0	0.12545	0	0.188554	0	0.251914	0	0.507151	0.00290578	1.141	0.0231624
0.0318442		0	0	0.0625992	0	0.12545	0	0.188554	0	0.251914	0	0.507756	0.00055582	1.21406	0.00834448
0.159215		0	0	0.0625992	0	0.12545	0	0.188554	0	0.251914	0	0.50793	0	1.24147	0.0147587
0.318414		0	0	0.0625992	0	0.12545	0	0.188554	0	0.251914	0	0.50793	0	1.26322	0.0104383
0.636764		0	0	0.0625992	0	0.12545	0	0.188554	0	0.251914	0	0.50793	0	1.27596	0.00585459
0.95505		0	0	0.0625992	0	0.12545	0	0.188554	0	0.251914	0	0.50793	0	1.27594	0.00475908
1.27327		0	0	0.0625992	0	0.12545	0	0.188554	0	0.251914	0	0.50793	0	1.27949	0.00612321
1.59143		0	0	0.0625992	0	0.12545	0	0.188554	0	0.251914	0	0.50793	0	1.28023	0.00923515
3.18127		0	0	0.0625992	0	0.12545	0	0.188554	0	0.251914	0	0.50793	0	1.28251	0.00302355
3.81676		0	0	0.0625992	0	0.12545	0	0.188554	0	0.251914	0	0.50793	0	1.28585	0.00502266
5.0005		0	0	0.0625992	0	0.12545	0	0.188554	0	0.251914	0	0.50793	0	1.28454	0.00542632
10.001		0	0	0.0625992	0	0.12545	0	0.188554	0	0.251914	0	0.50793	0	1.29012	0.00800473
15.0015		0	0	0.0625992	0	0.12545	0	0.188554	0	0.251914	0	0.50793	0	1.28878	0.00602345
20.002		0	0	0.0625992	0	0.12545	0	0.188554	0	0.251914	0	0.50793	0	1.29023	0.00539501
25.0025		0	0	0.0625992	0	0.12545	0	0.188554	0	0.251914	0	0.50793	0	1.28983	0.00527846
30.003		0	0	0.0625992	0	0.12545	0	0.188554	0	0.251914	0	0.50793	0	1.29142	0.00539341
35.0035		0	0	0.0625992	0	0.12545	0	0.188554	0	0.251914	0	0.50793	0	1.29386	0.00823474
40.004		0	0	0.0625992	0	0.12545	0	0.188554	0	0.251914	0	0.50793	0	1.2887	0.007955
45.0044		0	0	0.0625992	0	0.12545	0	0.188554	0	0.251914	0	0.50793	0	1.28973	0.00808636
50.0049		0	0	0.0625992	0	0.12545	0	0.188554	0	0.251914	0	0.50793	0	1.29258	0.00998759
55.0054		0	0	0.0625992	0	0.12545	0	0.188554	0	0.251914	0	0.50793	0	1.29629	0.00905087
60.0059		0	0	0.0625992	0	0.12545	0	0.188554	0	0.251914	0	0.50793	0	1.29146	0.00237402
65.0064		0	0	0.0625992	0	0.12545	0	0.188554	0	0.251914	0	0.50793	0	1.29165	0.00336974
70.0068		0	0	0.0625992	0	0.12545	0	0.188554	0	0.251914	0	0.50793	0	1.29307	0.0100205
75.0073		0	0	0.0625992	0	0.12545	0	0.188554	0	0.251914	0	0.50793	0	1.29379	0.0104611
80.0078		0	0	0.0625992	0	0.12545	0	0.188554	0	0.251914	0	0.50793	0	1.29637	0.0058137
85.0083		0	0	0.0625992	0	0.12545	0	0.188554	0	0.251914	0	0.50793	0	1.29318	0.00928286
90.0087		0	0	0.0625992	0	0.12545	0	0.188554	0	0.251914	0	0.50793	0	1.29417	0.0042888
95.0092		0	0	0.0625992	0	0.12545	0	0.188554	0	0.251914	0	0.50793	0	1.29589	0.00285189
%RH	N2
0		0	0	0	0	0	0	0	0	0	0	0	0	0	0
0.00318445		0	0	0	0	0	0	0	0	0	0	0	0	0	0
0.0318442		0	0	0	0	0	0	0	0	0	0	0	0	0	0
0.159215		0	0	0	0	0	0	0	0	0	0	0	0	0	0
0.318414		0	0	0	0	0	0	0	0	0	0	0	0	0	0
0.636764		0	0	0	0	0	0	0	0	0	0	0	0	0	0
0.95505		0	0	0	0	0	0	0	0	0	0	0	0	0	0
1.27327		0	0	0	0	0	0	0	0	0	0	0	0	0	0
1.59143		0	0	0	0	0	0	0	0	0	0	0	0	0	0
3.18127		0	0	0	0	0	0	0	0	0	0	0	0	0	0
3.81676		0	0	0	0	0	0	0	0	0	0	0	0	0	0
5.0005		0	0	0	0	0	0	0	0	0	0	0	0	0	0
10.001		0	0	0	0	0	0	0	0	0	0	0	0	0	0
15.0015		0	0	0	0	0	0	0	0	0	0	0	0	0	0
20.002		0	0	0	0	0	0	0	0	0	0	0	0	0	0
25.0025		0	0	0	0	0	0	0	0	0	0	0	0	0	0
30.003		0	0	0	0	0	0	0	0	0	0	0	0	0	0
35.0035		0	0	0	0	0	0	0	0	0	0	0	0	0	0
40.004		0	0	0	0	0	0	0	0	0	0	0	0	0	0
45.0044		0	0	0	0	0	0	0	0	0	0	0	0	0	0
50.0049		0	0	0	0	0	0	0	0	0	0	0	0	0	0
55.0054		0	0	0	0	0	0	0	0	0	0	0	0	0	0
60.0059		0	0	0	0	0	0	0	0	0	0	0	0	0	0
65.0064		0	0	0	0	0	0	0	0	0	0	0	0	0	0
70.0068		0	0	0	0	0	0	0	0	0	0	0	0	0	0
75.0073		0	0	0	0	0	0	0	0	0	0	0	0	0	0
80.0078		0	0	0	0	0	0	0	0	0	0	0	0	0	0
85.0083		0	0	0	0	0	0	0	0	0	0	0	0	0	0
90.0087		0	0	0	0	0	0	0	0	0	0	0	0	0	0
95.0092		0	0	0	0	0	0	0	0	0	0	0	0	0	0
%RH	O2
0		0	0	0	0	0	0	0	0	0	0	0	0	1.627e-07	3.044e-07
0.00318445		0	0	0	0	0	0	0	0	0	0	0	0	0	0
0.0318442		0	0	0	0	0	0	0	0	0	0	0	0	0	0
0.159215		0	0	0	0	0	0	0	0	0	0	0	0	0	0
0.318414		0	0	0	0	0	0	0	0	0	0	0	0	0	0
0.636764		0	0	0	0	0	0	0	0	0	0	0	0	0	0
0.95505		0	0	0	0	0	0	0	0	0	0	0	0	0	0
1.27327		0	0	0	0	0	0	0	0	0	0	0	0	0	0
1.59143		0	0	0	0	0	0	0	0	0	0	0	0	0	0
3.18127		0	0	0	0	0	0	0	0	0	0	0	0	0	0
3.81676		0	0	0	0	0	0	0	0	0	0	0	0	0	0
5.0005		0	0	0	0	0	0	0	0	0	0	0	0	0	0
10.001		0	0	0	0	0	0	0	0	0	0	0	0	0	0
15.0015		0	0	0	0	0	0	0	0	0	0	0	0	0	0
20.002		0	0	0	0	0	0	0	0	0	0	0	0	0	0
25.0025		0	0	0	0	0	0	0	0	0	0	0	0	0	0
30.003		0	0	0	0	0	0	0	0	0	0	0	0	0	0
35.0035		0	0	0	0	0	0	0	0	0	0	0	0	0	0
40.004		0	0	0	0	0	0	0	0	0	0	0	0	0	0
45.0044		0	0	0	0	0	0	0	0	0	0	0	0	0	0
50.0049		0	0	0	0	0	0	0	0	0	0	0	0	0	0
55.0054		0	0	0	0	0	0	0	0	0	0	0	0	0	0
60.0059		0	0	0	0	0	0	0	0	0	0	0	0	0	0
65.0064		0	0	0	0	0	0	0	0	0	0	0	0	0	0
70.0068		0	0	0	0	0	0	0	0	0	0	0	0	0	0
75.0073		0	0	0	0	0	0	0	0	0	0	0	0	0	0
80.0078		0	0	0	0	0	0	0	0	0	0	0	0	0	0
85.0083		0	0	0	0	0	0	0	0	0	0	0	0	0	0
90.0087		0	0	0	0	0	0	0	0	0	0	0	0	0	0
95.0092		0	0	0	0	0	0	0	0	0	0	0	0	0	0
%RH	argon
0		0	0	0	0	0	0	0	0	0	0	0	0	0	0
0.00318445		0	0	0	0	0	0	0	0	0	0	0	0	0	0
0.0318442		0	0	0	0	0	0	0	0	0	0	0	0	0	0
0.159215		0	0	0	0	0	0	0	0	0	0	0	0	0	0
0.318414		0	0	0	0	0	0	0	0	0	0	0	0	0	0
0.636764		0	0	0	0	0	0	0	0	0	0	0	0	0	0
0.95505		0	0	0	0	0	0	0	0	0	0	0	0	0	0
1.27327		0	0	0	0	0	0	0	0	0	0	0	0	0	0
1.59143		0	0	0	0	0	0	0	0	0	0	0	0	0	0
3.18127		0	0	0	0	0	0	0	0	0	0	0	0	0	0
3.81676		0	0	0	0	0	0	0	0	0	0	0	0	0	0
5.0005		0	0	0	0	0	0	0	0	0	0	0	0	0	0
10.001		0	0	0	0	0	0	0	0	0	0	0	0	0	0
15.0015		0	0	0	0	0	0	0	0	0	0	0	0	0	0
20.002		0	0	0	0	0	0	0	0	0	0	0	0	0	0
25.0025		0	0	0	0	0	0	0	0	0	0	0	0	0	0
30.003		0	0	0	0	0	0	0	0	0	0	0	0	0	0
35.0035		0	0	0	0	0	0	0	0	0	0	0	0	0	0
40.004		0	0	0	0	0	0	0	0	0	0	0	0	0	0
45.0044		0	0	0	0	0	0	0	0	0	0	0	0	0	0
50.0049		0	0	0	0	0	0	0	0	0	0	0	0	0	0
55.0054		0	0	0	0	0	0	0	0	0	0	0	0	0	0
60.0059		0	0	0	0	0	0	0	0	0	0	0	0	0	0
65.0064		0	0	0	0	0	0	0	0	0	0	0	0	0	0
70.0068		0	0	0	0	0	0	0	0	0	0	0	0	0	0
75.0073		0	0	0	0	0	0	0	0	0	0	0	0	0	0
80.0078		0	0	0	0	0	0	0	0	0	0	0	0	0	0
85.0083		0	0	0	0	0	0	0	0	0	0	0	0	0	0
90.0087		0	0	0	0	0	0	0	0	0	0	0	0	0	0
95.0092		0	0	0	0	0	0	0	0	0	0	0	0	0	0
	313k
	MOL/KG
%RH	tip3p
0		0	0	0	0	0	0	0	0	0	0	0	0	0	0
0.00136563		0	0	0.0625992	0	0.124891	0.00223819	0.188554	0	0.251914	0	0.504419	0.00464025	1.07926	0.0161426
0.0136562		0	0	0.0625992	0	0.12545	0	0.185653	0.0104877	0.251914	0	0.507162	0.0030725	1.17129	0.0105832
0.0682781		0	0	0.0625992	0	0.12545	0	0.188554	0	0.251914	0	0.50793	0	1.21653	0.012773
0.136549		0	0	0.0625992	0	0.12545	0	0.188554	0	0.251914	0	0.50793	0	1.23777	0.0183729
0.273071		0	0	0.0625992	0	0.12545	0	0.188554	0	0.251914	0	0.50793	0	1.25598	0.00804832
0.409566		0	0	0.0625992	0	0.12545	0	0.188554	0	0.251914	0	0.50793	0	1.25285	0.0103993
0.546033		0	0	0.0625226	0.00030611	0.125428	9.00105e-05	0.188554	0	0.251914	0	0.50793	0	1.26295	0.00975111
0.682473		0	0	0.0625992	0	0.12545	0	0.188554	0	0.251914	0	0.50793	0	1.26465	0.0146431
1.36426		0	0	0.0625992	0	0.12545	0	0.188554	0	0.251914	0	0.50793	0	1.2777	0.0067261
1.63679		0	0	0.0625992	0	0.12545	0	0.188554	0	0.251914	0	0.50793	0	1.28021	0.00642921
5.0005		0	0	0.0625992	0	0.12545	0	0.188554	0	0.251914	0	0.50793	0	1.28527	0.00221762
10.001		0	0	0.0625992	0	0.12545	0	0.188554	0	0.251914	0	0.50793	0	1.28388	0.00534451
15.0015		0	0	0.0625992	0	0.12545	0	0.188554	0	0.251914	0	0.50793	0	1.28811	0.00422646
20.002		0	0	0.0625992	0	0.12545	0	0.188554	0	0.251914	0	0.50793	0	1.28578	0.00783869
25.0025		0	0	0.0625992	0	0.12545	0	0.188554	0	0.251914	0	0.50793	0	1.28842	0.00379964
30.0029		0	0	0.0625992	0	0.12545	0	0.188554	0	0.251914	0	0.50793	0	1.29135	0.00676397
35.0034		0	0	0.0625992	0	0.12545	0	0.188554	0	0.251914	0	0.50793	0	1.29268	0.00481791
40.0039		0	0	0.0625992	0	0.12545	0	0.188554	0	0.251914	0	0.50793	0	1.28973	0.00321472
45.0044		0	0	0.0625992	0	0.12545	0	0.188554	0	0.251914	0	0.50793	0	1.29021	0.00675654
50.0048		0	0	0.0625992	0	0.12545	0	0.188554	0	0.251914	0	0.50793	0	1.29128	0.0049567
55.0053		0	0	0.0625992	0	0.12545	0	0.188554	0	0.251914	0	0.50793	0	1.29138	0.00907791
60.0057		0	0	0.0625992	0	0.12545	0	0.188554	0	0.251914	0	0.50793	0	1.29231	0.00809896
65.0062		0	0	0.0625992	0	0.12545	0	0.188554	0	0.251914	0	0.50793	0	1.2929	0.00635483
70.0066		0	0	0.0625992	0	0.12545	0	0.188554	0	0.251914	0	0.50793	0	1.29433	0.00502748
75.0071		0	0	0.0625992	0	0.12545	0	0.188554	0	0.251914	0	0.50793	0	1.29478	0.00802885
80.0075		0	0	0.0625992	0	0.12545	0	0.188554	0	0.251914	0	0.50793	0	1.29643	0.00635718
85.008		0	0	0.0625992	0	0.12545	0	0.188554	0	0.251914	0	0.50793	0	1.29002	0.00600074
90.0084		0	0	0.0625992	0	0.12545	0	0.188554	0	0.251914	0	0.50793	0	1.29306	0.00776387
95.0088		0	0	0.0625992	0	0.12545	0	0.188554	0	0.251914	0	0.50793	0	1.29666	0.00475928
%RH	N2
0		0	0	0	0	0	0	0	0	0	0	0	0	0	0
0.00136563		0	0	0	0	0	0	0	0	0	0	0	0	0	0
0.0136562		0	0	0	0	0	0	0	0	0	0	0	0	0	0
0.0682781		0	0	0	0	0	0	0	0	0	0	0	0	0	0
0.136549		0	0	0	0	0	0	0	0	0	0	0	0	0	0
0.273071		0	0	0	0	0	0	0	0	0	0	0	0	0	0
0.409566		0	0	0	0	0	0	0	0	0	0	0	0	0	0
0.546033		0	0	0	0	0	0	0	0	0	0	0	0	0	0
0.682473		0	0	0	0	0	0	0	0	0	0	0	0	0	0
1.36426		0	0	0	0	0	0	0	0	0	0	0	0	0	0
1.63679		0	0	0	0	0	0	0	0	0	0	0	0	0	0
5.0005		0	0	0	0	0	0	0	0	0	0	0	0	0	0
10.001		0	0	0	0	0	0	0	0	0	0	0	0	0	0
15.0015		0	0	0	0	0	0	0	0	0	0	0	0	0	0
20.002		0	0	0	0	0	0	0	0	0	0	0	0	0	0
25.0025		0	0	0	0	0	0	0	0	0	0	0	0	0	0
30.0029		0	0	0	0	0	0	0	0	0	0	0	0	0	0
35.0034		0	0	0	0	0	0	0	0	0	0	0	0	0	0
40.0039		0	0	0	0	0	0	0	0	0	0	0	0	0	0
45.0044		0	0	0	0	0	0	0	0	0	0	0	0	0	0
50.0048		0	0	0	0	0	0	0	0	0	0	0	0	0	0
55.0053		0	0	0	0	0	0	0	0	0	0	0	0	0	0
60.0057		0	0	0	0	0	0	0	0	0	0	0	0	0	0
65.0062		0	0	0	0	0	0	0	0	0	0	0	0	0	0
70.0066		0	0	0	0	0	0	0	0	0	0	0	0	0	0
75.0071		0	0	0	0	0	0	0	0	0	0	0	0	0	0
80.0075		0	0	0	0	0	0	0	0	0	0	0	0	0	0
85.008		0	0	0	0	0	0	0	0	0	0	0	0	0	0
90.0084		0	0	0	0	0	0	0	0	0	0	0	0	0	0
95.0088		0	0	0	0	0	0	0	0	0	0	0	0	0	0
%RH	O2
0		0	0	0	0	0	0	0	0	0	0	0	0	1.22e-07	1.993e-07
0.00136563		0	0	0	0	0	0	0	0	0	0	0	0	0	0
0.0136562		0	0	0	0	0	0	0	0	0	0	0	0	0	0
0.0682781		0	0	0	0	0	0	0	0	0	0	0	0	0	0
0.136549		0	0	0	0	0	0	0	0	0	0	0	0	0	0
0.273071		0	0	0	0	0	0	0	0	0	0	0	0	0	0
0.409566		0	0	0	0	0	0	0	0	0	0	0	0	0	0
0.546033		0	0	0	0	0	0	0	0	0	0	0	0	0	0
0.682473		0	0	0	0	0	0	0	0	0	0	0	0	0	0
1.36426		0	0	0	0	0	0	0	0	0	0	0	0	0	0
1.63679		0	0	0	0	0	0	0	0	0	0	0	0	0	0
5.0005		0	0	0	0	0	0	0	0	0	0	0	0	0	0
10.001		0	0	0	0	0	0	0	0	0	0	0	0	0	0
15.0015		0	0	0	0	0	0	0	0	0	0	0	0	0	0
20.002		0	0	0	0	0	0	0	0	0	0	0	0	0	0
25.0025		0	0	0	0	0	0	0	0	0	0	0	0	0	0
30.0029		0	0	0	0	0	0	0	0	0	0	0	0	0	0
35.0034		0	0	0	0	0	0	0	0	0	0	0	0	0	0
40.0039		0	0	0	0	0	0	0	0	0	0	0	0	0	0
45.0044		0	0	0	0	0	0	0	0	0	0	0	0	0	0
50.0048		0	0	0	0	0	0	0	0	0	0	0	0	0	0
55.0053		0	0	0	0	0	0	0	0	0	0	0	0	0	0
60.0057		0	0	0	0	0	0	0	0	0	0	0	0	0	0
65.0062		0	0	0	0	0	0	0	0	0	0	0	0	0	0
70.0066		0	0	0	0	0	0	0	0	0	0	0	0	0	0
75.0071		0	0	0	0	0	0	0	0	0	0	0	0	0	0
80.0075		0	0	0	0	0	0	0	0	0	0	0	0	0	0
85.008		0	0	0	0	0	0	0	0	0	0	0	0	0	0
90.0084		0	0	0	0	0	0	0	0	0	0	0	0	0	0
95.0088		0	0	0	0	0	0	0	0	0	0	0	0	0	0
%RH	argon
0		0	0	0	0	0	0	0	0	0	0	0	0	0	0
0.00136563		0	0	0	0	0	0	0	0	0	0	0	0	0	0
0.0136562		0	0	0	0	0	0	0	0	0	0	0	0	0	0
0.0682781		0	0	0	0	0	0	0	0	0	0	0	0	0	0
0.136549		0	0	0	0	0	0	0	0	0	0	0	0	0	0
0.273071		0	0	0	0	0	0	0	0	0	0	0	0	0	0
0.409566		0	0	0	0	0	0	0	0	0	0	0	0	0	0
0.546033		0	0	0	0	0	0	0	0	0	0	0	0	0	0
0.682473		0	0	0	0	0	0	0	0	0	0	0	0	0	0
1.36426		0	0	0	0	0	0	0	0	0	0	0	0	0	0
1.63679		0	0	0	0	0	0	0	0	0	0	0	0	0	0
5.0005		0	0	0	0	0	0	0	0	0	0	0	0	0	0
10.001		0	0	0	0	0	0	0	0	0	0	0	0	0	0
15.0015		0	0	0	0	0	0	0	0	0	0	0	0	0	0
20.002		0	0	0	0	0	0	0	0	0	0	0	0	0	0
25.0025		0	0	0	0	0	0	0	0	0	0	0	0	0	0
30.0029		0	0	0	0	0	0	0	0	0	0	0	0	0	0
35.0034		0	0	0	0	0	0	0	0	0	0	0	0	0	0
40.0039		0	0	0	0	0	0	0	0	0	0	0	0	0	0
45.0044		0	0	0	0	0	0	0	0	0	0	0	0	0	0
50.0048		0	0	0	0	0	0	0	0	0	0	0	0	0	0
55.0053		0	0	0	0	0	0	0	0	0	0	0	0	0	0
60.0057		0	0	0	0	0	0	0	0	0	0	0	0	0	0
65.0062		0	0	0	0	0	0	0	0	0	0	0	0	0	0
70.0066		0	0	0	0	0	0	0	0	0	0	0	0	0	0
75.0071		0	0	0	0	0	0	0	0	0	0	0	0	0	0
80.0075		0	0	0	0	0	0	0	0	0	0	0	0	0	0
85.008		0	0	0	0	0	0	0	0	0	0	0	0	0	0
90.0084		0	0	0	0	0	0	0	0	0	0	0	0	0	0
95.0088		0	0	0	0	0	0	0	0	0	0	0	0	0	0
	278k
	MOLECULES/UNITCELL
%RH	tip3p
0		0	0	0	0	0	0	0	0	0	0	0	0	0	0
0.0116767		0	0	4	0	8	0	11.6917	0.708805	15.9207	0.31722	31.999	0.00403	74.2587	0.483237
0.116766		0	0	4	0	8	0	12	0	16	0	32	0	77.3314	0.908745
0.583806		0	0	4	0	8	0	12	0	16	0	32	0	78.4528	0.661877
1.16755		0	0	4	0	8	0	12	0	16	0	32	0	78.5911	0.418571
2.33487		0	0	4	0	8	0	12	0	16	0	32	0	79.0535	0.167376
3.50196		0	0	4	0	8	0	12	0	16	0	32	0	78.9266	0.17439
4.66881		0	0	4	0	8	0	12	0	16	0	32	0	79.129	0.274918
5.00283		0	0	4	0	8	0	12	0	16	0	32	0	79.0668	0.289858
5.83543		0	0	4	0	8	0	12	0	16	0	32	0	79.0877	0.0485842
10.0057		0	0	4	0	8	0	12	0	16	0	32	0	79.1963	0.15898
11.665		0	0	4	0	8	0	12	0	16	0	32	0	79.3335	0.222645
13.9952		0	0	4	0	8	0	12	0	16	0	32	0	79.3537	0.482768
15.0085		0	0	4	0	8	0	12	0	16	0	32	0	79.244	0.190011
20.0113		0	0	4	0	8	0	12	0	16	0	32	0	79.3766	0.180394
25.0142		0	0	4	0	8	0	12	0	16	0	32	0	79.248	0.258881
30.017		0	0	4	0	8	0	12	0	16	0	32	0	79.3934	0.131462
35.0198		0	0	4	0	8	0	12	0	16	0	32	0	79.5444	0.517273
40.0227		0	0	3.9642	0.14319	8	0	12	0	16	0	32	0	79.4848	0.226363
45.0255		0	0	4	0	8	0	12	0	16	0	32	0	79.6406	0.347562
50.0283		0	0	4	0	8	0	12	0	16	0	32	0	79.6343	0.385186
55.0312		0	0	4	0	8	0	12	0	16	0	32	0	79.6299	0.332745
60.034		0	0	4	0	8	0	12	0	16	0	32	0	79.5439	0.713566
65.0368		0	0	4	0	8	0	12	0	16	0	32	0	79.5685	0.361502
70.0396		0	0	4	0	8	0	12	0	16	0	32	0	79.8692	0.352841
75.0425		0	0	4	0	8	0	12	0	16	0	32	0	79.7598	0.270625
80.0453		0	0	4	0	8	0	12	0	16	0	32	0	79.6517	0.52426
85.0481		0	0	4	0	8	0	12	0	16	0	32	0	79.6131	0.646198
90.051		0	0	4	0	8	0	12	0	16	0	32	0	79.6874	0.382439
95.0538		0	0	4	0	8	0	12	0	16	0	32	0	79.9873	0.0222435
%RH	N2
0		0	0	0	0	0	0	0	0	0	0	0	0	0	0
0.0116767		0	0	0	0	0	0	0	0	0	0	0	0	0	0
0.116766		0	0	0	0	0	0	0	0	0	0	0	0	0	0
0.583806		0	0	0	0	0	0	0	0	0	0	0	0	0	0
1.16755		0	0	0	0	0	0	0	0	0	0	0	0	0	0
2.33487		0	0	0	0	0	0	0	0	0	0	0	0	0	0
3.50196		0	0	0	0	0	0	0	0	0	0	0	0	0	0
4.66881		0	0	0	0	0	0	0	0	0	0	0	0	0	0
5.00283		0	0	0	0	0	0	0	0	0	0	0	0	0	0
5.83543		0	0	0	0	0	0	0	0	0	0	0	0	0	0
10.0057		0	0	0	0	0	0	0	0	0	0	0	0	0	0
11.665		0	0	0	0	0	0	0	0	0	0	0	0	0	0
13.9952		0	0	0	0	0	0	0	0	0	0	0	0	0	0
15.0085		0	0	0	0	0	0	0	0	0	0	0	0	0	0
20.0113		0	0	0	0	0	0	0	0	0	0	0	0	0	0
25.0142		0	0	0	0	0	0	0	0	0	0	0	0	0	0
30.017		0	0	0	0	0	0	0	0	0	0	0	0	0	0
35.0198		0	0	0	0	0	0	0	0	0	0	0	0	0	0
40.0227		0	0	0	0	0	0	0	0	0	0	0	0	0	0
45.0255		0	0	0	0	0	0	0	0	0	0	0	0	0	0
50.0283		0	0	0	0	0	0	0	0	0	0	0	0	0	0
55.0312		0	0	0	0	0	0	0	0	0	0	0	0	0	0
60.034		0	0	0	0	0	0	0	0	0	0	0	0	0	0
65.0368		0	0	0	0	0	0	0	0	0	0	0	0	0	0
70.0396		0	0	0	0	0	0	0	0	0	0	0	0	0	0
75.0425		0	0	0	0	0	0	0	0	0	0	0	0	0	0
80.0453		0	0	0	0	0	0	0	0	0	0	0	0	0	0
85.0481		0	0	0	0	0	0	0	0	0	0	0	0	0	0
90.051		0	0	0	0	0	0	0	0	0	0	0	0	0	0
95.0538		0	0	0	0	0	0	0	0	0	0	0	0	0	0
%RH	O2
0		0	0	0	0	0	0	0	0	0	0	0	0	5e-06	2e-05
0.0116767		0	0	0	0	0	0	0	0	0	0	0	0	0	0
0.116766		0	0	0	0	0	0	0	0	0	0	0	0	0	0
0.583806		0	0	0	0	0	0	0	0	0	0	0	0	0	0
1.16755		0	0	0	0	0	0	0	0	0	0	0	0	0	0
2.33487		0	0	0	0	0	0	0	0	0	0	0	0	0	0
3.50196		0	0	0	0	0	0	0	0	0	0	0	0	0	0
4.66881		0	0	0	0	0	0	0	0	0	0	0	0	0	0
5.00283		0	0	0	0	0	0	0	0	0	0	0	0	0	0
5.83543		0	0	0	0	0	0	0	0	0	0	0	0	0	0
10.0057		0	0	0	0	0	0	0	0	0	0	0	0	0	0
11.665		0	0	0	0	0	0	0	0	0	0	0	0	0	0
13.9952		0	0	0	0	0	0	0	0	0	0	0	0	0	0
15.0085		0	0	0	0	0	0	0	0	0	0	0	0	0	0
20.0113		0	0	0	0	0	0	0	0	0	0	0	0	0	0
25.0142		0	0	0	0	0	0	0	0	0	0	0	0	0	0
30.017		0	0	0	0	0	0	0	0	0	0	0	0	0	0
35.0198		0	0	0	0	0	0	0	0	0	0	0	0	0	0
40.0227		0	0	0	0	0	0	0	0	0	0	0	0	0	0
45.0255		0	0	0	0	0	0	0	0	0	0	0	0	0	0
50.0283		0	0	0	0	0	0	0	0	0	0	0	0	0	0
55.0312		0	0	0	0	0	0	0	0	0	0	0	0	0	0
60.034		0	0	0	0	0	0	0	0	0	0	0	0	0	0
65.0368		0	0	0	0	0	0	0	0	0	0	0	0	0	0
70.0396		0	0	0	0	0	0	0	0	0	0	0	0	0	0
75.0425		0	0	0	0	0	0	0	0	0	0	0	0	0	0
80.0453		0	0	0	0	0	0	0	0	0	0	0	0	0	0
85.0481		0	0	0	0	0	0	0	0	0	0	0	0	0	0
90.051		0	0	0	0	0	0	0	0	0	0	0	0	0	0
95.0538		0	0	0	0	0	0	0	0	0	0	0	0	0	0
%RH	argon
0		0	0	0	0	0	0	0	0	0	0	0	0	0	0
0.0116767		0	0	0	0	0	0	0	0	0	0	0	0	0	0
0.116766		0	0	0	0	0	0	0	0	0	0	0	0	0	0
0.583806		0	0	0	0	0	0	0	0	0	0	0	0	0	0
1.16755		0	0	0	0	0	0	0	0	0	0	0	0	0	0
2.33487		0	0	0	0	0	0	0	0	0	0	0	0	0	0
3.50196		0	0	0	0	0	0	0	0	0	0	0	0	0	0
4.66881		0	0	0	0	0	0	0	0	0	0	0	0	0	0
5.00283		0	0	0	0	0	0	0	0	0	0	0	0	0	0
5.83543		0	0	0	0	0	0	0	0	0	0	0	0	0	0
10.0057		0	0	0	0	0	0	0	0	0	0	0	0	0	0
11.665		0	0	0	0	0	0	0	0	0	0	0	0	0	0
13.9952		0	0	0	0	0	0	0	0	0	0	0	0	0	0
15.0085		0	0	0	0	0	0	0	0	0	0	0	0	0	0
20.0113		0	0	0	0	0	0	0	0	0	0	0	0	0	0
25.0142		0	0	0	0	0	0	0	0	0	0	0	0	0	0
30.017		0	0	0	0	0	0	0	0	0	0	0	0	0	0
35.0198		0	0	0	0	0	0	0	0	0	0	0	0	0	0
40.0227		0	0	0	0	0	0	0	0	0	0	0	0	0	0
45.0255		0	0	0	0	0	0	0	0	0	0	0	0	0	0
50.0283		0	0	0	0	0	0	0	0	0	0	0	0	0	0
55.0312		0	0	0	0	0	0	0	0	0	0	0	0	0	0
60.034		0	0	0	0	0	0	0	0	0	0	0	0	0	0
65.0368		0	0	0	0	0	0	0	0	0	0	0	0	0	0
70.0396		0	0	0	0	0	0	0	0	0	0	0	0	0	0
75.0425		0	0	0	0	0	0	0	0	0	0	0	0	0	0
80.0453		0	0	0	0	0	0	0	0	0	0	0	0	0	0
85.0481		0	0	0	0	0	0	0	0	0	0	0	0	0	0
90.051		0	0	0	0	0	0	0	0	0	0	0	0	0	0
95.0538		0	0	0	0	0	0	0	0	0	0	0	0	0	0
	298k
	MOLECULES/UNITCELL
%RH	tip3p
0		0	0	0	0	0	0	0	0	0	0	0	0	0	0
0.00318445		0	0	4	0	8	0	12	0	16	0	31.9509	0.183067	70.1281	1.4236
0.0318442		0	0	4	0	8	0	12	0	16	0	31.989	0.0350171	74.6182	0.512866
0.159215		0	0	4	0	8	0	12	0	16	0	32	0	76.303	0.907095
0.318414		0	0	4	0	8	0	12	0	16	0	32	0	77.6395	0.641556
0.636764		0	0	4	0	8	0	12	0	16	0	32	0	78.4227	0.359833
0.95505		0	0	4	0	8	0	12	0	16	0	32	0	78.4213	0.292501
1.27327		0	0	4	0	8	0	12	0	16	0	32	0	78.6395	0.376343
1.59143		0	0	4	0	8	0	12	0	16	0	32	0	78.6852	0.567608
3.18127		0	0	4	0	8	0	12	0	16	0	32	0	78.825	0.185833
3.81676		0	0	4	0	8	0	12	0	16	0	32	0	79.0304	0.308701
5.0005		0	0	4	0	8	0	12	0	16	0	32	0	78.9498	0.333511
10.001		0	0	4	0	8	0	12	0	16	0	32	0	79.2927	0.491984
15.0015		0	0	4	0	8	0	12	0	16	0	32	0	79.2104	0.370211
20.002		0	0	4	0	8	0	12	0	16	0	32	0	79.2996	0.331586
25.0025		0	0	4	0	8	0	12	0	16	0	32	0	79.275	0.324423
30.003		0	0	4	0	8	0	12	0	16	0	32	0	79.3729	0.331488
35.0035		0	0	4	0	8	0	12	0	16	0	32	0	79.5226	0.506121
40.004		0	0	4	0	8	0	12	0	16	0	32	0	79.2058	0.488928
45.0044		0	0	4	0	8	0	12	0	16	0	32	0	79.2692	0.497001
50.0049		0	0	4	0	8	0	12	0	16	0	32	0	79.444	0.613854
55.0054		0	0	4	0	8	0	12	0	16	0	32	0	79.6721	0.556282
60.0059		0	0	4	0	8	0	12	0	16	0	32	0	79.3752	0.145911
65.0064		0	0	4	0	8	0	12	0	16	0	32	0	79.3867	0.20711
70.0068		0	0	4	0	8	0	12	0	16	0	32	0	79.4744	0.615874
75.0073		0	0	4	0	8	0	12	0	16	0	32	0	79.5186	0.642955
80.0078		0	0	4	0	8	0	12	0	16	0	32	0	79.6771	0.35732
85.0083		0	0	4	0	8	0	12	0	16	0	32	0	79.481	0.57054
90.0087		0	0	4	0	8	0	12	0	16	0	32	0	79.5417	0.263597
95.0092		0	0	4	0	8	0	12	0	16	0	32	0	79.6478	0.175282
%RH	N2
0		0	0	0	0	0	0	0	0	0	0	0	0	0	0
0.00318445		0	0	0	0	0	0	0	0	0	0	0	0	0	0
0.0318442		0	0	0	0	0	0	0	0	0	0	0	0	0	0
0.159215		0	0	0	0	0	0	0	0	0	0	0	0	0	0
0.318414		0	0	0	0	0	0	0	0	0	0	0	0	0	0
0.636764		0	0	0	0	0	0	0	0	0	0	0	0	0	0
0.95505		0	0	0	0	0	0	0	0	0	0	0	0	0	0
1.27327		0	0	0	0	0	0	0	0	0	0	0	0	0	0
1.59143		0	0	0	0	0	0	0	0	0	0	0	0	0	0
3.18127		0	0	0	0	0	0	0	0	0	0	0	0	0	0
3.81676		0	0	0	0	0	0	0	0	0	0	0	0	0	0
5.0005		0	0	0	0	0	0	0	0	0	0	0	0	0	0
10.001		0	0	0	0	0	0	0	0	0	0	0	0	0	0
15.0015		0	0	0	0	0	0	0	0	0	0	0	0	0	0
20.002		0	0	0	0	0	0	0	0	0	0	0	0	0	0
25.0025		0	0	0	0	0	0	0	0	0	0	0	0	0	0
30.003		0	0	0	0	0	0	0	0	0	0	0	0	0	0
35.0035		0	0	0	0	0	0	0	0	0	0	0	0	0	0
40.004		0	0	0	0	0	0	0	0	0	0	0	0	0	0
45.0044		0	0	0	0	0	0	0	0	0	0	0	0	0	0
50.0049		0	0	0	0	0	0	0	0	0	0	0	0	0	0
55.0054		0	0	0	0	0	0	0	0	0	0	0	0	0	0
60.0059		0	0	0	0	0	0	0	0	0	0	0	0	0	0
65.0064		0	0	0	0	0	0	0	0	0	0	0	0	0	0
70.0068		0	0	0	0	0	0	0	0	0	0	0	0	0	0
75.0073		0	0	0	0	0	0	0	0	0	0	0	0	0	0
80.0078		0	0	0	0	0	0	0	0	0	0	0	0	0	0
85.0083		0	0	0	0	0	0	0	0	0	0	0	0	0	0
90.0087		0	0	0	0	0	0	0	0	0	0	0	0	0	0
95.0092		0	0	0	0	0	0	0	0	0	0	0	0	0	0
%RH	O2
0		0	0	0	0	0	0	0	0	0	0	0	0	1e-05	1.87083e-05
0.00318445		0	0	0	0	0	0	0	0	0	0	0	0	0	0
0.0318442		0	0	0	0	0	0	0	0	0	0	0	0	0	0
0.159215		0	0	0	0	0	0	0	0	0	0	0	0	0	0
0.318414		0	0	0	0	0	0	0	0	0	0	0	0	0	0
0.636764		0	0	0	0	0	0	0	0	0	0	0	0	0	0
0.95505		0	0	0	0	0	0	0	0	0	0	0	0	0	0
1.27327		0	0	0	0	0	0	0	0	0	0	0	0	0	0
1.59143		0	0	0	0	0	0	0	0	0	0	0	0	0	0
3.18127		0	0	0	0	0	0	0	0	0	0	0	0	0	0
3.81676		0	0	0	0	0	0	0	0	0	0	0	0	0	0
5.0005		0	0	0	0	0	0	0	0	0	0	0	0	0	0
10.001		0	0	0	0	0	0	0	0	0	0	0	0	0	0
15.0015		0	0	0	0	0	0	0	0	0	0	0	0	0	0
20.002		0	0	0	0	0	0	0	0	0	0	0	0	0	0
25.0025		0	0	0	0	0	0	0	0	0	0	0	0	0	0
30.003		0	0	0	0	0	0	0	0	0	0	0	0	0	0
35.0035		0	0	0	0	0	0	0	0	0	0	0	0	0	0
40.004		0	0	0	0	0	0	0	0	0	0	0	0	0	0
45.0044		0	0	0	0	0	0	0	0	0	0	0	0	0	0
50.0049		0	0	0	0	0	0	0	0	0	0	0	0	0	0
55.0054		0	0	0	0	0	0	0	0	0	0	0	0	0	0
60.0059		0	0	0	0	0	0	0	0	0	0	0	0	0	0
65.0064		0	0	0	0	0	0	0	0	0	0	0	0	0	0
70.0068		0	0	0	0	0	0	0	0	0	0	0	0	0	0
75.0073		0	0	0	0	0	0	0	0	0	0	0	0	0	0
80.0078		0	0	0	0	0	0	0	0	0	0	0	0	0	0
85.0083		0	0	0	0	0	0	0	0	0	0	0	0	0	0
90.0087		0	0	0	0	0	0	0	0	0	0	0	0	0	0
95.0092		0	0	0	0	0	0	0	0	0	0	0	0	0	0
%RH	argon
0		0	0	0	0	0	0	0	0	0	0	0	0	0	0
0.00318445		0	0	0	0	0	0	0	0	0	0	0	0	0	0
0.0318442		0	0	0	0	0	0	0	0	0	0	0	0	0	0
0.159215		0	0	0	0	0	0	0	0	0	0	0	0	0	0
0.318414		0	0	0	0	0	0	0	0	0	0	0	0	0	0
0.636764		0	0	0	0	0	0	0	0	0	0	0	0	0	0
0.95505		0	0	0	0	0	0	0	0	0	0	0	0	0	0
1.27327		0	0	0	0	0	0	0	0	0	0	0	0	0	0
1.59143		0	0	0	0	0	0	0	0	0	0	0	0	0	0
3.18127		0	0	0	0	0	0	0	0	0	0	0	0	0	0
3.81676		0	0	0	0	0	0	0	0	0	0	0	0	0	0
5.0005		0	0	0	0	0	0	0	0	0	0	0	0	0	0
10.001		0	0	0	0	0	0	0	0	0	0	0	0	0	0
15.0015		0	0	0	0	0	0	0	0	0	0	0	0	0	0
20.002		0	0	0	0	0	0	0	0	0	0	0	0	0	0
25.0025		0	0	0	0	0	0	0	0	0	0	0	0	0	0
30.003		0	0	0	0	0	0	0	0	0	0	0	0	0	0
35.0035		0	0	0	0	0	0	0	0	0	0	0	0	0	0
40.004		0	0	0	0	0	0	0	0	0	0	0	0	0	0
45.0044		0	0	0	0	0	0	0	0	0	0	0	0	0	0
50.0049		0	0	0	0	0	0	0	0	0	0	0	0	0	0
55.0054		0	0	0	0	0	0	0	0	0	0	0	0	0	0
60.0059		0	0	0	0	0	0	0	0	0	0	0	0	0	0
65.0064		0	0	0	0	0	0	0	0	0	0	0	0	0	0
70.0068		0	0	0	0	0	0	0	0	0	0	0	0	0	0
75.0073		0	0	0	0	0	0	0	0	0	0	0	0	0	0
80.0078		0	0	0	0	0	0	0	0	0	0	0	0	0	0
85.0083		0	0	0	0	0	0	0	0	0	0	0	0	0	0
90.0087		0	0	0	0	0	0	0	0	0	0	0	0	0	0
95.0092		0	0	0	0	0	0	0	0	0	0	0	0	0	0
	313k
	MOLECULES/UNITCELL
%RH	tip3p
0		0	0	0	0	0	0	0	0	0	0	0	0	0	0
0.00136563		0	0	4	0	7.96432	0.14273	12	0	16	0	31.7788	0.292339	66.3332	0.99215
0.0136562		0	0	4	0	8	0	11.8153	0.667458	16	0	31.9516	0.19357	71.9895	0.650463
0.0682781		0	0	4	0	8	0	12	0	16	0	32	0	74.77	0.785048
0.136549		0	0	4	0	8	0	12	0	16	0	32	0	76.0754	1.12923
0.273071		0	0	4	0	8	0	12	0	16	0	32	0	77.1949	0.494664
0.409566		0	0	4	0	8	0	12	0	16	0	32	0	77.0026	0.639158
0.546033		0	0	3.99511	0.01956	7.99857	0.00574	12	0	16	0	32	0	77.6229	0.59932
0.682473		0	0	4	0	8	0	12	0	16	0	32	0	77.7276	0.899989
1.36426		0	0	4	0	8	0	12	0	16	0	32	0	78.5296	0.413398
1.63679		0	0	4	0	8	0	12	0	16	0	32	0	78.6841	0.39515
5.0005		0	0	4	0	8	0	12	0	16	0	32	0	78.995	0.136299
10.001		0	0	4	0	8	0	12	0	16	0	32	0	78.9094	0.328482
15.0015		0	0	4	0	8	0	12	0	16	0	32	0	79.1695	0.259765
20.002		0	0	4	0	8	0	12	0	16	0	32	0	79.0262	0.481779
25.0025		0	0	4	0	8	0	12	0	16	0	32	0	79.1882	0.233532
30.0029		0	0	4	0	8	0	12	0	16	0	32	0	79.3685	0.415725
35.0034		0	0	4	0	8	0	12	0	16	0	32	0	79.4504	0.296117
40.0039		0	0	4	0	8	0	12	0	16	0	32	0	79.2687	0.197582
45.0044		0	0	4	0	8	0	12	0	16	0	32	0	79.2985	0.415268
50.0048		0	0	4	0	8	0	12	0	16	0	32	0	79.3644	0.304647
55.0053		0	0	4	0	8	0	12	0	16	0	32	0	79.3706	0.557943
60.0057		0	0	4	0	8	0	12	0	16	0	32	0	79.4277	0.497775
65.0062		0	0	4	0	8	0	12	0	16	0	32	0	79.4641	0.390579
70.0066		0	0	4	0	8	0	12	0	16	0	32	0	79.5519	0.308997
75.0071		0	0	4	0	8	0	12	0	16	0	32	0	79.5791	0.493467
80.0075		0	0	4	0	8	0	12	0	16	0	32	0	79.6807	0.390723
85.008		0	0	4	0	8	0	12	0	16	0	32	0	79.2871	0.368816
90.0084		0	0	4	0	8	0	12	0	16	0	32	0	79.4737	0.47718
95.0088		0	0	4	0	8	0	12	0	16	0	32	0	79.6951	0.292513
%RH	N2
0		0	0	0	0	0	0	0	0	0	0	0	0	0	0
0.00136563		0	0	0	0	0	0	0	0	0	0	0	0	0	0
0.0136562		0	0	0	0	0	0	0	0	0	0	0	0	0	0
0.0682781		0	0	0	0	0	0	0	0	0	0	0	0	0	0
0.136549		0	0	0	0	0	0	0	0	0	0	0	0	0	0
0.273071		0	0	0	0	0	0	0	0	0	0	0	0	0	0
0.409566		0	0	0	0	0	0	0	0	0	0	0	0	0	0
0.546033		0	0	0	0	0	0	0	0	0	0	0	0	0	0
0.682473		0	0	0	0	0	0	0	0	0	0	0	0	0	0
1.36426		0	0	0	0	0	0	0	0	0	0	0	0	0	0
1.63679		0	0	0	0	0	0	0	0	0	0	0	0	0	0
5.0005		0	0	0	0	0	0	0	0	0	0	0	0	0	0
10.001		0	0	0	0	0	0	0	0	0	0	0	0	0	0
15.0015		0	0	0	0	0	0	0	0	0	0	0	0	0	0
20.002		0	0	0	0	0	0	0	0	0	0	0	0	0	0
25.0025		0	0	0	0	0	0	0	0	0	0	0	0	0	0
30.0029		0	0	0	0	0	0	0	0	0	0	0	0	0	0
35.0034		0	0	0	0	0	0	0	0	0	0	0	0	0	0
40.0039		0	0	0	0	0	0	0	0	0	0	0	0	0	0
45.0044		0	0	0	0	0	0	0	0	0	0	0	0	0	0
50.0048		0	0	0	0	0	0	0	0	0	0	0	0	0	0
55.0053		0	0	0	0	0	0	0	0	0	0	0	0	0	0
60.0057		0	0	0	0	0	0	0	0	0	0	0	0	0	0
65.0062		0	0	0	0	0	0	0	0	0	0	0	0	0	0
70.0066		0	0	0	0	0	0	0	0	0	0	0	0	0	0
75.0071		0	0	0	0	0	0	0	0	0	0	0	0	0	0
80.0075		0	0	0	0	0	0	0	0	0	0	0	0	0	0
85.008		0	0	0	0	0	0	0	0	0	0	0	0	0	0
90.0084		0	0	0	0	0	0	0	0	0	0	0	0	0	0
95.0088		0	0	0	0	0	0	0	0	0	0	0	0	0	0
%RH	O2
0		0	0	0	0	0	0	0	0	0	0	0	0	7.5e-06	1.22474e-05
0.00136563		0	0	0	0	0	0	0	0	0	0	0	0	0	0
0.0136562		0	0	0	0	0	0	0	0	0	0	0	0	0	0
0.0682781		0	0	0	0	0	0	0	0	0	0	0	0	0	0
0.136549		0	0	0	0	0	0	0	0	0	0	0	0	0	0
0.273071		0	0	0	0	0	0	0	0	0	0	0	0	0	0
0.409566		0	0	0	0	0	0	0	0	0	0	0	0	0	0
0.546033		0	0	0	0	0	0	0	0	0	0	0	0	0	0
0.682473		0	0	0	0	0	0	0	0	0	0	0	0	0	0
1.36426		0	0	0	0	0	0	0	0	0	0	0	0	0	0
1.63679		0	0	0	0	0	0	0	0	0	0	0	0	0	0
5.0005		0	0	0	0	0	0	0	0	0	0	0	0	0	0
10.001		0	0	0	0	0	0	0	0	0	0	0	0	0	0
15.0015		0	0	0	0	0	0	0	0	0	0	0	0	0	0
20.002		0	0	0	0	0	0	0	0	0	0	0	0	0	0
25.0025		0	0	0	0	0	0	0	0	0	0	0	0	0	0
30.0029		0	0	0	0	0	0	0	0	0	0	0	0	0	0
35.0034		0	0	0	0	0	0	0	0	0	0	0	0	0	0
40.0039		0	0	0	0	0	0	0	0	0	0	0	0	0	0
45.0044		0	0	0	0	0	0	0	0	0	0	0	0	0	0
50.0048		0	0	0	0	0	0	0	0	0	0	0	0	0	0
55.0053		0	0	0	0	0	0	0	0	0	0	0	0	0	0
60.0057		0	0	0	0	0	0	0	0	0	0	0	0	0	0
65.0062		0	0	0	0	0	0	0	0	0	0	0	0	0	0
70.0066		0	0	0	0	0	0	0	0	0	0	0	0	0	0
75.0071		0	0	0	0	0	0	0	0	0	0	0	0	0	0
80.0075		0	0	0	0	0	0	0	0	0	0	0	0	0	0
85.008		0	0	0	0	0	0	0	0	0	0	0	0	0	0
90.0084		0	0	0	0	0	0	0	0	0	0	0	0	0	0
95.0088		0	0	0	0	0	0	0	0	0	0	0	0	0	0
%RH	argon
0		0	0	0	0	0	0	0	0	0	0	0	0	0	0
0.00136563		0	0	0	0	0	0	0	0	0	0	0	0	0	0
0.0136562		0	0	0	0	0	0	0	0	0	0	0	0	0	0
0.0682781		0	0	0	0	0	0	0	0	0	0	0	0	0	0
0.136549		0	0	0	0	0	0	0	0	0	0	0	0	0	0
0.273071		0	0	0	0	0	0	0	0	0	0	0	0	0	0
0.409566		0	0	0	0	0	0	0	0	0	0	0	0	0	0
0.546033		0	0	0	0	0	0	0	0	0	0	0	0	0	0
0.682473		0	0	0	0	0	0	0	0	0	0	0	0	0	0
1.36426		0	0	0	0	0	0	0	0	0	0	0	0	0	0
1.63679		0	0	0	0	0	0	0	0	0	0	0	0	0	0
5.0005		0	0	0	0	0	0	0	0	0	0	0	0	0	0
10.001		0	0	0	0	0	0	0	0	0	0	0	0	0	0
15.0015		0	0	0	0	0	0	0	0	0	0	0	0	0	0
20.002		0	0	0	0	0	0	0	0	0	0	0	0	0	0
25.0025		0	0	0	0	0	0	0	0	0	0	0	0	0	0
30.0029		0	0	0	0	0	0	0	0	0	0	0	0	0	0
35.0034		0	0	0	0	0	0	0	0	0	0	0	0	0	0
40.0039		0	0	0	0	0	0	0	0	0	0	0	0	0	0
45.0044		0	0	0	0	0	0	0	0	0	0	0	0	0	0
50.0048		0	0	0	0	0	0	0	0	0	0	0	0	0	0
55.0053		0	0	0	0	0	0	0	0	0	0	0	0	0	0
60.0057		0	0	0	0	0	0	0	0	0	0	0	0	0	0
65.0062		0	0	0	0	0	0	0	0	0	0	0	0	0	0
70.0066		0	0	0	0	0	0	0	0	0	0	0	0	0	0
75.0071		0	0	0	0	0	0	0	0	0	0	0	0	0	0
80.0075		0	0	0	0	0	0	0	0	0	0	0	0	0	0
85.008		0	0	0	0	0	0	0	0	0	0	0	0	0	0
90.0084		0	0	0	0	0	0	0	0	0	0	0	0	0	0
95.0088		0	0	0	0	0	0	0	0	0	0	0	0	0	0

## Sheet: surface
MoS2 with defects on basal surface
		278k	surface 1% defects		2% defects		3% defects		4% defects (not adj)		5% defects (adj)		4% defects (adj)		5% defects (not adj)
		MOL/KG
	%RH	tip3p	Uptake	err +/-	Uptake	err +/-	Uptake	err +/-	Uptake	err +/-	Uptake	err +/-	Uptake	err +/-	Uptake	err +/-
	0		0	0	0	0	0	0	0	0	0	0	0	0	0	0
	0.0116767		0.0208442	1.69933e-05	0.0417109	1.26084e-05	0.0626039	9.2615e-06	0.0835276	5.9362e-06	0.103919	0.00235443	0.0835438	5.06726e-05	0.104477	1.532e-06
	0.116766		0.0208632	4.0011e-05	0.0417517	2.77377e-05	0.0626536	4.69127e-05	0.0835897	2.54793e-05	0.104771	0.000235085	0.083812	0.000363193	0.104561	4.42472e-05
	0.583806		0.02094	3.36876e-05	0.0418983	0.000105636	0.0628356	0.000118648	0.083809	5.44984e-05	0.105927	0.000484644	0.0844757	0.00042461	0.104778	0.000110864
	1.16755		0.0210288	0.000113778	0.0419747	0.000157573	0.0631778	0.000291182	0.0841153	0.000118408	0.107046	0.000773466	0.0858341	0.00245426	0.105114	0.000123199
	2.33487		0.0212676	7.4649e-05	0.0424036	0.000371358	0.0635718	0.000577054	0.0847803	0.000420264	0.109488	0.000536853	0.0885636	0.00429822	0.105806	0.000273587
	3.50196		0.0214258	0.000581609	0.0429331	0.000990887	0.0639891	0.000525702	0.085285	0.000392951	0.111668	0.00162271	0.0906699	0.00253295	0.106644	0.000415596
	4.66881		0.0213754	0.000285375	0.0431651	0.000601918	0.0644608	0.000606618	0.0859858	0.000553066	0.114084	0.00161167	0.0929231	0.00324578	0.106998	0.000436128
	5.00283		0.0217471	0.000561729	0.042923	0.000810552	0.0650671	0.000875973	0.0862073	0.00048279	0.114048	0.00179222	0.0936516	0.00559025	0.107319	0.000707238
	5.83543		0.0218897	0.000680884	0.0435493	0.00127342	0.0645129	0.000640099	0.0867236	0.000657374	0.116401	0.00170693	0.0957241	0.00282901	0.107738	0.000508645
	10.0057		0.0222438	0.000482108	0.0445818	0.00117871	0.0665758	0.000698378	0.0885192	0.000846866	0.120718	0.00209873	0.101195	0.00592906	0.109756	0.000772378
	11.665		0.0225845	0.000689556	0.0447819	0.00174293	0.0671632	0.00126798	0.0896613	0.000850834	0.12357	0.00169665	0.102591	0.0030979	0.110618	0.001608
	13.9952		0.0231146	0.00130925	0.0456444	0.00138523	0.0672018	0.00178623	0.0907644	0.000998613	0.125554	0.000947546	0.103682	0.00650229	0.111744	0.00217098
	15.0085		0.0237532	0.00152447	0.0460453	0.00122025	0.0677966	0.00102279	0.0911273	0.000588572	0.126839	0.00266837	0.107298	0.00587606	0.112374	0.000589452
	20.0113		0.0235993	0.00126876	0.047014	0.00182892	0.070994	0.00300187	0.0940327	0.00154064	0.130893	0.00172997	0.110928	0.0025722	0.11528	0.00149567
	25.0142		0.0248613	0.00148705	0.0485662	0.00223497	0.0714614	0.00333152	0.0952093	0.00231982	0.13518	0.00195282	0.111605	0.00517337	0.11751	0.000723824
	30.017		0.0246855	0.00166264	0.0493901	0.00302629	0.0734584	0.00134011	0.0972925	0.00165108	0.139489	0.00210897	0.116766	0.00602256	0.119168	0.000970894
	35.0198		0.0258766	0.00214677	0.0491692	0.0020453	0.074981	0.00367834	0.0993955	0.00341679	0.142632	0.00334131	0.120606	0.0064048	0.122319	0.00157775
	40.0227		0.0267586	0.00316496	0.0519019	0.00261143	0.0754496	0.00469123	0.100274	0.00238498	0.144537	0.00422917	0.119687	0.00478497	0.124019	0.000326459
	45.0255		0.0273677	0.00133847	0.0534055	0.00255796	0.0782333	0.00181775	0.103558	0.00300013	0.146598	0.00349804	0.122559	0.00683882	0.12575	0.00169748
	50.0283		0.0275262	0.00176142	0.0532404	0.00315937	0.0794353	0.0050912	0.10443	0.00202899	0.150407	0.00293012	0.124396	0.0039467	0.127834	0.00219952
	55.0312		0.0276473	0.00261294	0.0537196	0.00280512	0.0792474	0.0045876	0.107036	0.00170021	0.153139	0.00342435	0.126898	0.00360459	0.129566	0.00242828
	60.034		0.0287967	0.00398337	0.0555732	0.00567653	0.083265	0.00656059	0.108942	0.00336277	0.153924	0.00208388	0.12885	0.00547851	0.130537	0.00284403
	65.0368		0.0282615	0.00230518	0.0558031	0.00388888	0.0866811	0.00534176	0.109833	0.00175449	0.158127	0.00219349	0.129601	0.00909311	0.132697	0.00170828
	70.0396		0.0292875	0.00262663	0.0570273	0.00240753	0.0859297	0.00317442	0.112283	0.00290627	0.159361	0.00488275	0.131501	0.00826032	0.136828	0.00323567
	75.0425		0.030672	0.00352686	0.0590923	0.00159111	0.083647	0.0050369	0.113031	0.00370035	0.161712	0.00682283	0.135842	0.00939793	0.139045	0.00389451
	80.0453		0.030513	0.00300545	0.0571186	0.00399441	0.0868493	0.00463652	0.113411	0.00385092	0.162033	0.00472333	0.138107	0.00444876	0.13886	0.00181539
	85.0481		0.0313748	0.00221549	0.0585558	0.00306951	0.0885512	0.00376046	0.116006	0.00303965	0.165163	0.00635999	0.137664	0.00801166	0.139328	0.00503679
	90.051		0.0312891	0.00446528	0.0604695	0.00377527	0.0883324	0.00396403	0.117864	0.00088226	0.166105	0.00326152	0.139671	0.00629007	0.142784	0.00203086
	95.0538		0.0320216	0.00430707	0.0614132	0.00259204	0.0872039	0.00603749	0.118712	0.00207362	0.168176	0.00329647	0.142094	0.0103817	0.144326	0.00495459
	%RH	N2
	0		0.0170527	0.000198206	0.0170761	0.000202241	0.0172165	0.00023199	0.0171976	0.000111536	0.017216	0.000179561	0.0171401	0.000104388	0.0172393	7.89931e-05
	0.0116767		0.017019	0.000231743	0.0170844	0.000191799	0.0171844	0.000204134	0.0171922	8.28903e-05	0.0171651	0.000121119	0.0171299	0.000119398	0.0172014	0.000101723
	0.116766		0.0170463	0.000194848	0.0171716	0.00031453	0.017093	0.00019226	0.017112	8.95279e-05	0.0172175	3.56325e-05	0.0171298	0.000225595	0.0172031	0.000148732
	0.583806		0.0170467	0.000123991	0.0170257	0.000233089	0.0171611	0.000196489	0.0171788	0.000113836	0.0171623	0.000118449	0.0171549	0.000269778	0.017202	0.000138611
	1.16755		0.0170275	0.00031512	0.0170823	0.000135088	0.0171136	0.00051388	0.017175	0.000161456	0.017183	7.24775e-05	0.0171506	0.000147373	0.0172013	7.21995e-05
	2.33487		0.0171084	0.000310579	0.0170885	0.000239257	0.0171594	0.00036581	0.017204	0.000146189	0.017156	0.000155731	0.0171806	0.000380622	0.0171798	5.92589e-05
	3.50196		0.0170193	0.000322683	0.0170409	0.000242051	0.0171215	0.000150755	0.0171798	0.000108747	0.0171519	6.08656e-05	0.0171172	8.76105e-05	0.0171993	0.000143949
	4.66881		0.017011	0.000275015	0.0170667	0.000380079	0.0172019	0.000170956	0.0171263	9.64329e-05	0.0171517	7.89808e-05	0.0170265	0.00029586	0.0171827	5.27345e-05
	5.00283		0.0170255	0.000265126	0.017001	0.000196355	0.0171011	0.000225892	0.0171612	7.60648e-05	0.0171475	5.46537e-05	0.0171805	0.00027067	0.0171515	7.17419e-05
	5.83543		0.017044	0.000130044	0.0170019	0.000196012	0.017221	0.000249615	0.0171636	0.000111061	0.0171144	6.78451e-05	0.0170834	0.000145866	0.0171877	9.12811e-05
	10.0057		0.0169984	0.000179618	0.0170085	0.000306641	0.0170596	0.000176573	0.0171474	0.000105439	0.0171252	9.22265e-05	0.0171025	0.0002472	0.0171673	9.80329e-05
	11.665		0.0169933	0.000302928	0.017007	0.000159311	0.0170556	0.000200018	0.0171088	7.45601e-05	0.0170946	6.76713e-05	0.0170516	0.000148057	0.0172036	9.68639e-05
	13.9952		0.0170368	0.000243986	0.0169971	0.000181326	0.0170609	0.000126182	0.0171067	2.96803e-05	0.0170716	9.80396e-05	0.0170288	0.000156587	0.0171277	8.45792e-05
	15.0085		0.017053	0.000287351	0.017047	0.000118953	0.0170651	0.00029372	0.0171149	5.63249e-05	0.0171019	0.000136451	0.0170849	0.000167408	0.0171198	0.000130316
	20.0113		0.0170183	0.000162765	0.0169892	0.000211201	0.0169995	0.000279167	0.0171226	0.000118847	0.0170443	7.7047e-05	0.0170472	0.000205202	0.0171075	5.93439e-05
	25.0142		0.0169532	3.77919e-05	0.0170832	0.00024083	0.0170342	8.77243e-05	0.0170916	7.17764e-05	0.0170807	5.3438e-05	0.0170072	0.000180088	0.0171331	6.4501e-05
	30.017		0.0169483	0.000318445	0.0169248	0.000266064	0.0170624	9.83381e-05	0.0171005	6.89539e-05	0.0170351	5.98654e-05	0.0168941	0.000348681	0.0171207	0.000122508
	35.0198		0.0169261	0.000254454	0.01695	5.84404e-05	0.0171139	0.000241414	0.0170388	8.9735e-05	0.0169985	5.69429e-05	0.0170481	0.000266779	0.0170729	0.000133099
	40.0227		0.0168843	0.000158335	0.0170641	0.00018012	0.0170205	0.000159673	0.017054	0.000140213	0.0170527	0.000101144	0.0169632	0.000157537	0.0170808	7.04702e-05
	45.0255		0.0169624	0.000200853	0.0169268	0.000156169	0.0170542	0.000231391	0.0170285	0.000198633	0.0169898	6.78521e-05	0.0170206	0.000275517	0.0170819	0.000166272
	50.0283		0.0169217	0.000170976	0.0169417	0.00023331	0.0169617	0.00029968	0.0170234	0.000132085	0.0169744	3.04519e-05	0.0169268	0.000127878	0.0170692	8.09316e-05
	55.0312		0.0169028	0.00019791	0.0170393	6.72781e-05	0.0170135	0.000198403	0.0170507	0.00010524	0.0169696	6.55106e-05	0.0169529	0.00012854	0.0170366	8.20275e-05
	60.034		0.0169668	0.000145472	0.0168731	0.000211426	0.0170885	0.000256112	0.0169813	9.74858e-05	0.0169321	0.000180484	0.0169507	0.000271274	0.0170415	6.62576e-05
	65.0368		0.016947	0.000402776	0.0169354	0.000193987	0.0168828	0.00014683	0.0170149	8.58724e-05	0.0169333	8.96723e-05	0.0168717	0.000137264	0.0170072	0.00010407
	70.0396		0.0168846	0.000248189	0.0169331	0.000180486	0.016947	6.37932e-05	0.0169512	0.000162913	0.0169186	6.64226e-05	0.0169793	0.000146451	0.0169878	0.000139218
	75.0425		0.017029	0.000223983	0.0169588	0.000237656	0.0168229	0.00026062	0.0169478	3.65805e-05	0.0169196	0.000115441	0.016829	0.000221849	0.016949	0.00012128
	80.0453		0.0169885	0.000294801	0.0169396	0.000303026	0.01692	0.000265796	0.0169452	5.14605e-05	0.0169281	5.13547e-05	0.0168634	0.000282808	0.0169523	3.33886e-05
	85.0481		0.0167865	9.8595e-05	0.0169988	0.000324867	0.0168558	9.20404e-05	0.0169523	0.000106927	0.0168959	5.13175e-05	0.0169042	0.000252084	0.0169649	7.14448e-05
	90.051		0.0168925	0.000316862	0.0169665	6.00188e-05	0.0168022	0.000294163	0.0169462	9.89281e-05	0.016914	8.96743e-05	0.016846	0.00021354	0.0169449	0.000142931
	95.0538		0.0167919	0.000198617	0.0167443	0.000150089	0.0168452	0.00028412	0.0169606	9.18768e-05	0.0168376	9.49109e-05	0.0168559	0.000131643	0.0169144	8.51154e-05
	%RH	O2
	0		0.00474607	9.31143e-05	0.00474987	0.000123538	0.00479311	9.97763e-05	0.00475565	4.42984e-05	0.00473017	1.80607e-05	0.00474047	6.45585e-05	0.00474172	3.32866e-05
	0.0116767		0.00475545	0.000104674	0.00475602	7.20765e-05	0.00474992	0.000103198	0.0047133	2.27396e-05	0.00472664	3.56238e-05	0.00475676	0.000112401	0.00473247	4.80459e-05
	0.116766		0.00477754	0.000116944	0.004726	5.6095e-05	0.00474272	3.9141e-05	0.00472756	3.2063e-05	0.00473736	4.26366e-05	0.00475143	0.000103149	0.00473616	3.83054e-05
	0.583806		0.00477275	8.90334e-05	0.00474007	7.19503e-05	0.00476588	7.73578e-05	0.00473715	2.82768e-05	0.00473059	6.74308e-05	0.00474381	0.00018848	0.00473493	4.07286e-05
	1.16755		0.00480369	7.94939e-05	0.00476207	0.000123723	0.00473458	6.47766e-05	0.00475371	5.08153e-05	0.00472285	3.42744e-05	0.0047603	0.000165039	0.00472513	3.92446e-05
	2.33487		0.0047368	3.40287e-05	0.00472652	0.000126047	0.00473844	0.000126142	0.00475283	4.66689e-05	0.00473036	5.07013e-05	0.0047981	0.000101747	0.00472998	4.44215e-05
	3.50196		0.00476014	6.02784e-05	0.00469274	9.21182e-05	0.00471059	0.000102833	0.00473385	4.08083e-05	0.00472304	4.32586e-05	0.00472658	0.000106241	0.00473013	4.61179e-05
	4.66881		0.00475733	9.84416e-05	0.00474622	0.000184328	0.00471716	0.000133058	0.00473882	4.43094e-05	0.00471437	4.74184e-05	0.00472794	0.000109052	0.00473796	4.05041e-05
	5.00283		0.00476254	7.95458e-05	0.00473246	6.36358e-05	0.00475003	0.000116786	0.00473312	3.43588e-05	0.00470516	3.76418e-05	0.00474224	0.000115031	0.00473105	5.59979e-05
	5.83543		0.00474514	0.000112739	0.00476645	6.70087e-05	0.00476839	0.000102648	0.00473168	4.08949e-05	0.00472122	3.59574e-05	0.00470361	7.54229e-05	0.00472225	4.61343e-05
	10.0057		0.00479088	9.05154e-05	0.00476416	6.9958e-05	0.004747	6.66628e-05	0.00471892	4.33911e-05	0.00470278	3.89706e-05	0.0047175	0.00013379	0.0047254	3.82561e-05
	11.665		0.00475701	9.29066e-05	0.00478261	0.000134076	0.00472092	7.63761e-05	0.00471998	3.85568e-05	0.00473029	2.04408e-05	0.0047672	0.000138952	0.00472764	4.6054e-05
	13.9952		0.00472919	0.000107152	0.00470733	0.000126603	0.00475618	9.15951e-05	0.00472715	3.01334e-05	0.00470831	6.02068e-05	0.00472888	0.000159397	0.00473652	3.83513e-05
	15.0085		0.00478629	9.13302e-05	0.00477239	0.000112897	0.0047205	4.43626e-05	0.00473696	3.89352e-05	0.00470775	6.67641e-05	0.00471823	7.75294e-05	0.00471021	5.3949e-05
	20.0113		0.00475118	0.000146305	0.00471557	7.32262e-05	0.00473688	6.05363e-05	0.00472658	5.97504e-05	0.00472967	3.87249e-05	0.00477252	8.81799e-05	0.00471335	2.81027e-05
	25.0142		0.00471846	7.94857e-05	0.00479721	0.000142102	0.00472384	3.99557e-05	0.00473051	2.418e-05	0.00469878	4.85693e-05	0.0047484	0.000131824	0.00472354	5.16608e-05
	30.017		0.00474899	7.10021e-05	0.0047309	5.749e-05	0.00471361	0.000164171	0.00470052	5.58373e-05	0.00469943	4.51135e-05	0.00473441	0.000115777	0.00471216	5.52491e-05
	35.0198		0.0047442	0.000117848	0.00467251	0.000155161	0.00471236	0.000158856	0.00469856	2.33243e-05	0.00469653	5.7363e-05	0.00471907	9.08365e-05	0.00470215	3.58837e-05
	40.0227		0.0047169	8.22511e-05	0.00469023	0.000133252	0.00470245	4.13323e-05	0.00471783	4.94147e-05	0.0047044	4.51536e-05	0.00473942	6.16356e-05	0.00470359	4.74813e-05
	45.0255		0.00472544	9.47238e-05	0.00470525	6.58072e-05	0.0047084	0.000115535	0.00469391	7.79357e-05	0.00469038	4.09123e-05	0.00470643	6.40826e-05	0.00469701	2.84024e-05
	50.0283		0.00473159	3.52263e-05	0.00470504	4.60296e-05	0.00473396	0.000109562	0.0047042	5.10597e-05	0.00470975	3.13676e-05	0.0046843	3.69329e-05	0.00471824	4.08349e-05
	55.0312		0.00473138	7.37842e-05	0.00472912	0.000115381	0.00472019	8.0203e-05	0.00468159	3.79023e-05	0.00467998	3.51613e-05	0.00468524	7.85851e-05	0.00471216	3.72026e-05
	60.034		0.00470263	6.7045e-05	0.00470681	0.000117607	0.00471664	9.99729e-05	0.00468227	1.51774e-05	0.00467227	4.87302e-05	0.00470257	4.55537e-05	0.00470658	6.25011e-05
	65.0368		0.00471575	9.30037e-05	0.00471515	0.000105766	0.00473031	0.000126581	0.00469439	2.16499e-05	0.00467603	5.07493e-05	0.00469986	0.000145066	0.00469889	6.27849e-05
	70.0396		0.00474243	7.54901e-05	0.00471192	9.04131e-05	0.00464945	8.16444e-05	0.00468382	1.57026e-05	0.00466907	4.05349e-05	0.00473233	8.00963e-05	0.00468182	2.61029e-05
	75.0425		0.00471992	8.01592e-05	0.00470817	0.000104945	0.00464945	4.54313e-05	0.00468086	4.73112e-05	0.00468443	4.16831e-05	0.00467918	0.00010357	0.0046804	2.3384e-05
	80.0453		0.00473065	7.36505e-05	0.00473403	0.000102039	0.00469671	0.000109175	0.00468923	3.90735e-05	0.00466692	2.29513e-05	0.00467344	0.000101102	0.00469632	1.70378e-05
	85.0481		0.00470836	1.79187e-05	0.00472714	0.000134613	0.00467511	3.31375e-05	0.00468225	3.61411e-05	0.0046651	3.27097e-05	0.00463565	5.25447e-05	0.00468173	3.2002e-05
	90.051		0.00476035	0.000186295	0.00471567	7.72987e-05	0.00464841	6.85848e-05	0.00469117	4.0359e-05	0.00466477	3.7877e-05	0.00464849	4.88261e-05	0.00466456	4.49814e-05
	95.0538		0.00468887	0.000144155	0.00470087	8.42284e-05	0.00467272	0.000155006	0.00468196	2.0838e-05	0.00466172	3.42082e-05	0.00471844	0.000111081	0.00467453	2.42117e-05
	%RH	argon
	0		0.000224848	2.4968e-05	0.000222704	1.80274e-05	0.000222853	1.50383e-05	0.000224443	8.3953e-06	0.000225116	5.8897e-06	0.00022864	1.0461e-05	0.000222796	7.9229e-06
	0.0116767		0.00022068	1.51792e-05	0.000222913	7.5358e-06	0.000227339	1.73756e-05	0.000222731	2.3236e-06	0.000224677	1.31834e-05	0.000223629	1.81983e-05	0.000221626	8.9934e-06
	0.116766		0.000224326	1.06786e-05	0.000223434	1.56407e-05	0.000218993	1.70722e-05	0.000222668	9.2039e-06	0.000223737	1.02995e-05	0.000219139	2.31706e-05	0.000224071	6.2619e-06
	0.583806		0.000223701	1.47586e-05	0.000225519	2.0607e-05	0.000224209	1.46867e-05	0.000223211	7.9838e-06	0.000221605	8.2921e-06	0.000221227	1.27934e-05	0.000224677	5.9768e-06
	1.16755		0.000224743	1.83284e-05	0.000232505	2.55984e-05	0.000215863	2.17291e-05	0.000218534	8.644e-06	0.000222274	9.1684e-06	0.000220705	2.79547e-05	0.000219955	7.9273e-06
	2.33487		0.000226619	1.48963e-05	0.000227292	2.0131e-05	0.000225774	1.51824e-05	0.000221353	1.21411e-05	0.000225513	4.5712e-06	0.000224673	1.57311e-05	0.000224489	5.7517e-06
	3.50196		0.000222972	2.46741e-05	0.000220827	2.0533e-05	0.000229426	2.58979e-05	0.000223733	9.5813e-06	0.000224071	9.6959e-06	0.000224568	1.80516e-05	0.000222796	5.7702e-06
	4.66881		0.000229224	1.84394e-05	0.000219263	2.48275e-05	0.000232765	2.62983e-05	0.000223566	1.07517e-05	0.000222107	3.188e-06	0.000227283	3.30385e-05	0.000223779	5.4758e-06
	5.00283		0.000218075	1.22859e-05	0.000222808	2.26093e-05	0.000221392	2.32602e-05	0.000219703	7.5535e-06	0.000226516	8.2879e-06	0.000218409	1.85659e-05	0.000225972	9.0538e-06
	5.83543		0.00022516	2.01542e-05	0.000224581	2.6289e-05	0.000222957	2.28827e-05	0.000219787	7.7819e-06	0.000222859	1.03408e-05	0.000221019	1.66599e-05	0.000225471	8.4764e-06
	10.0057		0.000226619	2.23176e-05	0.000224894	4.34142e-05	0.000214402	1.85699e-05	0.000223044	1.0037e-05	0.000222023	8.9533e-06	0.000223838	2.45768e-05	0.000221543	6.3823e-06
	11.665		0.000224952	2.36992e-05	0.000223955	1.85762e-05	0.000223062	2.84549e-05	0.000224276	9.6271e-06	0.000223173	9.5836e-06	0.000222585	2.41491e-05	0.00022171	1.13065e-05
	13.9952		0.000216616	1.4368e-05	0.000221244	1.266e-05	0.000223062	1.56512e-05	0.000220726	9.2586e-06	0.000222002	1.14038e-05	0.000231772	1.47646e-05	0.000221794	5.0924e-06
	15.0085		0.000221097	1.45512e-05	0.000231879	2.46412e-05	0.000222644	6.5122e-06	0.00022367	1.24511e-05	0.000225199	1.23214e-05	0.000226552	1.80225e-05	0.000223381	1.14895e-05
	20.0113		0.000227556	2.92957e-05	0.000224164	1.85341e-05	0.000222123	1.94114e-05	0.000217907	6.5823e-06	0.000222984	6.2398e-06	0.000221854	8.8094e-06	0.000223904	6.5348e-06
	25.0142		0.000222347	1.96745e-05	0.000226562	2.41078e-05	0.000225566	1.59951e-05	0.000225466	6.1071e-06	0.000222859	9.1444e-06	0.000215694	1.69684e-05	0.000224719	7.501e-06
	30.017		0.000222555	2.06122e-05	0.000212695	1.55487e-05	0.000227548	5.7676e-06	0.000221603	7.9615e-06	0.000223173	7.7522e-06	0.000219035	2.3721e-05	0.000227456	9.558e-06
	35.0198		0.000217033	2.34338e-05	0.000230002	2.10331e-05	0.000219827	2.45e-05	0.000224234	8.9249e-06	0.000221229	1.1708e-05	0.000224359	1.35385e-05	0.00022242	6.7705e-06
	40.0227		0.000232662	3.8762e-06	0.000229377	1.47006e-05	0.000224105	1.36607e-05	0.000222397	4.7677e-06	0.000222023	5.4235e-06	0.000216112	9.0294e-06	0.000221626	9.008e-06
	45.0255		0.000226306	1.88078e-05	0.000223225	2.39703e-05	0.000229843	2.91951e-05	0.000220998	8.7173e-06	0.000220519	1.05878e-05	0.000222063	2.31819e-05	0.000218471	4.2192e-06
	50.0283		0.000228494	9.4718e-06	0.00022406	2.05838e-05	0.000233286	1.65411e-05	0.000224151	9.0023e-06	0.000219767	1.23589e-05	0.000221958	2.40115e-05	0.000218534	1.06814e-05
	55.0312		0.000233495	2.19785e-05	0.000228334	1.31387e-05	0.000228591	1.8303e-05	0.000225759	5.5788e-06	0.000224217	1.03577e-05	0.00023031	2.22883e-05	0.000223298	8.0334e-06
	60.034		0.000223285	2.66097e-05	0.000224581	2.05521e-05	0.000225983	1.52682e-05	0.000221374	8.7843e-06	0.000218785	5.9163e-06	0.000219766	2.09117e-05	0.000225325	4.3174e-06
	65.0368		0.000221617	3.19421e-05	0.000227917	3.2287e-05	0.000223688	1.54101e-05	0.000218805	3.0756e-06	0.000221585	8.3462e-06	0.000218617	1.92213e-05	0.000222964	4.1356e-06
	70.0396		0.000219846	7.338e-06	0.000223642	1.36101e-05	0.000216697	9.299e-06	0.000223817	7.8677e-06	0.000219725	9.8593e-06	0.000223211	2.16653e-05	0.000219432	4.1634e-06
	75.0425		0.000225577	2.04494e-05	0.000221349	1.9367e-05	0.000217532	1.31475e-05	0.000221102	7.1476e-06	0.000218973	1.01134e-05	0.000222794	3.75696e-05	0.000223005	7.655e-06
	80.0453		0.000219534	2.12164e-05	0.000225519	2.65294e-05	0.000224627	1.957e-05	0.000220831	5.9754e-06	0.000218806	6.3549e-06	0.000217469	5.5481e-06	0.000224029	9.089e-06
	85.0481		0.000217867	1.51047e-05	0.000228439	1.81835e-05	0.000223583	1.91539e-05	0.000222209	8.8397e-06	0.000222044	7.1122e-06	0.000213606	1.38725e-05	0.000225283	4.0008e-06
	90.051		0.000212761	9.9197e-06	0.000219055	1.65957e-05	0.000215028	6.6117e-06	0.000216738	6.8084e-06	0.000220582	3.5078e-06	0.000216216	1.46222e-05	0.000219265	5.3146e-06
	95.0538		0.000229015	1.01362e-05	0.00022896	2.33826e-05	0.000220871	1.94472e-05	0.000221916	6.1978e-06	0.000220707	7.0394e-06	0.000223002	2.79469e-05	0.000222107	1.29511e-05
		298k
		MOL/KG
	%RH	tip3p
	0		0	0	0	0	0	0	0	0	0	0	0	0	0	0
	0.00318445		0.0208394	1.6671e-06	0.041707	6.821e-06	0.0626002	2.1885e-06	0.0835234	2.4401e-06	0.102057	0.0046149	0.0835402	5.53625e-05	0.104473	2.06e-06
	0.0318442		0.0208409	3.9866e-06	0.0417177	8.5876e-06	0.0626078	5.3444e-06	0.0835465	7.7495e-06	0.104463	0.000444379	0.0836187	9.72823e-05	0.104489	4.5529e-06
	0.159215		0.0208934	9.11041e-05	0.0417559	4.09016e-05	0.0626909	0.000135793	0.0836324	3.41552e-05	0.104885	0.000414472	0.083961	0.000468683	0.104589	3.41716e-05
	0.318414		0.0208933	3.4928e-05	0.0417774	4.71025e-05	0.0627486	9.49882e-05	0.0837274	8.57878e-05	0.105203	0.000240011	0.0842839	0.000698772	0.104679	6.20703e-05
	0.636764		0.0209484	0.00015853	0.0419779	0.00022903	0.0628978	0.000134345	0.0838893	5.75796e-05	0.106132	0.000751611	0.085265	0.00177517	0.104899	0.00011839
	0.95505		0.0210784	0.000240058	0.0419647	0.000217611	0.063116	0.000250947	0.0840533	9.15213e-05	0.106661	0.00019629	0.0856658	0.000740634	0.105198	0.000195072
	1.27327		0.0210795	0.000232708	0.0420766	0.000213161	0.0631836	0.000325828	0.0841589	0.000144967	0.107446	0.000681506	0.0865196	0.0014474	0.105354	0.000222972
	1.59143		0.0211319	0.00024287	0.0423707	0.000367755	0.0635143	0.000485235	0.0844959	0.000114213	0.108359	0.000807691	0.087483	0.000912357	0.105532	0.000100135
	3.18127		0.0217355	0.000534815	0.0427813	0.000229254	0.0645358	0.000262987	0.085459	0.000325573	0.11184	0.000942517	0.0908305	0.00590886	0.106656	0.000334817
	3.81676		0.0216182	0.000491235	0.043097	0.000243418	0.0644901	0.000812978	0.0858156	0.000220705	0.112529	0.00285523	0.0905445	0.00342266	0.106983	0.000319751
	5.0005		0.021831	0.000495957	0.0436179	0.00123387	0.0649428	0.000718218	0.0864827	0.000185912	0.114602	0.00157897	0.094638	0.00413813	0.107694	0.000829594
	10.001		0.0229633	0.000546263	0.0458461	0.00105497	0.067073	0.00163681	0.0892056	0.000672348	0.121231	0.00198938	0.101774	0.00439988	0.110968	0.00111796
	15.0015		0.0235402	0.000668336	0.0463168	0.00172276	0.0695099	0.00230292	0.0921959	0.000607931	0.128008	0.00355614	0.106109	0.00528072	0.114049	0.00216922
	20.002		0.0246286	0.00148182	0.0484523	0.00144197	0.0716586	0.0050679	0.0954991	0.000601258	0.132398	0.00286448	0.110661	0.00435714	0.1168	0.00163498
	25.0025		0.0248674	0.00141327	0.0485333	0.000753237	0.0745109	0.00100917	0.0976383	0.00150285	0.136383	0.0017586	0.116205	0.00357081	0.119044	0.00134742
	30.003		0.0269061	0.00132944	0.0504516	0.003768	0.0768788	0.00409618	0.0998574	0.00196797	0.139992	0.00606094	0.116254	0.003608	0.121516	0.0017156
	35.0035		0.026507	0.00155018	0.05152	0.00301039	0.077381	0.00424541	0.102237	0.0023345	0.144334	0.00290826	0.120256	0.00370286	0.124646	0.00234433
	40.004		0.0280571	0.0017102	0.0535225	0.00473833	0.0779341	0.00242115	0.103327	0.00278043	0.147664	0.00510369	0.122271	0.00453479	0.125986	0.00263378
	45.0044		0.0279355	0.00297835	0.0553912	0.0036058	0.0799193	0.00431916	0.106869	0.00273136	0.150208	0.0021868	0.128223	0.00330277	0.130057	0.00293964
	50.0049		0.0284685	0.00292526	0.0556254	0.00298666	0.0801412	0.00470988	0.107766	0.00104451	0.153473	0.00218484	0.129272	0.00570858	0.132001	0.00183209
	55.0054		0.0290982	0.00238	0.057292	0.00274099	0.0845415	0.00557217	0.110429	0.00514365	0.157754	0.0022597	0.131628	0.0127928	0.133826	0.00162394
	60.0059		0.0308739	0.00170411	0.0594429	0.0029256	0.0852157	0.00567605	0.113853	0.00227141	0.159258	0.00285946	0.135658	0.0140849	0.13709	0.00173717
	65.0064		0.0317202	0.00187548	0.0593709	0.00478743	0.0873413	0.00478339	0.114802	0.00308014	0.16093	0.00495811	0.136029	0.00820304	0.139583	0.00262418
	70.0068		0.0298455	0.00216563	0.0599183	0.00332632	0.087539	0.00508477	0.116858	0.00253228	0.162879	0.00424455	0.136991	0.00479125	0.140329	0.00295298
	75.0073		0.0321573	0.0037053	0.0624199	0.00535619	0.0882464	0.00567597	0.118457	0.00426981	0.166433	0.00389372	0.13854	0.0109602	0.144815	0.00488848
	80.0078		0.0326081	0.0017521	0.0608341	0.00284622	0.0919029	0.00746105	0.118823	0.00155319	0.17067	0.00223976	0.140547	0.00985269	0.144866	0.00201948
	85.0083		0.0336748	0.00353954	0.0640331	0.00842642	0.0922055	0.00559372	0.122092	0.00264195	0.171435	0.00101712	0.142823	0.00467392	0.149234	0.00467425
	90.0087		0.033147	0.00387614	0.0631442	0.00282833	0.0924821	0.00524931	0.124381	0.00267712	0.17237	0.00742697	0.145735	0.0090869	0.149959	0.00486537
	95.0092		0.0327986	0.00277801	0.0641462	0.00340419	0.0941035	0.00672853	0.124077	0.00226827	0.176624	0.00430188	0.148282	0.00926857	0.155663	0.00951786
	%RH	N2
	0		0.0141268	0.000101288	0.0141006	0.000187814	0.0142748	0.000179466	0.0142925	7.32167e-05	0.0143318	0.000111388	0.0141198	0.000116926	0.0142787	9.65863e-05
	0.00318445		0.0141067	0.000143643	0.014244	0.000197606	0.0142888	0.000223066	0.0142256	4.99002e-05	0.0142326	0.000116869	0.0143443	0.000167901	0.0142376	0.000147488
	0.0318442		0.014276	0.00010811	0.0142184	0.000200713	0.0142169	0.000140124	0.0142589	0.000110349	0.0142196	0.000103822	0.0142502	0.000265077	0.0142985	0.000101474
	0.159215		0.0141957	0.000174534	0.0142513	0.000161432	0.0142099	0.000235641	0.0142412	5.81005e-05	0.0142785	0.000102832	0.0142884	0.000265739	0.0142833	0.000139594
	0.318414		0.0141923	0.000175951	0.0142066	0.000157876	0.0142103	0.000131184	0.0142248	6.77256e-05	0.0142418	6.12878e-05	0.014077	0.000116345	0.0142841	0.000133833
	0.636764		0.014113	0.000131406	0.0141539	0.000117946	0.0142156	0.000182391	0.0142382	3.70922e-05	0.0142276	8.43777e-05	0.0141888	0.000245058	0.0142655	6.09502e-05
	0.95505		0.0142406	0.000151852	0.0143006	8.23209e-05	0.0142072	0.000238345	0.0142856	6.5817e-05	0.0142633	3.60432e-05	0.0142446	0.000158836	0.0142864	0.000169534
	1.27327		0.0142899	8.66601e-05	0.0142032	0.000284084	0.0142338	0.000142508	0.0142436	0.000113001	0.0142792	0.000119661	0.0142254	0.000127615	0.0142786	7.13061e-05
	1.59143		0.0142406	0.000214834	0.0142422	7.98733e-05	0.0142986	8.83499e-05	0.0142569	5.67844e-05	0.0142351	0.000105289	0.0143088	0.000213128	0.0142309	8.56443e-05
	3.18127		0.0140308	0.000181663	0.014185	0.000196517	0.0141552	0.000229459	0.0142544	5.56467e-05	0.0142508	4.04732e-05	0.0142005	0.000213336	0.0142793	9.70036e-05
	3.81676		0.0141379	0.000184747	0.0142757	0.00019126	0.0141274	0.000167649	0.0142125	6.99989e-05	0.0142415	8.7514e-05	0.0142689	0.000290913	0.0142644	6.65409e-05
	5.0005		0.0141315	0.00023052	0.0141371	0.000330663	0.0142222	0.000163888	0.0142544	9.66182e-05	0.0142357	9.22319e-05	0.0141975	0.000117639	0.0142495	0.000118096
	10.001		0.014176	0.000137852	0.0142173	0.000152624	0.0141499	0.000135539	0.0141842	9.79337e-05	0.0141756	0.000124598	0.0141054	0.000172415	0.0142093	4.95302e-05
	15.0015		0.014136	9.72951e-05	0.0141124	0.00020274	0.0141138	0.000184314	0.0141747	6.59942e-05	0.0141565	7.4059e-05	0.0141432	0.000190385	0.0141739	7.70119e-05
	20.002		0.0141026	0.000146083	0.0140925	0.000184988	0.014103	0.000257019	0.0141369	9.13454e-05	0.0140992	0.000119816	0.0140501	0.000211095	0.0141357	9.78748e-05
	25.0025		0.0141795	0.000328083	0.0140436	0.000185019	0.0140684	0.000112772	0.0140968	8.46777e-05	0.0140838	2.95657e-05	0.0140526	0.000246623	0.0141045	5.04229e-05
	30.003		0.0140393	0.00010112	0.014083	0.000233216	0.0139906	0.000218283	0.0140956	0.000154985	0.0140478	5.92674e-05	0.0140415	0.000417463	0.0141013	9.00981e-05
	35.0035		0.0140775	0.0002616	0.0140301	0.000244314	0.0140717	0.000293761	0.0140332	9.76229e-05	0.0139981	0.000110873	0.0139636	0.000168728	0.0140693	6.9545e-05
	40.004		0.0139648	0.000241611	0.0139844	0.000169429	0.014016	0.000311975	0.0140029	0.000149962	0.0139648	0.00012629	0.0140534	0.000255762	0.0140174	7.84429e-05
	45.0044		0.0139159	0.000148854	0.0139818	0.000244186	0.0139626	0.000151491	0.0139495	8.84666e-05	0.0139643	0.000101451	0.0139476	0.000109865	0.0139782	6.52456e-05
	50.0049		0.0139765	0.000191036	0.0139367	0.000166114	0.0140215	0.000224571	0.0139537	6.19205e-05	0.0139085	0.000115697	0.0139539	0.000199511	0.0139948	0.00011493
	55.0054		0.0139167	0.000185154	0.0139035	0.00019269	0.0138588	0.000191119	0.0139257	7.89009e-05	0.0138603	0.000100401	0.0138941	0.00017215	0.0139418	3.91918e-05
	60.0059		0.0138507	0.000167846	0.0139159	0.000275838	0.013916	0.000243406	0.0138834	0.00010009	0.0139003	6.707e-05	0.0139054	0.00021831	0.0139388	8.67146e-05
	65.0064		0.0139152	0.000224401	0.0138409	0.000270271	0.0138529	0.000236622	0.0138893	0.000105553	0.0138695	4.26149e-05	0.0138212	0.000213056	0.0138453	4.58225e-05
	70.0068		0.0138729	0.00015988	0.0138173	0.000149112	0.0138215	0.000432362	0.0138408	3.50105e-05	0.0138187	8.07932e-05	0.0138113	0.000163385	0.0138526	9.62736e-05
	75.0073		0.0138236	0.000235965	0.0138594	0.000220274	0.0138565	9.06154e-05	0.0137768	6.74881e-05	0.013785	9.46289e-05	0.0138177	0.000156309	0.0138036	7.66826e-05
	80.0078		0.0137968	0.000191669	0.0138697	0.000175753	0.0138068	0.00020288	0.0137913	0.000166236	0.0137736	0.000102926	0.0137686	0.000157465	0.0138121	7.7285e-05
	85.0083		0.0138199	6.91813e-05	0.0137615	0.000145487	0.0137379	0.000193569	0.0137525	0.000104502	0.0137607	8.41518e-05	0.0136703	0.00016951	0.0137504	0.000103046
	90.0087		0.0137628	0.000182681	0.0137019	0.00022835	0.0137127	0.000213245	0.0137538	8.41036e-05	0.0137412	8.10036e-05	0.0137121	9.90531e-05	0.0137519	0.00010899
	95.0092		0.0137393	0.00015654	0.01372	0.000318711	0.0137406	0.000221929	0.0137107	6.50214e-05	0.0136669	0.000150726	0.0135944	5.40338e-05	0.0137253	7.63956e-05
	%RH	O2
	0		0.00389003	0.00014629	0.00392318	5.39414e-05	0.00393488	0.000114896	0.00396032	3.35517e-05	0.00392619	2.5266e-05	0.00392008	0.000112238	0.00391773	1.44589e-05
	0.00318445		0.00393848	0.000129148	0.00393089	6.76198e-05	0.00394886	5.03974e-05	0.00393486	6.8117e-06	0.00392515	5.0051e-05	0.00397071	4.91048e-05	0.00392116	6.82694e-05
	0.0318442		0.00394629	4.86435e-05	0.00395967	0.000153108	0.00394886	2.5839e-05	0.00392847	2.3196e-05	0.00391489	2.04609e-05	0.00394973	7.60676e-05	0.00391627	4.24945e-05
	0.159215		0.003964	0.000108106	0.003892	9.53994e-05	0.00391756	0.000117488	0.00393092	3.27473e-05	0.00391399	2.8426e-05	0.0039371	8.36008e-05	0.00393349	6.4986e-06
	0.318414		0.00394765	8.3293e-05	0.0039237	7.58484e-05	0.00394594	0.00010718	0.00392818	1.86594e-05	0.00391015	1.049e-05	0.00392185	6.83334e-05	0.00393535	3.11375e-05
	0.636764		0.00393681	0.000163785	0.00388512	6.9422e-05	0.00390525	8.87236e-05	0.00392979	1.84953e-05	0.00392734	3.73275e-05	0.00390202	9.54143e-05	0.00393702	4.91327e-05
	0.95505		0.00394952	7.8899e-05	0.00390702	4.60296e-05	0.00393352	8.43648e-05	0.00393559	3.61807e-05	0.00391859	6.40866e-05	0.00391632	9.1742e-05	0.00391809	4.25485e-05
	1.27327		0.00391764	8.17921e-05	0.0039334	0.000151907	0.0039064	6.4607e-05	0.00393225	1.41652e-05	0.00391508	1.47787e-05	0.00389377	9.59166e-05	0.0039418	6.31242e-05
	1.59143		0.00399245	3.80016e-05	0.00394789	0.000109803	0.0039643	4.90897e-05	0.00391874	1.81726e-05	0.0039184	7.32348e-05	0.00390839	0.00010598	0.00392425	4.0676e-05
	3.18127		0.00392358	2.23623e-05	0.0039334	8.34186e-05	0.00390358	0.000109613	0.00392509	6.16689e-05	0.00390369	1.50677e-05	0.00392509	8.03945e-05	0.00392899	3.37611e-05
	3.81676		0.00393587	0.000102128	0.00398886	0.000143447	0.00391975	7.7293e-05	0.00392841	2.70899e-05	0.00389753	3.90377e-05	0.00392937	0.000126261	0.00392454	3.26855e-05
	5.0005		0.00393316	9.38089e-05	0.00389607	9.27069e-05	0.0039161	0.000132617	0.00393296	2.87369e-05	0.00389711	1.83989e-05	0.00391298	5.04726e-05	0.00391821	3.75031e-05
	10.001		0.00395629	0.000107611	0.00387511	8.76438e-05	0.00390191	0.000123988	0.00393073	2.77176e-05	0.00390513	4.0592e-05	0.00389586	7.05355e-05	0.00390967	4.09741e-05
	15.0015		0.00387825	4.64965e-05	0.00390514	5.25092e-05	0.00389419	9.07076e-05	0.00389747	4.50738e-05	0.00387945	2.43768e-05	0.00389795	3.0247e-05	0.00390975	4.77148e-05
	20.002		0.00390253	7.17553e-05	0.00389847	0.000135889	0.00390754	8.80097e-05	0.00389531	4.04373e-05	0.0038781	3.32095e-05	0.00385566	0.000117478	0.00388081	5.7315e-05
	25.0025		0.00391639	7.81863e-05	0.00390587	9.80588e-05	0.00386769	6.79566e-05	0.00387968	3.06209e-05	0.00387954	3.99093e-05	0.00389805	0.000132706	0.00388253	3.20813e-05
	30.003		0.00393098	7.3008e-05	0.00389982	5.04543e-05	0.00385225	8.93866e-05	0.00388761	4.59096e-05	0.00386955	3.79573e-05	0.00382674	9.4863e-05	0.003887	4.01983e-05
	35.0035		0.003934	8.29901e-05	0.00389013	6.75452e-05	0.00390118	7.51526e-05	0.0038708	4.04459e-05	0.00385538	6.08544e-05	0.00386788	7.52116e-05	0.00387413	5.24141e-05
	40.004		0.00389117	8.834e-05	0.00388325	0.000132566	0.00385893	0.000103502	0.00386057	4.17476e-05	0.0038478	4.96368e-05	0.00386015	7.09945e-05	0.00385752	4.39662e-05
	45.0044		0.0038918	0.000105096	0.00389544	4.21797e-05	0.00389085	8.76602e-05	0.00384305	4.49735e-05	0.0038496	4.84532e-05	0.0038351	5.93362e-05	0.00384151	3.57435e-05
	50.0049		0.00385919	5.96302e-05	0.0038478	5.77315e-05	0.00383983	5.99174e-05	0.00387193	3.45948e-05	0.00383612	3.49733e-05	0.00381662	4.83352e-05	0.00385313	2.13217e-05
	55.0054		0.00389701	5.47803e-05	0.00388815	0.00012273	0.00381719	0.000176947	0.00384151	3.76038e-05	0.00382423	3.78516e-05	0.0038162	0.00011428	0.00383622	2.79236e-05
	60.0059		0.00384408	6.40404e-05	0.00385718	6.45146e-05	0.0038703	0.000110113	0.00384082	2.12255e-05	0.00381512	7.55867e-05	0.00385493	6.3883e-05	0.00383108	2.46833e-05
	65.0064		0.00386711	8.68318e-05	0.00385249	0.000105728	0.00382669	9.15809e-05	0.00382261	4.7652e-05	0.00380273	2.45039e-05	0.00382685	2.75352e-05	0.00381656	3.2367e-05
	70.0068		0.00383595	7.88109e-05	0.0038431	0.000117592	0.00380979	0.000131652	0.00381536	4.18298e-05	0.00380033	3.2359e-05	0.00378905	0.000122729	0.00381245	2.54862e-05
	75.0073		0.00383272	9.6992e-05	0.00382538	7.44727e-05	0.00380613	0.000116797	0.00378958	4.10362e-05	0.00380831	3.8515e-05	0.00381985	4.76996e-05	0.0037959	2.54158e-05
	80.0078		0.00385075	6.50502e-05	0.00383466	0.000135615	0.00381469	4.84469e-05	0.00380233	1.9302e-05	0.00378278	3.64283e-05	0.0037878	5.728e-05	0.00380047	3.11355e-05
	85.0083		0.00385929	7.02632e-05	0.00382715	7.99756e-05	0.00378975	6.32338e-05	0.00379221	2.95631e-05	0.0037959	4.07103e-05	0.00379501	8.55636e-05	0.00379859	2.94624e-05
	90.0087		0.00382043	6.01132e-05	0.00377387	9.80251e-05	0.0038222	4.60245e-05	0.00379242	4.68546e-05	0.0037725	6.39859e-05	0.00377339	6.99931e-05	0.00377864	5.7103e-05
	95.0092		0.00380647	6.63784e-05	0.00381214	6.51438e-05	0.00378871	6.45119e-05	0.00378596	3.45661e-05	0.00377436	3.46136e-05	0.00378383	6.02448e-05	0.00377659	1.95982e-05
	%RH	argon
	0		0.000186505	1.02723e-05	0.000190591	2.17965e-05	0.000186963	2.416e-05	0.000183956	1.3281e-05	0.000183641	8.311e-06	0.000178945	3.63126e-05	0.000185521	5.3244e-06
	0.00318445		0.000187651	1.58345e-05	0.000190904	7.3842e-06	0.000186232	2.05722e-05	0.000183309	9.6624e-06	0.000182261	1.15722e-05	0.000187401	1.48969e-05	0.000184769	7.7163e-06
	0.0318442		0.000181399	1.6741e-05	0.000186525	2.24917e-05	0.000183416	8.2045e-06	0.000183559	6.0451e-06	0.000182721	8.6099e-06	0.000181763	1.12715e-05	0.000185061	8.6912e-06
	0.159215		0.000182441	2.18099e-05	0.00018517	2.72474e-05	0.000181955	1.25961e-05	0.000183476	5.6502e-06	0.000185521	9.6652e-06	0.000192726	1.39664e-05	0.000180882	4.8113e-06
	0.318414		0.000184212	1.55327e-05	0.000179331	1.55347e-05	0.000177886	1.1486e-05	0.00018406	1.9454e-06	0.00018596	1.16215e-05	0.000177379	2.47536e-05	0.000183348	7.5579e-06
	0.636764		0.000181816	1.09872e-05	0.000187463	1.28982e-05	0.000185294	1.54806e-05	0.000184812	5.9315e-06	0.000180088	9.6036e-06	0.000178632	1.27079e-05	0.00018947	6.6791e-06
	0.95505		0.000187547	1.18615e-05	0.000192989	1.39634e-05	0.000184563	1.71104e-05	0.000185835	5.5825e-06	0.000180172	1.27894e-05	0.00018761	2.75716e-05	0.000185354	7.2758e-06
	1.27327		0.000182128	2.46089e-05	0.000187881	1.61603e-05	0.00018905	2.16106e-05	0.000184854	1.11452e-05	0.0001813	8.1831e-06	0.000178632	1.72992e-05	0.000184476	8.031e-06
	1.59143		0.000187547	1.33594e-05	0.000180582	2.38631e-05	0.000189154	1.26168e-05	0.0001869	5.955e-06	0.000182972	2.1414e-06	0.000182494	9.5366e-06	0.000183306	4.1297e-06
	3.18127		0.000186817	1.21258e-05	0.000183918	1.1895e-05	0.000186232	4.7583e-06	0.000183121	6.876e-06	0.000181426	8.6621e-06	0.000186357	2.31292e-05	0.000184058	1.11392e-05
	3.81676		0.000183379	1.71459e-05	0.000182772	1.8162e-05	0.000187589	1.19614e-05	0.000184729	6.7809e-06	0.000182366	6.7752e-06	0.000187088	1.08417e-05	0.00018713	7.2986e-06
	5.0005		0.000182962	1.31034e-05	0.000175369	1.38414e-05	0.000183103	1.79257e-05	0.000180114	5.2913e-06	0.000181823	9.2481e-06	0.000187297	9.3706e-06	0.000185563	3.5812e-06
	10.001		0.000186088	1.29702e-05	0.000195075	1.90363e-05	0.000175382	2.98134e-05	0.000182557	1.7991e-06	0.00018176	3.4773e-06	0.000183747	1.94983e-05	0.000188467	9.4252e-06
	15.0015		0.00018515	2.79469e-05	0.000186942	3.19907e-05	0.000183624	1.30311e-05	0.000186963	5.4632e-06	0.000182805	6.8811e-06	0.000177274	2.60176e-05	0.000183975	3.541e-06
	20.002		0.000181608	6.5434e-06	0.000185482	1.72761e-05	0.000171522	1.87496e-05	0.000186169	2.9334e-06	0.000181885	7.4882e-06	0.000178736	1.97714e-05	0.000187736	1.9645e-06
	25.0025		0.00018515	1.15009e-05	0.000186734	1.35364e-05	0.000186232	8.7539e-06	0.000184248	8.3117e-06	0.00018293	7.7032e-06	0.000178632	8.284e-06	0.000185208	6.8912e-06
	30.003		0.000182128	1.67824e-05	0.000186734	2.42678e-05	0.000181433	1.41738e-05	0.000182432	5.5959e-06	0.000182951	1.27263e-05	0.000184582	2.3895e-05	0.000184978	2.7166e-06
	35.0035		0.000177127	2.20337e-05	0.000180791	1.05176e-05	0.000188632	1.84122e-05	0.000182265	7.3199e-06	0.000179211	8.6681e-06	0.000186357	1.66389e-05	0.000185291	1.0193e-05
	40.004		0.000190256	1.64927e-05	0.000176099	1.43473e-05	0.000176738	1.65016e-05	0.000181116	5.283e-06	0.000182387	1.21973e-05	0.000168609	1.32389e-05	0.000180527	8.087e-06
	45.0044		0.00017869	2.08697e-05	0.000184231	1.07061e-05	0.000182268	1.22846e-05	0.000181367	5.5722e-06	0.00017873	4.5306e-06	0.000175395	1.78157e-05	0.000182178	5.4444e-06
	50.0049		0.000183379	9.6174e-06	0.000183502	1.40193e-05	0.00017966	1.73405e-05	0.0001812	1.08575e-05	0.000178626	3.7689e-06	0.000180302	2.37394e-05	0.00018247	7.647e-06
	55.0054		0.000177544	1.49166e-05	0.000169843	1.79912e-05	0.000179034	1.15879e-05	0.000180114	9.1925e-06	0.000177686	9.2968e-06	0.00017978	2.54072e-05	0.000182575	6.4273e-06
	60.0059		0.000184212	2.09694e-05	0.000184023	2.68422e-05	0.000187797	1.26582e-05	0.000176063	5.3555e-06	0.000178312	7.3854e-06	0.000182181	1.05853e-05	0.000175575	9.1798e-06
	65.0064		0.000184421	1.2133e-05	0.00018444	1.43625e-05	0.00018279	1.35968e-05	0.000182891	5.5061e-06	0.000177351	7.5897e-06	0.000186462	9.324e-06	0.000181718	9.8488e-06
	70.0068		0.000188901	1.00932e-05	0.000187463	1.44259e-05	0.00018352	1.71486e-05	0.000180991	8.9932e-06	0.000178124	8.9744e-06	0.00019022	1.45505e-05	0.000184079	3.6166e-06
	75.0073		0.000177961	1.43408e-05	0.000182563	2.35125e-05	0.000187172	1.78453e-05	0.000180344	7.9965e-06	0.00017405	5.9452e-06	0.000177274	1.75146e-05	0.000178856	4.4047e-06
	80.0078		0.000177648	2.84123e-05	0.000188089	2.4384e-05	0.000173191	1.43357e-05	0.000181095	3.8037e-06	0.000175847	8.9299e-06	0.00017717	1.99907e-05	0.000180715	8.8424e-06
	85.0083		0.000177961	7.9787e-06	0.000181312	1.17664e-05	0.000174234	1.4755e-06	0.00017717	8.5859e-06	0.000177101	4.9009e-06	0.000181763	1.47558e-05	0.000177351	5.0087e-06
	90.0087		0.000183483	2.09362e-05	0.000184023	1.82861e-05	0.000173713	1.18406e-05	0.000178652	6.3021e-06	0.0001785	1.05334e-05	0.000169966	1.15618e-05	0.000178876	1.10178e-05
	95.0092		0.000182024	1.20899e-05	0.00017735	1.15425e-05	0.000180599	8.5119e-06	0.00017884	3.8997e-06	0.000178208	1.0834e-05	0.00017362	1.17488e-05	0.000175178	3.7058e-06
		313k
		MOL/KG
	%RH	tip3p
	0		0	0	0	0	0	0	0	0	0	0	0	0	0	0
	0.00136563		0.0208388	5.104e-07	0.0417054	1.6152e-06	0.0625998	1.2167e-06	0.0835219	5.115e-07	0.0964244	0.0110976	0.0761033	0.0142653	0.104325	0.000591206
	0.0136562		0.0208416	3.2949e-06	0.0417075	1.9782e-06	0.0626035	5.1705e-06	0.0835293	3.9228e-06	0.103597	0.00151263	0.083543	1.98462e-05	0.104487	1.97345e-05
	0.0682781		0.020849	1.28694e-05	0.0417389	1.97648e-05	0.0626362	3.46156e-05	0.0835765	1.45189e-05	0.10421	0.00111523	0.0836892	0.000130739	0.104527	2.0619e-05
	0.136549		0.0208707	4.62568e-05	0.0417546	3.79927e-05	0.0626826	9.69625e-05	0.0836172	2.90808e-05	0.104762	9.09211e-05	0.0839147	0.000253279	0.104556	4.47483e-05
	0.273071		0.0208815	4.30132e-05	0.0417823	2.75505e-05	0.0627161	0.000100952	0.083711	1.53124e-05	0.105072	0.000314785	0.0843529	0.000278369	0.104687	6.07585e-05
	0.409566		0.0209286	5.58184e-05	0.0418651	0.000107835	0.0628166	0.000226816	0.0837914	8.67846e-05	0.10536	0.000189584	0.0843596	0.000709533	0.104813	0.000119675
	0.546033		0.0209504	0.000107889	0.0418969	0.000135373	0.0629468	0.00012396	0.0839261	0.000133721	0.105745	0.000376189	0.0848825	0.00103243	0.104859	0.000111684
	0.682473		0.0209927	0.000111623	0.0419423	0.000142336	0.0629887	0.000279767	0.0839849	0.000114573	0.106242	0.00054488	0.0852258	0.000994095	0.104949	6.94505e-05
	1.36426		0.0212206	0.00030296	0.0422138	0.000535097	0.063108	0.000244884	0.0844828	0.000158637	0.107323	0.000512571	0.0857374	0.0013994	0.105577	0.000339108
	1.63679		0.0212674	0.000287481	0.0423517	0.000579863	0.0635945	0.000456978	0.084704	0.000156414	0.108139	0.000275278	0.0868903	0.00140102	0.10565	0.000140986
	5.0005		0.0218484	0.000435771	0.0436833	0.000756916	0.0651567	0.000504426	0.0868005	0.000424748	0.11507	0.00233349	0.091286	0.00273857	0.108256	0.000706907
	10.001		0.0230616	0.000347454	0.0459476	0.00119325	0.0673906	0.000772368	0.0903218	0.00089055	0.122991	0.00262279	0.10027	0.00121247	0.111681	0.00076396
	15.0015		0.0234671	0.00146391	0.0470446	0.00103118	0.070405	0.00178492	0.0933505	0.00106431	0.128761	0.00371295	0.105068	0.00522076	0.11513	0.000741734
	20.002		0.0246296	0.00120505	0.0485359	0.00209108	0.0730809	0.00357008	0.0958893	0.000761993	0.132783	0.00293838	0.111129	0.00756183	0.117692	0.00137297
	25.0025		0.0264369	0.00163098	0.0501166	0.00231126	0.0739021	0.00301475	0.0986412	0.00188654	0.138257	0.00268878	0.116465	0.00551984	0.120965	0.00253062
	30.0029		0.0266209	0.00188052	0.0511173	0.00266544	0.0757472	0.00357684	0.10158	0.00143745	0.141468	0.00323794	0.118096	0.00512278	0.124425	0.00174745
	35.0034		0.0275933	0.000823973	0.0529874	0.00224392	0.0789811	0.00215008	0.105093	0.00195259	0.145741	0.00327748	0.119894	0.00419923	0.128041	0.00158741
	40.0039		0.0278369	0.00112767	0.0543157	0.00226222	0.0806297	0.00620068	0.107414	0.00266538	0.14998	0.00250041	0.123019	0.00416155	0.129698	0.00101505
	45.0044		0.0292708	0.00264225	0.057235	0.00321382	0.0820285	0.00459886	0.108559	0.000949794	0.151945	0.00328929	0.127417	0.00527681	0.133308	0.00352363
	50.0048		0.0296477	0.00157132	0.0568766	0.0020498	0.0843598	0.00351897	0.111607	0.002508	0.156357	0.00477023	0.130012	0.0115612	0.135412	0.00212681
	55.0053		0.0300557	0.00415285	0.0587043	0.00178697	0.0884688	0.00976464	0.114266	0.00235728	0.159392	0.00173674	0.131577	0.00527625	0.139686	0.00155818
	60.0057		0.0301235	0.00135882	0.0603964	0.00151352	0.0883021	0.00689937	0.115204	0.00206819	0.16267	0.00389924	0.138009	0.0100919	0.141271	0.00192819
	65.0062		0.0318691	0.0040278	0.0599236	0.00336211	0.0902182	0.00690432	0.117934	0.00161637	0.166876	0.00200597	0.136147	0.00698392	0.144	0.00463937
	70.0066		0.0315424	0.00285024	0.0635669	0.00422017	0.0891674	0.00464451	0.120183	0.000915608	0.166086	0.00205627	0.141063	0.0112994	0.145565	0.00275769
	75.0071		0.0325362	0.00359353	0.0632107	0.00552433	0.0947031	0.00784605	0.120474	0.00281087	0.170517	0.0050889	0.139816	0.00746943	0.149183	0.00499243
	80.0075		0.0327259	0.00373104	0.0623765	0.00296546	0.0970311	0.00598434	0.124834	0.00318266	0.173596	0.00381274	0.142405	0.00542173	0.152098	0.00472552
	85.008		0.0342419	0.00165738	0.0649422	0.00283833	0.0980094	0.00875913	0.125671	0.00262984	0.175633	0.00446018	0.147665	0.0103839	0.153479	0.000800337
	90.0084		0.0348802	0.00323988	0.0654489	0.00615503	0.0980758	0.00513856	0.130116	0.00546379	0.178594	0.00367076	0.145792	0.00619722	0.155916	0.00337393
	95.0088		0.0373953	0.00454146	0.0673206	0.00444884	0.0974289	0.00568265	0.130342	0.00424735	0.181367	0.00195987	0.147149	0.0054813	0.160401	0.00294627
	%RH	N2
	0		0.012601	0.000125515	0.01257	0.000133816	0.012532	0.000190041	0.0125625	0.000105277	0.0126196	0.000137877	0.0125631	5.64751e-05	0.0126172	4.75159e-05
	0.00136563		0.01261	0.000138325	0.012485	0.000245595	0.0127101	0.000127895	0.0126106	0.000109968	0.012614	9.97207e-05	0.0125926	0.000250113	0.0126124	7.77305e-05
	0.0136562		0.0125428	0.000115828	0.0125717	0.000236875	0.0126637	0.000147948	0.0125709	3.69016e-05	0.0125762	9.62197e-05	0.0126028	0.000189921	0.0126173	6.78606e-05
	0.0682781		0.0125776	0.000175926	0.0125932	0.000152707	0.0126836	0.000225294	0.0125765	3.38552e-05	0.0125816	0.00018237	0.0125434	0.000127809	0.0126234	9.10205e-05
	0.136549		0.0125632	0.00011956	0.0125984	0.000217874	0.0125785	0.000180866	0.0125506	2.63422e-05	0.0126447	0.000139424	0.0125918	0.00023257	0.0125814	7.9008e-05
	0.273071		0.0125349	0.000133674	0.0125726	0.000128139	0.0125283	0.000136504	0.0126084	4.17535e-05	0.0126516	0.000115051	0.0125729	3.53588e-05	0.0126286	0.000106872
	0.409566		0.0126052	8.98935e-05	0.0125768	0.000259605	0.0126441	0.000187688	0.0126003	3.62977e-05	0.0126487	0.000125263	0.0125726	0.000220347	0.0126249	9.10618e-05
	0.546033		0.0124781	0.000104332	0.0125932	0.000168737	0.0126112	0.000233899	0.0126213	6.10265e-05	0.01258	7.5636e-05	0.0126681	0.000209669	0.0126032	5.7754e-05
	0.682473		0.0125025	0.000194398	0.012573	0.000137135	0.0125259	0.000152434	0.0126504	7.96271e-05	0.0126477	0.000103258	0.0125462	0.000302563	0.0125984	8.52398e-05
	1.36426		0.0125368	0.000249752	0.012604	0.000228885	0.012535	4.7146e-05	0.0125867	4.09576e-05	0.0126175	7.74917e-05	0.0126087	0.000151476	0.0125886	9.88808e-05
	1.63679		0.0125359	0.000286435	0.0125751	0.000160797	0.0125974	7.39289e-05	0.0125828	5.65008e-05	0.0125739	3.3226e-05	0.0126409	0.000223862	0.0125965	0.000101288
	5.0005		0.0125789	0.000209856	0.012482	7.36112e-05	0.012647	0.000249254	0.0125962	4.98308e-05	0.0125608	9.23547e-05	0.0125346	0.000190915	0.0125561	7.29255e-05
	10.001		0.0124795	0.000154844	0.012506	0.00021508	0.0124895	0.00012824	0.012469	5.03044e-05	0.0125514	8.36844e-05	0.0124939	0.000194397	0.0125065	5.02229e-05
	15.0015		0.0124	0.000178437	0.012456	0.000246338	0.0123562	0.000210755	0.0124513	8.06193e-05	0.0124604	8.37075e-05	0.0125043	0.000159949	0.0124591	6.8823e-05
	20.002		0.0123358	0.00018039	0.0124156	0.000197153	0.0124534	4.5614e-05	0.012414	0.000134868	0.0123634	6.63325e-05	0.0124522	0.000170363	0.0124166	9.50265e-05
	25.0025		0.0124063	0.000151774	0.0123386	0.000218253	0.0123353	8.48506e-05	0.0123546	3.52715e-05	0.012342	5.43401e-05	0.0123372	0.00022844	0.0123433	6.70429e-05
	30.0029		0.0123466	0.000208202	0.012332	0.000189344	0.0123712	0.000241151	0.012302	5.79888e-05	0.0122547	7.83986e-05	0.01224	8.52328e-05	0.01229	5.47115e-05
	35.0034		0.0122436	9.18536e-05	0.0121898	0.000172472	0.0122575	0.000274746	0.01223	6.8868e-05	0.0121961	6.27e-05	0.0122025	0.000177955	0.0122323	0.000116348
	40.0039		0.0121231	0.0001773	0.0121705	0.000145503	0.012134	0.000171738	0.0121766	4.07575e-05	0.0121618	8.70749e-05	0.0121816	0.000215735	0.0121644	9.55207e-05
	45.0044		0.0121821	0.000232219	0.0121118	0.000130448	0.0121239	0.000234539	0.0121489	7.43107e-05	0.0121345	7.769e-05	0.0121113	0.000152885	0.0121354	8.53477e-05
	50.0048		0.0120893	0.000126245	0.0120622	8.10176e-05	0.0121258	0.000166176	0.0120941	5.27004e-05	0.0120929	4.11343e-05	0.0120256	0.000262276	0.0121065	7.08028e-05
	55.0053		0.0119924	0.000155016	0.0121052	0.000128144	0.0120475	6.23259e-05	0.0120202	7.90762e-05	0.0120283	5.83493e-05	0.0120051	0.000200642	0.0120487	8.9712e-05
	60.0057		0.0119879	0.000181397	0.0120258	6.79502e-05	0.0120045	0.000117427	0.0119956	7.98954e-05	0.0119778	9.69593e-05	0.0119785	0.000157197	0.0119843	7.77989e-05
	65.0062		0.0119703	0.000160418	0.0119956	0.000248452	0.0119504	0.000174643	0.011918	8.76668e-05	0.011885	7.27411e-05	0.0118337	0.000172298	0.0119611	0.000100591
	70.0066		0.0118228	0.000165287	0.0119109	0.000192572	0.0118485	0.000217992	0.0118702	3.527e-05	0.0118889	4.16861e-05	0.0118691	0.000133278	0.01187	7.46492e-05
	75.0071		0.0117971	0.00017762	0.0117775	0.000196598	0.0118209	0.000156586	0.0118376	5.84688e-05	0.0118319	7.59716e-05	0.0117164	0.000184874	0.0118391	3.67812e-05
	80.0075		0.0117916	0.000181648	0.0118488	0.000243702	0.0117804	0.000156982	0.0117681	8.31473e-05	0.01176	5.97437e-05	0.0117859	0.000146417	0.0117965	4.93213e-05
	85.008		0.0117318	0.000131297	0.0117056	0.000265844	0.011728	0.000109349	0.0117276	6.37177e-05	0.0116833	4.72008e-05	0.0117329	8.54836e-05	0.0117388	0.000102586
	90.0084		0.0117501	0.000230599	0.011723	0.000194498	0.0117238	0.000182378	0.0116734	7.95621e-05	0.0116396	5.11365e-05	0.0116237	0.000171603	0.0116765	0.000110824
	95.0088		0.0117188	0.000216329	0.0116515	0.000223693	0.0116852	0.000157688	0.0116366	8.60029e-05	0.0115816	9.73161e-05	0.0116336	0.000168814	0.0116505	5.99305e-05
	%RH	O2
	0		0.00348816	3.56856e-05	0.00346776	4.97365e-05	0.00344723	0.000137531	0.00346691	6.05848e-05	0.0034656	3.94496e-05	0.00346938	0.000148825	0.0034763	2.94069e-05
	0.00136563		0.00345878	0.000119322	0.00348986	6.06501e-05	0.0034609	4.21201e-05	0.00345944	5.87859e-05	0.00346489	3.46364e-05	0.0034628	5.96996e-05	0.00347435	3.61868e-05
	0.0136562		0.00344742	5.97982e-05	0.00348476	7.56044e-05	0.00350889	8.10132e-05	0.00348119	1.84578e-05	0.00345442	2.32544e-05	0.00345904	9.66641e-05	0.00348344	3.14449e-05
	0.0682781		0.00350545	5.81144e-05	0.00348361	3.57095e-05	0.00345923	6.1792e-05	0.00346566	3.75827e-05	0.00345657	1.49171e-05	0.00346186	4.07001e-05	0.00348098	4.19504e-05
	0.136549		0.00346107	4.087e-05	0.00345066	0.00012692	0.00351077	0.000136641	0.00345497	4.22397e-05	0.00345484	3.72043e-05	0.0034723	2.50947e-05	0.00345812	3.20479e-05
	0.273071		0.00350556	0.000104032	0.00345327	5.62181e-05	0.00346372	0.000112022	0.00346374	1.76579e-05	0.00344602	2.15293e-05	0.00348232	4.89732e-05	0.0034867	2.71622e-05
	0.409566		0.00349035	0.000159478	0.00345598	0.000100727	0.00346466	0.000103957	0.00344518	4.08847e-05	0.00345344	3.63161e-05	0.00346551	6.01354e-05	0.00346938	3.1422e-05
	0.546033		0.00350191	8.31323e-05	0.00346171	5.36423e-05	0.00345391	5.31131e-05	0.00347105	2.44709e-05	0.00345175	3.71577e-05	0.00346092	7.66056e-05	0.00346178	1.79029e-05
	0.682473		0.00347503	0.000137385	0.00346317	0.000140592	0.00350649	6.5881e-05	0.00346601	2.10287e-05	0.00345442	1.54163e-05	0.00347616	9.34857e-05	0.00347258	1.76354e-05
	1.36426		0.00347451	5.02057e-05	0.0034541	8.1165e-05	0.00345287	4.55394e-05	0.00347044	4.69427e-05	0.0034577	3.3611e-05	0.00345779	6.26306e-05	0.00346522	5.61453e-05
	1.63679		0.00346378	0.000105603	0.00345275	7.11658e-05	0.00344817	3.71398e-05	0.00345017	3.00973e-05	0.00343666	2.62154e-05	0.0034794	4.01783e-05	0.00347542	4.42085e-05
	5.0005		0.00345711	9.7316e-05	0.00348444	3.13689e-05	0.00349648	8.82838e-05	0.00345263	2.477e-05	0.00343117	2.3942e-05	0.00346489	8.0167e-05	0.00346121	3.10652e-05
	10.001		0.00343346	4.99368e-05	0.00346964	6.1871e-05	0.0034369	3.80238e-05	0.0034334	3.52438e-05	0.00343263	4.03065e-05	0.00343722	7.9314e-05	0.00343401	5.91137e-05
	15.0015		0.00340855	5.66501e-05	0.00344555	0.000119855	0.0033911	9.40646e-05	0.00341974	2.65864e-05	0.00341303	1.78505e-05	0.00342574	5.2553e-05	0.00341397	3.29189e-05
	20.002		0.00343783	7.30002e-05	0.00339561	8.6256e-05	0.00341927	0.000117642	0.00339968	1.20598e-05	0.00338445	1.90069e-05	0.00343096	5.78563e-05	0.00341539	3.73798e-05
	25.0025		0.00342033	6.18296e-05	0.00341365	8.28328e-05	0.00336523	5.41401e-05	0.00340962	2.06463e-05	0.00339032	2.17502e-05	0.00338283	3.24258e-05	0.00340143	4.7731e-05
	30.0029		0.00341001	7.73375e-05	0.00339499	6.77996e-05	0.00341426	0.000103075	0.00337199	1.56725e-05	0.00335302	4.03835e-05	0.00338742	8.76811e-05	0.00337926	3.4143e-05
	35.0034		0.00337198	4.76359e-05	0.00340885	6.03533e-05	0.00335688	5.7103e-05	0.0033571	8.5956e-06	0.00334341	1.9432e-05	0.00338241	4.05617e-05	0.00336982	3.23617e-05
	40.0039		0.00338407	5.8148e-05	0.00335568	3.82402e-05	0.0033719	0.000133431	0.00333505	2.72325e-05	0.0033272	3.56067e-05	0.00338627	5.56923e-05	0.00335503	3.77529e-05
	45.0044		0.00339772	6.29206e-05	0.00335954	5.76848e-05	0.00336867	8.76999e-05	0.00333789	3.69205e-05	0.00331226	4.91344e-05	0.00331799	8.6927e-05	0.00334005	3.42248e-05
	50.0048		0.00333635	8.21376e-05	0.00335714	5.85074e-05	0.00333163	0.000119515	0.00331568	1.10231e-05	0.00330565	4.72102e-05	0.0033158	0.000117957	0.0033137	1.99541e-05
	55.0053		0.00333624	9.88128e-05	0.00330063	9.9159e-05	0.00332579	7.99093e-05	0.00331025	3.25823e-05	0.00328946	1.31157e-05	0.00331424	3.01358e-05	0.00331326	3.73663e-05
	60.0057		0.00334396	9.52627e-05	0.00330063	4.58782e-05	0.00331943	0.000130209	0.00330503	2.38656e-05	0.00327847	3.51745e-05	0.00330432	3.67459e-05	0.00330241	2.06968e-05
	65.0062		0.00329801	6.32118e-05	0.00328405	3.41789e-05	0.00331494	0.000116025	0.00328784	1.51916e-05	0.00327256	3.91253e-05	0.00326036	3.26322e-05	0.00329103	3.3817e-05
	70.0066		0.00331332	6.40492e-05	0.00326184	6.52351e-05	0.00331223	8.19032e-05	0.00327458	2.03484e-05	0.0032615	5.04703e-05	0.00333073	0.000106374	0.00325787	1.96338e-05
	75.0071		0.00330363	0.000111225	0.00327811	8.51444e-05	0.00325401	4.31506e-05	0.00325752	2.6696e-05	0.00323881	4.56599e-05	0.00324742	2.72487e-05	0.00324788	3.12823e-05
	80.0075		0.00330165	2.4907e-05	0.00327237	1.32277e-05	0.00326069	0.000105763	0.00324318	3.63941e-05	0.00322648	3.20019e-05	0.0032494	7.54657e-05	0.00324157	7.8374e-06
	85.008		0.00322288	7.29782e-05	0.00325235	9.52466e-05	0.00324139	7.87097e-05	0.00323817	5.83872e-05	0.00320446	2.31164e-05	0.00323886	0.000142973	0.00324088	4.25171e-05
	90.0084		0.00320767	3.45153e-05	0.00320116	3.47404e-05	0.00321509	7.89136e-05	0.00321441	4.17199e-05	0.00319347	2.81646e-05	0.00322591	5.80662e-05	0.00320923	4.20232e-05
	95.0088		0.00323236	6.54561e-05	0.00323943	8.14501e-05	0.00322313	7.99583e-05	0.00319994	1.68262e-05	0.00318259	3.4341e-05	0.00319052	8.6906e-05	0.00319059	4.42689e-05
	%RH	argon
	0		0.000165354	2.4994e-05	0.000160877	1.0645e-05	0.000162341	7.8464e-06	0.000159797	6.1142e-06	0.000160845	6.7584e-06	0.00016224	1.4214e-05	0.000162078	7.4269e-06
	0.00136563		0.000168479	2.07613e-05	0.000158166	1.30657e-05	0.000161506	8.4399e-06	0.00016295	8.6228e-06	0.000159215	5.6422e-06	0.000158795	9.8249e-06	0.000160469	3.8346e-06
	0.0136562		0.000164728	1.96745e-05	0.000157436	1.25808e-05	0.00016474	1.81717e-05	0.00016318	6.5566e-06	0.000161555	7.2363e-06	0.000163076	1.81383e-05	0.00015957	7.4328e-06
	0.0682781		0.000158789	1.01104e-05	0.000171198	8.0923e-06	0.000164323	2.332e-05	0.000165769	6.7678e-06	0.000161242	7.655e-06	0.000160257	1.54712e-05	0.000159946	6.4074e-06
	0.136549		0.000169625	1.90373e-05	0.000161815	1.42439e-05	0.000158376	1.30744e-05	0.000165748	6.8742e-06	0.000162997	9e-06	0.000154828	9.092e-06	0.000164606	7.1122e-06
	0.273071		0.000160248	9.3332e-06	0.000160668	5.9493e-06	0.000167244	1.38506e-05	0.000167377	8.8896e-06	0.00016494	5.8585e-06	0.000160152	1.61523e-05	0.000160301	7.3524e-06
	0.409566		0.000162853	2.24592e-05	0.000165151	1.28948e-05	0.000160254	8.739e-06	0.000162992	4.5678e-06	0.000164334	5.9934e-06	0.000161823	2.02873e-05	0.000163248	5.8154e-06
	0.546033		0.000164103	6.9739e-06	0.00017172	2.3854e-05	0.000160463	1.56094e-05	0.000164475	6.7215e-06	0.000163937	9.3381e-06	0.000160674	7.8517e-06	0.000163122	6.7726e-06
	0.682473		0.000162436	1.27677e-05	0.000167966	8.6078e-06	0.000162132	1.79548e-05	0.00016414	7.1597e-06	0.000165442	8.7263e-06	0.0001589	1.17673e-05	0.000162704	8.6963e-06
	1.36426		0.000160248	7.2666e-06	0.000168488	1.46324e-05	0.000162549	1.91539e-05	0.00016366	9.6073e-06	0.000163227	4.8168e-06	0.000160779	2.42518e-05	0.000164856	7.7337e-06
	1.63679		0.000160561	1.74397e-05	0.000165777	1.62996e-05	0.000164949	1.15314e-05	0.000163994	5.8961e-06	0.000163624	1.31262e-05	0.000163493	2.09367e-05	0.000163686	8.9074e-06
	5.0005		0.000164624	1.63021e-05	0.000162128	8.7481e-06	0.000157541	5.2374e-06	0.00016389	1.03449e-05	0.000162997	7.3688e-06	0.000160466	2.39861e-05	0.000161701	4.7489e-06
	10.001		0.000168271	1.63685e-05	0.000163379	2.70327e-05	0.000164949	1.63425e-05	0.000162575	3.1206e-06	0.000161764	5.114e-06	0.000161927	3.04624e-05	0.000159675	5.7626e-06
	15.0015		0.000163061	1.0888e-05	0.00015973	2.48363e-05	0.00015775	1.48957e-05	0.000161551	4.7203e-06	0.000161221	6.5348e-06	0.000172889	9.4632e-06	0.000163812	5.7647e-06
	20.002		0.00016004	5.247e-06	0.00015337	9.2176e-06	0.000162445	1.51134e-05	0.000160215	7.4383e-06	0.000157335	2.4828e-06	0.000162032	1.11978e-05	0.000160113	7.0195e-06
	25.0025		0.000154101	2.18993e-05	0.000164421	1.62676e-05	0.000159419	7.4829e-06	0.000158879	9.589e-06	0.000158964	2.8145e-06	0.000154515	9.614e-06	0.000160281	4.7082e-06
	30.0029		0.000150141	4.4888e-06	0.000167132	1.11828e-05	0.000159941	2.01401e-05	0.000161301	4.9886e-06	0.000156561	8.6176e-06	0.000156185	1.25178e-05	0.000157042	6.5814e-06
	35.0034		0.00016327	2.03706e-05	0.000155872	1.1722e-05	0.000158585	2.39555e-05	0.000157104	2.5925e-06	0.000158567	5.6305e-06	0.000158377	2.13205e-05	0.000157	8.5737e-06
	40.0039		0.000157539	8.5056e-06	0.000157123	2.30568e-05	0.000161819	2.06293e-05	0.000158106	8.2752e-06	0.000158567	7.2469e-06	0.000155141	1.9016e-05	0.000158693	5.0077e-06
	45.0044		0.000155559	1.16509e-05	0.000152536	2.94573e-05	0.000151073	1.89712e-05	0.000158043	5.1016e-06	0.000157523	1.509e-06	0.000165164	1.14671e-05	0.000153782	6.0572e-06
	50.0048		0.000162124	1.14782e-05	0.000153891	8.9787e-06	0.000156602	1.76491e-05	0.000156937	3.9339e-06	0.000156917	4.4716e-06	0.000153366	1.59075e-05	0.000156311	1.11007e-05
	55.0053		0.000156497	2.82252e-05	0.000160981	9.9438e-06	0.000158689	2.0235e-05	0.000154536	9.881e-06	0.000154242	4.9632e-06	0.000154932	1.3196e-05	0.00015629	5.8594e-06
	60.0057		0.000153997	1.29903e-05	0.00015973	1.12989e-05	0.000156289	1.80177e-05	0.000156164	9.866e-06	0.000156791	4.924e-06	0.000156081	1.07082e-05	0.000155412	7.6481e-06
	65.0062		0.000162853	1.89573e-05	0.000158374	1.86207e-05	0.000156811	2.99387e-05	0.000154682	5.6348e-06	0.000151965	1.4179e-05	0.000154932	1.03014e-05	0.000154347	6.3453e-06
	70.0066		0.000157852	1.40872e-05	0.00015681	1.22018e-05	0.000156707	2.38699e-05	0.000155454	1.01247e-05	0.000154932	4.7829e-06	0.000158377	1.50657e-05	0.00015115	4.7175e-06
	75.0071		0.000159623	1.55467e-05	0.000155559	1.31486e-05	0.000156289	1.19796e-05	0.000153784	2.4493e-06	0.000153072	4.6897e-06	0.000148459	7.0376e-06	0.000151777	2.1365e-06
	80.0075		0.000154413	9.6083e-06	0.000150867	5.6954e-06	0.000151803	1.12175e-05	0.000154348	3.0305e-06	0.000154555	8.3469e-06	0.000146998	1.99907e-05	0.000151066	7.4332e-06
	85.008		0.000146912	7.0667e-06	0.000149512	2.22975e-05	0.000150342	1.18296e-05	0.000151195	5.3568e-06	0.000151463	6.3752e-06	0.000153784	1.75643e-05	0.000150293	8.0562e-06
	90.0084		0.000150871	2.03813e-05	0.000143569	1.08071e-05	0.000156811	1.03199e-05	0.000153491	5.5455e-06	0.000149624	1.05779e-05	0.000152844	3.8727e-06	0.000152195	7.2131e-06
	95.0088		0.000156185	1.74023e-05	0.000149095	8.5724e-06	0.000146378	9.9548e-06	0.00015157	8.4985e-06	0.000150815	5.5511e-06	0.000154306	1.92235e-05	0.000146971	6.4704e-06
		278k
		MOLECULES/UNITCELL
	%RH	tip3p
	0		0	0	0	0	0	0	0	0	0	0	0	0	0	0
	0.0116767		1.00028	0.000815475	2.00029	0.000604649	3.00022	0.000443847	4.00029	0.000284296	4.97356	0.112683	4.00107	0.00242681	5.00024	7.33214e-05
	0.116766		1.00118	0.00192005	2.00224	0.00133019	3.00261	0.00224824	4.00327	0.00122025	5.01433	0.0112511	4.01391	0.017394	5.00429	0.00211766
	0.583806		1.00487	0.0016166	2.00928	0.00506587	3.01133	0.00568607	4.01377	0.00261003	5.06965	0.023195	4.0457	0.0203354	5.01466	0.00530592
	1.16755		1.00913	0.00545998	2.01294	0.00755656	3.02773	0.0139546	4.02844	0.00567077	5.12322	0.037018	4.11076	0.117539	5.03074	0.00589627
	2.33487		1.02059	0.00358226	2.03351	0.0178089	3.04661	0.0276547	4.06029	0.0201273	5.24008	0.0256937	4.24148	0.20585	5.06388	0.0130938
	3.50196		1.02818	0.0279103	2.0589	0.047519	3.06661	0.0251937	4.08446	0.0188191	5.3444	0.0776626	4.34236	0.121308	5.10397	0.0198903
	4.66881		1.02577	0.0136946	2.07002	0.0288656	3.08921	0.0290715	4.11802	0.0264874	5.46005	0.0771342	4.45026	0.155446	5.12089	0.020873
	5.00283		1.0436	0.0269563	2.05842	0.0388708	3.11828	0.0419801	4.12863	0.0231217	5.4583	0.0857754	4.48515	0.267728	5.13626	0.0338483
	5.83543		1.05045	0.0326743	2.08845	0.0610681	3.09172	0.0306761	4.15336	0.0314829	5.57092	0.0816932	4.58441	0.135486	5.15634	0.0243437
	10.0057		1.06743	0.0231355	2.13796	0.0565263	3.19057	0.0334691	4.23935	0.040558	5.77753	0.100445	4.84642	0.283954	5.25291	0.0369659
	11.665		1.08378	0.0330905	2.14756	0.0835839	3.21873	0.0607667	4.29405	0.040748	5.91404	0.0812014	4.91326	0.148364	5.29417	0.0769588
	13.9952		1.10922	0.0628284	2.18892	0.0664303	3.22058	0.0856031	4.34688	0.0478255	6.009	0.0453494	4.96553	0.311407	5.34803	0.103903
	15.0085		1.13987	0.0731562	2.20815	0.0585184	3.24908	0.0490164	4.36426	0.0281878	6.07048	0.127708	5.1387	0.281416	5.37822	0.028211
	20.0113		1.13248	0.0608851	2.25461	0.0877075	3.40232	0.143861	4.5034	0.073784	6.26451	0.0827961	5.31253	0.123187	5.51726	0.0715824
	25.0142		1.19304	0.0713607	2.32904	0.10718	3.42471	0.15966	4.55975	0.1111	6.46968	0.0934616	5.34499	0.247763	5.62402	0.0346421
	30.017		1.18461	0.0797868	2.36856	0.145129	3.52041	0.0642235	4.65952	0.0790734	6.67593	0.100935	5.59213	0.288432	5.70338	0.0464668
	35.0198		1.24177	0.103019	2.35796	0.0980842	3.59339	0.176281	4.76024	0.163636	6.82636	0.159915	5.77606	0.306738	5.85416	0.0755109
	40.0227		1.28409	0.151881	2.48901	0.125234	3.61585	0.224822	4.80231	0.114221	6.91752	0.202408	5.73202	0.229161	5.93552	0.0156243
	45.0255		1.31333	0.0642306	2.56112	0.12267	3.74925	0.0871136	4.95956	0.143682	7.01616	0.167416	5.86956	0.327524	6.01839	0.081241
	50.0283		1.32093	0.0845274	2.5532	0.151511	3.80686	0.24399	5.00136	0.0971721	7.19843	0.140235	5.95756	0.189015	6.11813	0.105268
	55.0312		1.32674	0.12539	2.57618	0.134523	3.79785	0.219856	5.12617	0.0814261	7.3292	0.163889	6.07738	0.172631	6.201	0.116217
	60.034		1.3819	0.191155	2.66507	0.272224	3.99039	0.314409	5.21744	0.161049	7.36676	0.099734	6.17086	0.262376	6.24746	0.136115
	65.0368		1.35621	0.110621	2.6761	0.186495	4.1541	0.255998	5.26011	0.0840257	7.56792	0.10498	6.20683	0.435486	6.35088	0.0817581
	70.0396		1.40545	0.126047	2.7348	0.115456	4.11809	0.152131	5.37743	0.139187	7.627	0.233688	6.29784	0.395602	6.54855	0.154859
	75.0425		1.47189	0.169247	2.83383	0.0763032	4.0087	0.241388	5.41329	0.177217	7.7395	0.32654	6.50572	0.450085	6.65469	0.18639
	80.0453		1.46426	0.144226	2.73918	0.191556	4.16216	0.2222	5.43146	0.184428	7.75487	0.226058	6.61421	0.213059	6.64582	0.0868842
	85.0481		1.50561	0.106317	2.8081	0.147201	4.24373	0.180216	5.55572	0.145575	7.90468	0.304388	6.59297	0.383693	6.6682	0.24106
	90.051		1.50151	0.21428	2.89988	0.181047	4.23324	0.189972	5.64475	0.0422531	7.94977	0.156096	6.6891	0.301243	6.83363	0.0971968
	95.0538		1.53666	0.206688	2.94514	0.124304	4.17915	0.289341	5.68536	0.0993097	8.04889	0.157769	6.80515	0.497202	6.90741	0.237126
	%RH	N2
	0		0.818325	0.00951152	0.8189	0.00969866	0.825085	0.0111179	0.823626	0.00534165	0.823956	0.00859374	0.82087	0.00499934	0.825068	0.0037806
	0.0116767		0.81671	0.0111209	0.8193	0.00919793	0.823545	0.00978291	0.823369	0.00396977	0.821517	0.00579673	0.820385	0.00571818	0.823254	0.00486843
	0.116766		0.81802	0.00935037	0.82348	0.0150836	0.819165	0.00921388	0.819527	0.00428766	0.824028	0.00170536	0.82038	0.0108042	0.823339	0.00711829
	0.583806		0.81804	0.00595009	0.816485	0.011178	0.82243	0.00941655	0.822727	0.00545181	0.821385	0.00566896	0.82158	0.0129202	0.823283	0.0066339
	1.16755		0.817115	0.015122	0.8192	0.00647827	0.82015	0.0246272	0.822542	0.00773245	0.822376	0.00346876	0.821375	0.00705797	0.823251	0.00345546
	2.33487		0.821	0.0149041	0.819495	0.0114738	0.822345	0.017531	0.823931	0.00700126	0.821083	0.00745326	0.82281	0.0182287	0.822221	0.00283612
	3.50196		0.816725	0.0154849	0.817215	0.0116078	0.82053	0.00722478	0.822772	0.00520809	0.820887	0.00291302	0.819775	0.00419583	0.823157	0.00688939
	4.66881		0.816325	0.0131974	0.81845	0.0182271	0.824385	0.0081929	0.820211	0.00461835	0.820876	0.00378001	0.81543	0.0141693	0.822359	0.00252387
	5.00283		0.81702	0.0127229	0.8153	0.00941642	0.81955	0.0108256	0.821883	0.00364289	0.820674	0.00261572	0.822805	0.0129629	0.820867	0.00343356
	5.83543		0.81791	0.00624056	0.815345	0.00939997	0.8253	0.0119625	0.821996	0.00531891	0.81909	0.00324705	0.818155	0.0069858	0.822602	0.0043687
	10.0057		0.81572	0.00861954	0.81566	0.0147053	0.817565	0.00846207	0.821222	0.00504969	0.819607	0.00441394	0.81907	0.0118389	0.821626	0.00469184
	11.665		0.815475	0.0145369	0.81559	0.00763993	0.81737	0.00958564	0.819371	0.00357082	0.818145	0.00323873	0.816635	0.00709074	0.82336	0.00463589
	13.9952		0.817565	0.0117084	0.815115	0.00869567	0.817625	0.00604715	0.819272	0.00142144	0.817042	0.00469216	0.81554	0.00749924	0.819727	0.00404795
	15.0085		0.81834	0.0137894	0.817505	0.00570451	0.817825	0.0140762	0.819664	0.00269751	0.818495	0.00653053	0.81823	0.00801751	0.819351	0.0062369
	20.0113		0.816675	0.00781076	0.814735	0.0101284	0.814685	0.0133788	0.820034	0.00569179	0.815739	0.00368746	0.816425	0.00982751	0.818763	0.00284019
	25.0142		0.81355	0.00181356	0.81924	0.0115492	0.816345	0.00420409	0.818549	0.00343751	0.817479	0.00255753	0.814505	0.00862476	0.819987	0.00308701
	30.017		0.813315	0.0152816	0.811645	0.0127594	0.8177	0.00471275	0.818976	0.00330233	0.815298	0.00286515	0.80909	0.016699	0.819394	0.00586324
	35.0198		0.81225	0.0122108	0.812855	0.00280257	0.820165	0.0115695	0.816022	0.00429758	0.813543	0.00272528	0.816465	0.0127765	0.817108	0.00637011
	40.0227		0.810245	0.00759818	0.818325	0.00863782	0.81569	0.00765216	0.816746	0.00671508	0.816139	0.00484072	0.8124	0.00754473	0.817486	0.00337269
	45.0255		0.813995	0.00963854	0.81174	0.00748923	0.817305	0.0110892	0.815529	0.00951291	0.813127	0.00324739	0.81515	0.013195	0.817538	0.00795774
	50.0283		0.81204	0.00820479	0.812455	0.0111886	0.81287	0.0143618	0.815283	0.00632581	0.81239	0.00145742	0.810655	0.00612433	0.816929	0.00387337
	55.0312		0.811135	0.00949735	0.817135	0.00322639	0.815355	0.00950828	0.816591	0.00504012	0.812162	0.00313533	0.811905	0.00615601	0.815371	0.00392582
	60.034		0.814205	0.00698093	0.809165	0.0101392	0.81895	0.0122739	0.813266	0.00466878	0.810369	0.00863793	0.8118	0.0129918	0.815603	0.00317108
	65.0368		0.813255	0.0193284	0.812155	0.00930287	0.80909	0.00703666	0.814877	0.00411259	0.810426	0.0042917	0.80802	0.00657384	0.813962	0.00498075
	70.0396		0.81026	0.0119101	0.812045	0.00865537	0.812165	0.00305722	0.811827	0.0078022	0.809723	0.00317897	0.81317	0.0070138	0.813035	0.00666296
	75.0425		0.81719	0.0107485	0.813275	0.011397	0.80622	0.0124899	0.811662	0.00175191	0.809767	0.00552499	0.805975	0.0106248	0.811175	0.00580444
	80.0453		0.815245	0.0141469	0.812355	0.0145319	0.810875	0.012738	0.81154	0.00246454	0.810177	0.00245783	0.80762	0.0135442	0.811335	0.00159797
	85.0481		0.80555	0.00473138	0.815195	0.0155793	0.807795	0.00441094	0.811878	0.00512093	0.808634	0.00245605	0.809575	0.0120728	0.811938	0.00341934
	90.051		0.81064	0.0152056	0.813645	0.00287826	0.80523	0.0140975	0.811587	0.00473785	0.809499	0.00429179	0.806785	0.0102269	0.810979	0.00684065
	95.0538		0.80581	0.00953124	0.80299	0.00719768	0.80729	0.0136162	0.812274	0.00440015	0.805844	0.00454242	0.80726	0.00630465	0.809519	0.00407361
	%RH	O2
	0		0.227755	0.00446838	0.227785	0.00592441	0.229705	0.00478167	0.227757	0.00212153	0.226385	0.000864384	0.22703	0.00309183	0.226938	0.00159309
	0.0116767		0.228205	0.00502309	0.22808	0.0034565	0.227635	0.00494566	0.225729	0.00108904	0.226216	0.00170495	0.22781	0.00538308	0.226495	0.00229947
	0.116766		0.229265	0.00561192	0.22664	0.00269009	0.22729	0.00187579	0.226412	0.00153556	0.226729	0.00204058	0.227555	0.00493998	0.226672	0.00183329
	0.583806		0.229035	0.00427254	0.227315	0.00345045	0.2284	0.00370729	0.226871	0.00135423	0.226405	0.00322723	0.22719	0.00902666	0.226613	0.00194926
	1.16755		0.23052	0.00381476	0.22837	0.00593325	0.2269	0.00310435	0.227664	0.00243364	0.226035	0.00164037	0.22798	0.00790401	0.226144	0.00187824
	2.33487		0.22731	0.00163297	0.226665	0.00604472	0.227085	0.00604521	0.227622	0.00223506	0.226394	0.00242656	0.22979	0.00487284	0.226376	0.002126
	3.50196		0.22843	0.00289265	0.225045	0.00441762	0.22575	0.00492818	0.226713	0.00195439	0.226044	0.00207035	0.226365	0.00508808	0.226383	0.00220719
	4.66881		0.228295	0.00472402	0.22761	0.00883966	0.226065	0.00637664	0.226951	0.00212206	0.225629	0.00226944	0.22643	0.00522268	0.226758	0.00193852
	5.00283		0.228545	0.00381725	0.22695	0.00305172	0.22764	0.00559684	0.226678	0.00164551	0.225188	0.00180153	0.227115	0.00550905	0.226427	0.00268005
	5.83543		0.22771	0.00541014	0.22858	0.00321347	0.22852	0.00491929	0.226609	0.00195853	0.225957	0.00172091	0.225265	0.00361215	0.226006	0.00220798
	10.0057		0.229905	0.00434366	0.22847	0.00335491	0.227495	0.00319475	0.225998	0.00207808	0.225074	0.00186513	0.22593	0.00640745	0.226157	0.00183093
	11.665		0.22828	0.00445841	0.229355	0.00642973	0.226245	0.00366025	0.226049	0.00184656	0.226391	0.000978292	0.22831	0.00665467	0.226264	0.00220414
	13.9952		0.226945	0.00514202	0.225745	0.00607136	0.227935	0.0043896	0.226392	0.00144314	0.225339	0.00288149	0.226475	0.00763381	0.226689	0.00183549
	15.0085		0.229685	0.00438276	0.228865	0.00541411	0.226225	0.00212603	0.226862	0.00186468	0.225312	0.00319532	0.225965	0.00371303	0.22543	0.00258199
	20.0113		0.228	0.0070209	0.22614	0.00351164	0.22701	0.00290114	0.226365	0.00286156	0.226361	0.00185337	0.228565	0.0042231	0.22558	0.00134499
	25.0142		0.22643	0.00381437	0.230055	0.00681465	0.226385	0.00191484	0.226553	0.00115803	0.224883	0.00232452	0.22741	0.00631329	0.226068	0.00247248
	30.017		0.227895	0.00340726	0.226875	0.00275699	0.225895	0.00786774	0.225117	0.00267415	0.224914	0.00215912	0.22674	0.00554478	0.225523	0.00264421
	35.0198		0.227665	0.00565532	0.224075	0.0074409	0.225835	0.00761299	0.225023	0.00111704	0.224775	0.00274538	0.226005	0.00435033	0.225044	0.00171739
	40.0227		0.226355	0.00394707	0.224925	0.00639023	0.22536	0.00198081	0.225946	0.00236656	0.225152	0.00216104	0.22698	0.00295185	0.225113	0.00227245
	45.0255		0.226765	0.00454561	0.225645	0.00315585	0.225645	0.00553691	0.2248	0.00373249	0.224481	0.00195805	0.2254	0.00306904	0.224798	0.00135933
	50.0283		0.22706	0.00169044	0.225635	0.0022074	0.22687	0.00525066	0.225293	0.00244534	0.225408	0.00150125	0.22434	0.00176878	0.225814	0.00195435
	55.0312		0.22705	0.00354076	0.22679	0.00553323	0.22621	0.00384364	0.22421	0.00181521	0.223983	0.00168281	0.224385	0.00376359	0.225523	0.00178051
	60.034		0.22567	0.00321736	0.22572	0.00563998	0.22604	0.0047911	0.224243	0.000726873	0.223614	0.00233222	0.225215	0.00218165	0.225256	0.00299129
	65.0368		0.2263	0.00446307	0.22612	0.00507212	0.226695	0.00606625	0.224823	0.00103685	0.223794	0.00242885	0.225085	0.00694749	0.224888	0.00300487
	70.0396		0.22758	0.00362262	0.225965	0.00433585	0.22282	0.00391272	0.224317	0.000752027	0.223461	0.00193999	0.22664	0.00383596	0.224071	0.00124928
	75.0425		0.2265	0.00384669	0.225785	0.00503275	0.22282	0.00217725	0.224175	0.00226582	0.224196	0.00199495	0.224095	0.00496018	0.224003	0.00111915
	80.0453		0.227015	0.00353435	0.227025	0.00489336	0.225085	0.00523207	0.224576	0.0018713	0.223358	0.00109845	0.22382	0.00484194	0.224765	0.000815426
	85.0481		0.225945	0.000859884	0.226695	0.00645549	0.22405	0.00158808	0.224242	0.00173087	0.223271	0.00156548	0.22201	0.00251647	0.224067	0.00153161
	90.051		0.22844	0.00893994	0.226145	0.00370694	0.22277	0.00328685	0.224669	0.00193287	0.223255	0.00181279	0.222625	0.00233838	0.223245	0.0021528
	95.0538		0.22501	0.0069177	0.225435	0.00403926	0.223935	0.0074285	0.224228	0.00099797	0.223109	0.0016372	0.225975	0.00531987	0.223722	0.00115877
	%RH	argon
	0		0.01079	0.00119817	0.01068	0.000864523	0.01068	0.000720694	0.010749	0.000402065	0.010774	0.000281879	0.01095	0.000500999	0.010663	0.000379189
	0.0116767		0.01059	0.000728423	0.01069	0.000361386	0.010895	0.000832706	0.010667	0.000111283	0.010753	0.000630955	0.01071	0.00087155	0.010607	0.000430423
	0.116766		0.010765	0.000512445	0.010715	0.000750067	0.010495	0.000818169	0.010664	0.00044079	0.010708	0.000492934	0.010495	0.00110968	0.010724	0.000299693
	0.583806		0.010735	0.000708237	0.010815	0.000988231	0.010745	0.000703847	0.01069	0.000382361	0.010606	0.000396858	0.010595	0.000612699	0.010753	0.000286049
	1.16755		0.010785	0.000879545	0.01115	0.0012276	0.010345	0.00104135	0.010466	0.000413976	0.010638	0.000438798	0.01057	0.00133881	0.010527	0.000379399
	2.33487		0.010875	0.000714843	0.0109	0.000965402	0.01082	0.000727599	0.010601	0.00058146	0.010793	0.000218778	0.01076	0.000753392	0.010744	0.000275274
	3.50196		0.0107	0.00118406	0.01059	0.000984683	0.010995	0.00124113	0.010715	0.000458868	0.010724	0.000464043	0.010755	0.000864523	0.010663	0.000276159
	4.66881		0.011	0.000884873	0.010515	0.00119063	0.011155	0.00126032	0.010707	0.000514921	0.01063	0.000152578	0.010885	0.00158228	0.01071	0.000262069
	5.00283		0.010465	0.000589576	0.010685	0.00108425	0.01061	0.00111472	0.010522	0.000361751	0.010841	0.000396656	0.01046	0.000889157	0.010815	0.000433313
	5.83543		0.010805	0.000967161	0.01077	0.00126071	0.010685	0.00109663	0.010526	0.000372688	0.010666	0.00049491	0.010585	0.000797872	0.010791	0.00040568
	10.0057		0.010875	0.00107098	0.010785	0.00208197	0.010275	0.000889944	0.010682	0.000480691	0.010626	0.000428504	0.01072	0.00117703	0.010603	0.000305457
	11.665		0.010795	0.00113728	0.01074	0.000890842	0.01069	0.00136367	0.010741	0.00046106	0.010681	0.000458668	0.01066	0.00115655	0.010611	0.000541125
	13.9952		0.010395	0.000689493	0.01061	0.000607124	0.01069	0.000750067	0.010571	0.000443414	0.010625	0.000545784	0.0111	0.000707107	0.010615	0.000243721
	15.0085		0.01061	0.000698284	0.01112	0.00118169	0.01067	0.00031209	0.010712	0.000596309	0.010778	0.000589698	0.01085	0.000863134	0.010691	0.000549887
	20.0113		0.01092	0.00140584	0.01075	0.000888819	0.010645	0.000930269	0.010436	0.00031524	0.010672	0.000298637	0.010625	0.000421901	0.010716	0.000312756
	25.0142		0.01067	0.00094414	0.010865	0.00115611	0.01081	0.000766551	0.010798	0.000292479	0.010666	0.000437648	0.01033	0.00081265	0.010755	0.000358999
	30.017		0.01068	0.000989141	0.0102	0.000745654	0.010905	0.000276405	0.010613	0.000381292	0.010681	0.00037102	0.01049	0.00113605	0.010886	0.000457445
	35.0198		0.010415	0.00112454	0.01103	0.00100866	0.010535	0.00117414	0.010739	0.00042743	0.010588	0.000560343	0.010745	0.000648383	0.010645	0.000324037
	40.0227		0.011165	0.000186011	0.011	0.000704982	0.01074	0.000654676	0.010651	0.000228333	0.010626	0.000259569	0.01035	0.000432435	0.010607	0.000431119
	45.0255		0.01086	0.000902552	0.010705	0.00114952	0.011015	0.00139914	0.010584	0.000417488	0.010554	0.000506731	0.010635	0.00111023	0.010456	0.000201931
	50.0283		0.010965	0.000454533	0.010745	0.000987117	0.01118	0.000792717	0.010735	0.000431138	0.010518	0.000591493	0.01063	0.00114996	0.010459	0.00051121
	55.0312		0.011205	0.0010547	0.01095	0.000630079	0.010955	0.000877154	0.010812	0.000267178	0.010731	0.000495718	0.01103	0.00106743	0.010687	0.000384479
	60.034		0.010715	0.00127695	0.01077	0.000985596	0.01083	0.00073171	0.010602	0.000420695	0.010471	0.000283154	0.010525	0.0010015	0.010784	0.00020663
	65.0368		0.010635	0.00153284	0.01093	0.00154835	0.01072	0.000738512	0.010479	0.000147296	0.010605	0.00039945	0.01047	0.000920543	0.010671	0.000197929
	70.0396		0.01055	0.000352136	0.010725	0.000652687	0.010385	0.000445646	0.010719	0.000376797	0.010516	0.000471864	0.01069	0.00103759	0.010502	0.000199259
	75.0425		0.010825	0.000981326	0.010615	0.000928763	0.010425	0.000630079	0.010589	0.00034231	0.01048	0.000484025	0.01067	0.00179928	0.010673	0.000366366
	80.0453		0.010535	0.00101814	0.010815	0.00127224	0.010765	0.00093787	0.010576	0.000286175	0.010472	0.000304145	0.010415	0.000265707	0.010722	0.000434999
	85.0481		0.010455	0.000724845	0.010955	0.000872009	0.010715	0.000917932	0.010642	0.000423349	0.010627	0.000340388	0.01023	0.000664379	0.010782	0.000191479
	90.051		0.01021	0.000476025	0.010505	0.000795864	0.010305	0.00031686	0.01038	0.000326067	0.010557	0.000167881	0.010355	0.000700286	0.010494	0.000254354
	95.0538		0.01099	0.000486415	0.01098	0.00112134	0.010585	0.000931987	0.010628	0.000296823	0.010563	0.000336904	0.01068	0.00133843	0.01063	0.000619839
		298k
		MOLECULES/UNITCELL
	%RH	tip3p
	0		0	0	0	0	0	0	0	0	0	0	0	0	0	0
	0.00318445		1.00005	8e-05	2.0001	0.000327109	3.00005	0.000104881	4.00009	0.000116859	4.88443	0.220868	4.0009	0.00265141	5.00007	9.859e-05
	0.0318442		1.00012	0.000191311	2.00061	0.000411825	3.00041	0.000256125	4.0012	0.000371139	4.99958	0.0212679	4.00466	0.00465903	5.0008	0.000217899
	0.159215		1.00263	0.00437191	2.00244	0.00196148	3.0044	0.00650772	4.00531	0.00163576	5.01979	0.0198365	4.02105	0.0224461	5.00561	0.00163544
	0.318414		1.00263	0.00167613	2.00348	0.00225885	3.00716	0.00455221	4.00986	0.00410854	5.035	0.0114869	4.03651	0.0334655	5.00993	0.00297067
	0.636764		1.00527	0.00760756	2.01309	0.0109834	3.01431	0.00643837	4.01762	0.0027576	5.07947	0.035972	4.0835	0.0850165	5.02045	0.00566613
	0.95505		1.01151	0.0115199	2.01246	0.0104357	3.02477	0.0120264	4.02547	0.00438313	5.10478	0.00939441	4.10269	0.0354704	5.03474	0.00933612
	1.27327		1.01157	0.0111672	2.01783	0.0102224	3.02801	0.015615	4.03053	0.00694274	5.14234	0.0326167	4.14358	0.0693186	5.04221	0.0106714
	1.59143		1.01408	0.0116548	2.03193	0.0176361	3.04386	0.0232544	4.04667	0.00546989	5.18602	0.0386559	4.18973	0.0436945	5.05075	0.00479244
	3.18127		1.04304	0.0256648	2.05162	0.0109941	3.09281	0.0126034	4.09279	0.0155923	5.35263	0.0451087	4.35004	0.282986	5.10455	0.0160243
	3.81676		1.03741	0.0235734	2.06676	0.0116734	3.09062	0.0389611	4.10987	0.01057	5.3856	0.136651	4.33634	0.163918	5.12018	0.0153032
	5.0005		1.04763	0.0238	2.09174	0.0591714	3.11232	0.0344198	4.14182	0.00890367	5.48485	0.0755692	4.5324	0.198183	5.15422	0.0397042
	10.001		1.10197	0.0262141	2.1986	0.0505922	3.21441	0.0784424	4.27222	0.0322	5.80208	0.0952113	4.87415	0.210718	5.31092	0.0535055
	15.0015		1.12965	0.0320722	2.22117	0.0826165	3.33119	0.110365	4.41543	0.029115	6.12643	0.170196	5.08178	0.252903	5.45834	0.103818
	20.002		1.18188	0.0711099	2.32358	0.0691509	3.43417	0.242874	4.57363	0.0287954	6.33656	0.137093	5.29978	0.208672	5.59004	0.0782496
	25.0025		1.19334	0.0678199	2.32747	0.0361223	3.57085	0.0483632	4.67608	0.0719742	6.52729	0.0841662	5.56527	0.171013	5.69744	0.0644871
	30.003		1.29117	0.0637973	2.41946	0.180698	3.68433	0.196305	4.78236	0.0942497	6.7	0.290075	5.56764	0.172794	5.81573	0.0821083
	35.0035		1.27202	0.0743902	2.4707	0.144366	3.7084	0.203457	4.89632	0.111803	6.9078	0.139189	5.7593	0.177337	5.96555	0.112199
	40.004		1.34641	0.0820691	2.56672	0.227232	3.73491	0.116031	4.9485	0.13316	7.06719	0.244262	5.85578	0.217179	6.02966	0.126052
	45.0044		1.34057	0.142925	2.65634	0.17292	3.83005	0.206991	5.11813	0.13081	7.18891	0.10466	6.14084	0.158176	6.2245	0.140691
	50.0049		1.36615	0.140378	2.66757	0.143229	3.84069	0.225716	5.16112	0.0500235	7.34519	0.104566	6.19109	0.273395	6.31752	0.0876835
	55.0054		1.39637	0.114212	2.74749	0.131447	4.05157	0.267041	5.28864	0.246339	7.55009	0.108149	6.30389	0.612671	6.40491	0.0777214
	60.0059		1.48158	0.081777	2.85065	0.1403	4.08387	0.272019	5.45262	0.108782	7.62207	0.136853	6.49693	0.674553	6.56108	0.0831406
	65.0064		1.52219	0.0900008	2.84719	0.229586	4.18574	0.229239	5.49811	0.147514	7.70206	0.237295	6.51468	0.392859	6.68039	0.125593
	70.0068		1.43223	0.103925	2.87344	0.159517	4.19522	0.243682	5.59657	0.121275	7.79536	0.203143	6.56074	0.229462	6.71614	0.141329
	75.0073		1.54316	0.17781	2.99341	0.256862	4.22912	0.272015	5.67314	0.204489	7.96545	0.186353	6.63493	0.524904	6.93083	0.233962
	80.0078		1.5648	0.08408	2.91736	0.136493	4.40435	0.357563	5.69066	0.0743854	8.16826	0.107195	6.73109	0.471864	6.93326	0.096652
	85.0083		1.61599	0.169856	3.07077	0.404098	4.41885	0.268073	5.84722	0.126528	8.20484	0.048679	6.84006	0.223843	7.14232	0.223709
	90.0087		1.59066	0.186009	3.02814	0.135635	4.43211	0.251568	5.95686	0.128212	8.24959	0.355454	6.97952	0.435189	7.177	0.232856
	95.0092		1.57394	0.133312	3.07619	0.163251	4.50981	0.322458	5.94227	0.108632	8.4532	0.205887	7.10151	0.443889	7.45	0.455523
	%RH	N2
	0		0.67792	0.0048606	0.67621	0.00900681	0.684105	0.00860072	0.684496	0.00350649	0.685918	0.00533101	0.676225	0.00559982	0.683374	0.0046226
	0.00318445		0.676955	0.00689314	0.683085	0.00947642	0.684775	0.0106902	0.681292	0.00238982	0.68117	0.00559332	0.686975	0.00804108	0.68141	0.00705873
	0.0318442		0.68508	0.00518801	0.68186	0.00962541	0.68133	0.00671531	0.682888	0.00528483	0.680548	0.00496891	0.68247	0.0126951	0.684325	0.00485652
	0.159215		0.681225	0.00837556	0.683435	0.00774161	0.680995	0.0112928	0.682037	0.00278254	0.683367	0.00492151	0.6843	0.0127267	0.683597	0.00668094
	0.318414		0.68106	0.00844355	0.68129	0.0075711	0.681015	0.00628686	0.681252	0.00324351	0.68161	0.00293322	0.674175	0.00557198	0.683635	0.00640521
	0.636764		0.677255	0.0063059	0.678765	0.0056562	0.68127	0.0087409	0.681896	0.00177642	0.680931	0.0040383	0.67953	0.0117363	0.682742	0.00291706
	0.95505		0.68338	0.00728707	0.6858	0.00394778	0.680865	0.0114224	0.684164	0.0031521	0.682639	0.00172502	0.6822	0.00760697	0.683743	0.00811387
	1.27327		0.685745	0.00415865	0.68113	0.0136236	0.68214	0.00682954	0.682151	0.00541183	0.6834	0.00572697	0.68128	0.00611174	0.68337	0.0034127
	1.59143		0.68338	0.0103095	0.683	0.0038304	0.685245	0.00423408	0.682789	0.00271951	0.681288	0.00503911	0.685275	0.0102071	0.681088	0.00409892
	3.18127		0.67331	0.00871766	0.680255	0.00942419	0.678375	0.0109966	0.68267	0.00266503	0.68204	0.00193704	0.68009	0.0102171	0.683404	0.00464257
	3.81676		0.67845	0.00886566	0.684605	0.00917204	0.67704	0.0080344	0.680663	0.00335238	0.681594	0.0041884	0.683365	0.0139324	0.682691	0.00318463
	5.0005		0.678145	0.0110622	0.67796	0.0158573	0.681585	0.00785415	0.682671	0.00462723	0.681317	0.0044142	0.679945	0.00563395	0.681979	0.00565205
	10.001		0.68028	0.00661524	0.681805	0.00731925	0.67812	0.00649557	0.67931	0.00469023	0.678444	0.00596322	0.675535	0.00825728	0.680053	0.00237051
	15.0015		0.67836	0.004669	0.676775	0.0097226	0.67639	0.00883304	0.678855	0.00316059	0.677527	0.00354445	0.677345	0.00911792	0.678361	0.00368577
	20.002		0.676755	0.00701024	0.67582	0.00887127	0.67587	0.0123174	0.677043	0.0043747	0.674786	0.00573436	0.672885	0.0101097	0.676531	0.00468427
	25.0025		0.680445	0.0157441	0.673475	0.00887277	0.674215	0.0054045	0.675124	0.00405537	0.674046	0.00141501	0.673005	0.0118112	0.67504	0.00241323
	30.003		0.67372	0.00485257	0.675365	0.0111841	0.670485	0.010461	0.675064	0.00742253	0.672324	0.00283653	0.672475	0.0199931	0.674884	0.00431208
	35.0035		0.67555	0.0125537	0.67283	0.0117163	0.67437	0.0140782	0.672075	0.00467534	0.669946	0.00530635	0.668745	0.00808068	0.673354	0.00332841
	40.004		0.670145	0.0115945	0.670635	0.00812512	0.6717	0.0149511	0.670627	0.00718195	0.668353	0.00604422	0.673045	0.0122489	0.670868	0.00375426
	45.0044		0.667795	0.00714321	0.67051	0.0117102	0.669145	0.00726006	0.668067	0.00423683	0.66833	0.00485545	0.667975	0.00526165	0.668992	0.00312264
	50.0049		0.670705	0.00916746	0.66835	0.00796618	0.671965	0.0107623	0.66827	0.00296549	0.66566	0.00553721	0.66828	0.00955497	0.669787	0.00550051
	55.0054		0.667835	0.00888519	0.666755	0.00924064	0.66417	0.00915917	0.666928	0.00377871	0.663353	0.00480519	0.665415	0.00824461	0.667251	0.00187571
	60.0059		0.66467	0.00805459	0.66735	0.0132281	0.66691	0.011665	0.664904	0.00479352	0.665267	0.00320996	0.665955	0.0104553	0.667107	0.00415015
	65.0064		0.667765	0.0107686	0.663755	0.0129611	0.663885	0.0113399	0.665183	0.00505513	0.663794	0.00203954	0.661925	0.0102037	0.662636	0.00219306
	70.0068		0.665735	0.00767233	0.662625	0.0071508	0.66238	0.0207205	0.662862	0.00167672	0.661361	0.00386675	0.66145	0.00782483	0.662985	0.00460764
	75.0073		0.66337	0.0113235	0.66464	0.0105635	0.66406	0.00434265	0.659796	0.00323213	0.659749	0.00452892	0.661755	0.00748595	0.660637	0.00367002
	80.0078		0.66208	0.00919785	0.665135	0.00842844	0.661675	0.00972281	0.660491	0.00796137	0.6592	0.004926	0.659405	0.00754131	0.661045	0.00369885
	85.0083		0.66319	0.00331988	0.659945	0.00697699	0.658375	0.00927658	0.658631	0.00500478	0.658586	0.00402749	0.654695	0.00811815	0.658094	0.00493175
	90.0087		0.66045	0.00876653	0.65709	0.0109507	0.657165	0.0102195	0.658695	0.00402788	0.657652	0.00387682	0.6567	0.00474384	0.658162	0.00521625
	95.0092		0.659325	0.00751206	0.657955	0.0152841	0.658505	0.0106357	0.656632	0.003114	0.654096	0.00721373	0.65106	0.00258778	0.656889	0.00365628
	%RH	O2
	0		0.186675	0.00702019	0.18814	0.00258681	0.188575	0.00550627	0.189667	0.00160686	0.187907	0.00120922	0.18774	0.00537528	0.187502	0.000692
	0.00318445		0.189	0.00619758	0.18851	0.00324278	0.189245	0.00241524	0.188448	0.000326227	0.187857	0.00239543	0.190165	0.00235172	0.187666	0.00326736
	0.0318442		0.189375	0.00233431	0.18989	0.00734245	0.189245	0.00123831	0.188142	0.0011109	0.187366	0.000979253	0.18916	0.00364302	0.187432	0.00203378
	0.159215		0.190225	0.00518777	0.186645	0.00457498	0.187745	0.00563049	0.188259	0.00156833	0.187323	0.00136046	0.188555	0.0040038	0.188256	0.000311024
	0.318414		0.18944	0.00399707	0.188165	0.00363739	0.189105	0.00513648	0.188128	0.000893635	0.187139	0.000502052	0.187825	0.00327261	0.188345	0.00149023
	0.636764		0.18892	0.00785973	0.186315	0.0033292	0.187155	0.00425199	0.188205	0.000885776	0.187962	0.00178649	0.186875	0.00456957	0.188425	0.00235148
	0.95505		0.18953	0.00378621	0.187365	0.0022074	0.18851	0.00404309	0.188483	0.00173276	0.187543	0.00306717	0.18756	0.0043937	0.187519	0.00203636
	1.27327		0.188	0.00392505	0.18863	0.00728487	0.18721	0.00309622	0.188323	0.000678398	0.187375	0.000707305	0.18648	0.00459363	0.188654	0.00302111
	1.59143		0.19159	0.00182362	0.189325	0.00526574	0.189985	0.00235257	0.187676	0.000870319	0.187534	0.003505	0.18718	0.00507557	0.187814	0.00194674
	3.18127		0.188285	0.00107313	0.18863	0.00400043	0.187075	0.00525309	0.18798	0.00295344	0.18683	0.000721138	0.18798	0.00385025	0.188041	0.0016158
	3.81676		0.188875	0.00490092	0.19129	0.00687914	0.18785	0.00370419	0.188139	0.00129739	0.186535	0.00186834	0.188185	0.00604687	0.187828	0.00156432
	5.0005		0.188745	0.00450171	0.18684	0.00444585	0.187675	0.00635555	0.188357	0.00137626	0.186515	0.000880568	0.1874	0.00241723	0.187525	0.00179489
	10.001		0.189855	0.00516405	0.185835	0.00420305	0.186995	0.005942	0.18825	0.00132745	0.186899	0.00194272	0.18658	0.00337808	0.187116	0.00196101
	15.0015		0.18611	0.00223128	0.187275	0.00251813	0.186625	0.00434707	0.186657	0.00215867	0.18567	0.00116667	0.18668	0.00144859	0.18712	0.00228362
	20.002		0.187275	0.0034434	0.186955	0.0065167	0.187265	0.00421777	0.186554	0.00193662	0.185605	0.0015894	0.184655	0.00562622	0.185735	0.00274309
	25.0025		0.18794	0.00375201	0.18731	0.00470251	0.185355	0.00325675	0.185805	0.00146649	0.185674	0.00191005	0.186685	0.00635552	0.185817	0.0015354
	30.003		0.18864	0.00350351	0.18702	0.00241959	0.184615	0.00428376	0.186185	0.0021987	0.185196	0.00181663	0.18327	0.00454317	0.186031	0.00192389
	35.0035		0.188785	0.00398254	0.186555	0.0032392	0.18696	0.00360161	0.18538	0.00193703	0.184518	0.00291248	0.18524	0.00360203	0.185415	0.00250853
	40.004		0.18673	0.00423927	0.186225	0.00635736	0.184935	0.0049602	0.18489	0.00199937	0.184155	0.00237561	0.18487	0.00340006	0.18462	0.00210421
	45.0044		0.18676	0.00504337	0.18681	0.00202277	0.186465	0.00420102	0.184051	0.00215387	0.184241	0.00231896	0.18367	0.00284172	0.183854	0.00171068
	50.0049		0.185195	0.00286154	0.184525	0.00276857	0.18402	0.00287148	0.185434	0.00165681	0.183596	0.00167381	0.182785	0.00231487	0.18441	0.00102045
	55.0054		0.18701	0.0026288	0.18646	0.00588563	0.182935	0.00848001	0.183977	0.00180092	0.183027	0.00181157	0.182765	0.00547308	0.183601	0.00133642
	60.0059		0.18447	0.00307317	0.184975	0.00309386	0.18548	0.00527706	0.183944	0.00101653	0.182591	0.00361756	0.18462	0.00305948	0.183355	0.00118134
	65.0064		0.185575	0.00416689	0.18475	0.00507031	0.18339	0.00438892	0.183072	0.00228214	0.181998	0.00117275	0.183275	0.00131871	0.18266	0.00154908
	70.0068		0.18408	0.00378198	0.1843	0.00563924	0.18258	0.00630931	0.182725	0.00200331	0.181883	0.0015487	0.181465	0.00587772	0.182463	0.00121976
	75.0073		0.183925	0.00465446	0.18345	0.00357141	0.182405	0.00559736	0.18149	0.0019653	0.182265	0.00184332	0.18294	0.00228443	0.181671	0.00121639
	80.0078		0.18479	0.00312163	0.183895	0.00650357	0.182815	0.00232177	0.182101	0.000924411	0.181043	0.00174345	0.181405	0.00274325	0.18189	0.00149014
	85.0083		0.1852	0.00337179	0.183535	0.00383531	0.18162	0.00303041	0.181616	0.00141583	0.181671	0.00194839	0.18175	0.0040978	0.1818	0.00141006
	90.0087		0.183335	0.00288472	0.18098	0.00470089	0.183175	0.00220567	0.181626	0.00224396	0.180551	0.00306235	0.180715	0.0033521	0.180845	0.00273294
	95.0092		0.182665	0.00318537	0.182815	0.00312404	0.18157	0.00309167	0.181317	0.00165543	0.18064	0.0016566	0.181215	0.00288524	0.180747	0.000937968
	%RH	argon
	0		0.00895	0.00049295	0.00914	0.00104528	0.00896	0.00115784	0.00881	0.00063605	0.008789	0.000397764	0.00857	0.00173908	0.008879	0.000254825
	0.00318445		0.009005	0.000759868	0.009155	0.000354119	0.008925	0.000985901	0.008779	0.000462748	0.008723	0.000553845	0.008975	0.000713442	0.008843	0.000369302
	0.0318442		0.008705	0.000803368	0.008945	0.00107861	0.00879	0.000393192	0.008791	0.00028951	0.008745	0.000412068	0.008705	0.000539815	0.008857	0.000415962
	0.159215		0.008755	0.00104661	0.00888	0.00130668	0.00872	0.000603655	0.008787	0.000270599	0.008879	0.000462575	0.00923	0.00066888	0.008657	0.000230269
	0.318414		0.00884	0.000745386	0.0086	0.000744983	0.008525	0.000550454	0.008815	9.31665e-05	0.0089	0.000556201	0.008495	0.0011855	0.008775	0.000361718
	0.636764		0.008725	0.000527257	0.00899	0.000618547	0.00888	0.000741889	0.008851	0.00028407	0.008619	0.000459626	0.008555	0.000608605	0.009068	0.000319662
	0.95505		0.009	0.00056921	0.009255	0.000669627	0.008845	0.00082	0.0089	0.000267357	0.008623	0.000612098	0.008985	0.00132045	0.008871	0.000348218
	1.27327		0.00874	0.00118093	0.00901	0.000774984	0.00906	0.00103566	0.008853	0.000533764	0.008677	0.000391643	0.008555	0.000828493	0.008829	0.000384364
	1.59143		0.009	0.000641093	0.00866	0.00114438	0.009065	0.000604649	0.008951	0.000285195	0.008757	0.000102489	0.00874	0.000456727	0.008773	0.000197646
	3.18127		0.008965	0.000581893	0.00882	0.000570438	0.008925	0.000228035	0.00877	0.000329302	0.008683	0.000414565	0.008925	0.0011077	0.008809	0.000533119
	3.81676		0.0088	0.0008228	0.008765	0.000870977	0.00899	0.000573236	0.008847	0.000324752	0.008728	0.000324259	0.00896	0.00051923	0.008956	0.000349308
	5.0005		0.00878	0.000628808	0.00841	0.000663777	0.008775	0.000859069	0.008626	0.000253409	0.008702	0.00044261	0.00897	0.000448776	0.008881	0.000171394
	10.001		0.00893	0.000622415	0.009355	0.000912907	0.008405	0.00142878	0.008743	8.61626e-05	0.008699	0.000166421	0.0088	0.000933809	0.00902	0.000451088
	15.0015		0.008885	0.00134112	0.008965	0.00153414	0.0088	0.0006245	0.008954	0.000261641	0.008749	0.000329327	0.00849	0.00124603	0.008805	0.00016947
	20.002		0.008715	0.000314006	0.008895	0.000828493	0.00822	0.000898554	0.008916	0.000140485	0.008705	0.000358385	0.00856	0.00094689	0.008985	9.40213e-05
	25.0025		0.008885	0.000551906	0.008955	0.000649153	0.008925	0.000419523	0.008824	0.000398065	0.008755	0.000368673	0.008555	0.000396737	0.008864	0.000329812
	30.003		0.00874	0.000805357	0.008955	0.00116379	0.008695	0.000679264	0.008737	0.000268	0.008756	0.000609078	0.00884	0.00114438	0.008853	0.000130015
	35.0035		0.0085	0.00105736	0.00867	0.000504381	0.00904	0.000882383	0.008729	0.000350565	0.008577	0.000414854	0.008925	0.000796869	0.008868	0.000487836
	40.004		0.00913	0.000791454	0.008445	0.000688041	0.00847	0.000790822	0.008674	0.000253014	0.008729	0.00058376	0.008075	0.000634035	0.00864	0.00038704
	45.0044		0.008575	0.0010015	0.008835	0.00051342	0.008735	0.000588727	0.008686	0.000266863	0.008554	0.000216832	0.0084	0.000853229	0.008719	0.000260569
	50.0049		0.0088	0.000461519	0.0088	0.00067231	0.00861	0.000831024	0.008678	0.000519985	0.008549	0.000180377	0.008635	0.00113693	0.008733	0.000365984
	55.0054		0.00852	0.000715821	0.008145	0.000862786	0.00858	0.000555338	0.008626	0.000440245	0.008504	0.000444945	0.00861	0.0012168	0.008738	0.00030761
	60.0059		0.00884	0.00100628	0.008825	0.00128725	0.009	0.00060663	0.008432	0.000256484	0.008534	0.000353463	0.008725	0.000506952	0.008403	0.000439345
	65.0064		0.00885	0.000582237	0.008845	0.000688767	0.00876	0.000651613	0.008759	0.000263697	0.008488	0.000363241	0.00893	0.000446542	0.008697	0.000471364
	70.0068		0.009065	0.000484355	0.00899	0.000691809	0.008795	0.000821827	0.008668	0.000430702	0.008525	0.000429511	0.00911	0.00069685	0.00881	0.00017309
	75.0073		0.00854	0.000688186	0.008755	0.00112756	0.00897	0.000855219	0.008637	0.000382967	0.00833	0.000284535	0.00849	0.000838809	0.00856	0.000210808
	80.0078		0.008525	0.00136345	0.00902	0.00116936	0.0083	0.000687023	0.008673	0.000182165	0.008416	0.000427383	0.008485	0.000957392	0.008649	0.000423197
	85.0083		0.00854	0.000382884	0.008695	0.000564269	0.00835	7.07107e-05	0.008485	0.000411193	0.008476	0.000234555	0.008705	0.000706682	0.008488	0.000239716
	90.0087		0.008805	0.00100469	0.008825	0.000876927	0.008325	0.00056745	0.008556	0.000301821	0.008543	0.000504127	0.00814	0.000553715	0.008561	0.00052731
	95.0092		0.008735	0.000580172	0.008505	0.000553534	0.008655	0.000407922	0.008565	0.000186762	0.008529	0.000518513	0.008315	0.000562672	0.008384	0.000177358
		313k
		MOLECULES/UNITCELL
	%RH	tip3p
	0		0	0	0	0	0	0	0	0	0	0	0	0	0	0
	0.00136563		1.00002	2.44949e-05	2.00002	7.74597e-05	3.00003	5.83095e-05	4.00002	2.44951e-05	4.61486	0.531129	3.64473	0.683192	4.99297	0.028295
	0.0136562		1.00015	0.000158114	2.00013	9.48683e-05	3.0002	0.00024779	4.00037	0.000187872	4.95815	0.0723941	4.00103	0.000950474	5.00071	0.000944491
	0.0682781		1.0005	0.000617576	2.00163	0.00094784	3.00177	0.00165892	4.00264	0.000695339	4.98747	0.0533745	4.00803	0.00626136	5.00263	0.000986821
	0.136549		1.00154	0.00221977	2.00238	0.00182198	3.004	0.00464683	4.00459	0.00139273	5.01389	0.00435147	4.01884	0.01213	5.00404	0.00214165
	0.273071		1.00206	0.00206412	2.00372	0.00132121	3.00561	0.00483802	4.00908	0.000733338	5.02871	0.0150655	4.03982	0.0133316	5.01032	0.00290789
	0.409566		1.00432	0.00267862	2.00768	0.00517132	3.01042	0.0108699	4.01293	0.00415628	5.04253	0.00907346	4.04014	0.0339809	5.01631	0.00572762
	0.546033		1.00537	0.00517739	2.00921	0.00649196	3.01666	0.00594067	4.01938	0.00640414	5.06093	0.0180043	4.06518	0.0494448	5.01853	0.00534518
	0.682473		1.0074	0.00535658	2.01139	0.00682588	3.01867	0.0134076	4.02219	0.0054871	5.08472	0.0260779	4.08162	0.0476091	5.02285	0.00332389
	1.36426		1.01833	0.0145385	2.0244	0.0256611	3.02439	0.0117358	4.04604	0.0075974	5.13645	0.0245316	4.10612	0.0670198	5.05289	0.0162297
	1.63679		1.02058	0.0137957	2.03102	0.0278079	3.0477	0.0219002	4.05664	0.00749095	5.17553	0.0131747	4.16134	0.0670973	5.05637	0.00674754
	5.0005		1.04846	0.0209118	2.09488	0.0362987	3.12256	0.0241741	4.15704	0.020342	5.50725	0.111681	4.37186	0.131155	5.18113	0.0338324
	10.001		1.10668	0.0166736	2.20347	0.0572236	3.22962	0.0370149	4.32568	0.0426501	5.88632	0.125526	4.80213	0.0580674	5.34506	0.036563
	15.0015		1.12614	0.0702502	2.25607	0.0494515	3.37409	0.0855407	4.47073	0.0509718	6.16246	0.177701	5.03189	0.250032	5.51011	0.0354992
	20.002		1.18192	0.057828	2.32759	0.10028	3.50232	0.171092	4.59232	0.0364933	6.35495	0.140631	5.32217	0.36215	5.63272	0.0657102
	25.0025		1.26866	0.0782675	2.4034	0.110839	3.54168	0.144479	4.72411	0.0903497	6.61698	0.128685	5.57772	0.264355	5.78936	0.121115
	30.0029		1.27748	0.0902424	2.45138	0.127824	3.6301	0.171416	4.86485	0.0688421	6.77062	0.154967	5.65582	0.24534	5.95494	0.0836329
	35.0034		1.32415	0.0395409	2.54107	0.107609	3.78509	0.10304	5.0331	0.0935133	6.97513	0.15686	5.74194	0.201109	6.12803	0.0759729
	40.0039		1.33584	0.0541148	2.60476	0.108487	3.86409	0.297161	5.14424	0.12765	7.17801	0.119669	5.89161	0.199305	6.20732	0.04858
	45.0044		1.40465	0.126796	2.74477	0.154122	3.93113	0.220396	5.19907	0.0454875	7.27206	0.157425	6.10224	0.252717	6.38007	0.16864
	50.0048		1.42274	0.0754048	2.72757	0.0983003	4.04286	0.168643	5.34509	0.120113	7.48323	0.228302	6.22654	0.553686	6.48077	0.101789
	55.0053		1.44232	0.199287	2.81522	0.0856962	4.23977	0.46796	5.47241	0.112895	7.62849	0.0831199	6.30147	0.25269	6.68536	0.0745742
	60.0057		1.44557	0.0652071	2.89637	0.0725824	4.23179	0.330645	5.51734	0.0990493	7.78535	0.186617	6.60951	0.48332	6.76122	0.0922827
	65.0062		1.52934	0.193287	2.8737	0.161233	4.32362	0.330882	5.6481	0.0774111	7.98667	0.0960054	6.52034	0.334473	6.89183	0.222039
	70.0066		1.51366	0.136778	3.04841	0.202383	4.27325	0.222583	5.75577	0.0438502	7.94883	0.0984127	6.75579	0.541148	6.9667	0.131982
	75.0071		1.56135	0.172446	3.03133	0.264925	4.53855	0.376014	5.76972	0.134618	8.16094	0.243554	6.69606	0.357725	7.13989	0.238937
	80.0075		1.57045	0.179045	2.99133	0.142212	4.65012	0.286793	5.97856	0.152423	8.30826	0.182477	6.82003	0.259657	7.27939	0.226163
	85.008		1.64321	0.0795343	3.11437	0.136115	4.697	0.419772	6.01862	0.125948	8.40577	0.213463	7.07196	0.497305	7.34549	0.038304
	90.0084		1.67383	0.155476	3.13867	0.295171	4.70018	0.24626	6.23152	0.261671	8.54749	0.175682	6.98227	0.296797	7.46211	0.161476
	95.0088		1.79453	0.217936	3.22843	0.213349	4.66918	0.272335	6.24233	0.203414	8.68018	0.0937991	7.04725	0.26251	7.67678	0.141008
	%RH	N2
	0		0.6047	0.00602321	0.602805	0.00641727	0.600585	0.0091075	0.601644	0.00504193	0.603973	0.00659875	0.60167	0.0027047	0.603856	0.0022741
	0.00136563		0.60513	0.00663795	0.59873	0.0117778	0.60912	0.00612923	0.603945	0.00526657	0.603705	0.00477262	0.603085	0.0119784	0.603626	0.00372017
	0.0136562		0.601905	0.00555836	0.60289	0.0113596	0.606895	0.00709023	0.602043	0.00176729	0.601895	0.00460506	0.60357	0.00909568	0.603863	0.0032478
	0.0682781		0.603575	0.00844233	0.60392	0.00732321	0.60785	0.010797	0.602313	0.00162139	0.602155	0.0087282	0.600725	0.00612103	0.604156	0.00435623
	0.136549		0.602885	0.00573747	0.60417	0.0104484	0.60281	0.00866779	0.601072	0.00126158	0.605175	0.00667282	0.603045	0.0111382	0.602144	0.00378131
	0.273071		0.601525	0.00641475	0.60293	0.00614503	0.600405	0.00654182	0.603839	0.00199965	0.605501	0.0055063	0.60214	0.0016934	0.604401	0.00511486
	0.409566		0.6049	0.00431382	0.603135	0.0124496	0.605955	0.00899474	0.60345	0.00173837	0.605364	0.00599507	0.602125	0.0105528	0.604227	0.0043582
	0.546033		0.5988	0.0050067	0.60392	0.00809193	0.60438	0.0112093	0.604457	0.00292267	0.602075	0.00361993	0.6067	0.0100415	0.603189	0.00276409
	0.682473		0.59997	0.00932879	0.60295	0.00657647	0.60029	0.00730524	0.605851	0.00381349	0.605318	0.00494189	0.60086	0.0144903	0.602956	0.00407956
	1.36426		0.601615	0.0119851	0.60444	0.0109764	0.600725	0.00225942	0.602802	0.00196154	0.603869	0.00370874	0.603855	0.00725447	0.602488	0.00473242
	1.63679		0.601575	0.0137455	0.60305	0.00771116	0.603715	0.00354296	0.602614	0.00270593	0.601783	0.00159019	0.605395	0.0107212	0.602865	0.00484763
	5.0005		0.603635	0.0100706	0.598585	0.0035301	0.606095	0.0119452	0.603256	0.00238649	0.601156	0.00442008	0.600305	0.00914327	0.600934	0.0034902
	10.001		0.598865	0.00743065	0.59974	0.0103144	0.598545	0.00614576	0.597165	0.00240917	0.600707	0.00400512	0.598355	0.00931002	0.598559	0.00240366
	15.0015		0.59505	0.00856283	0.59734	0.0118134	0.59216	0.0101002	0.596316	0.00386101	0.596352	0.00400623	0.598855	0.00766025	0.596291	0.00329386
	20.002		0.59197	0.00865658	0.595405	0.00945465	0.596815	0.002186	0.594531	0.00645909	0.591712	0.00317466	0.59636	0.00815902	0.594257	0.00454795
	25.0025		0.595355	0.00728336	0.59171	0.0104665	0.591155	0.00406637	0.591684	0.00168922	0.590685	0.00260071	0.59085	0.0109404	0.590747	0.00320866
	30.0029		0.59249	0.00999123	0.591395	0.00908017	0.592875	0.0115569	0.589165	0.00277719	0.586506	0.00375214	0.586195	0.00408196	0.588196	0.00261848
	35.0034		0.587545	0.00440788	0.584575	0.00827109	0.58743	0.0131669	0.58572	0.00329822	0.583701	0.00300081	0.5844	0.00852262	0.585436	0.00556838
	40.0039		0.581765	0.00850827	0.58365	0.00697775	0.58151	0.00823035	0.58316	0.00195195	0.58206	0.00416739	0.5834	0.0103319	0.582187	0.0045716
	45.0044		0.584595	0.0111438	0.580835	0.00625577	0.581025	0.01124	0.581833	0.00355888	0.580755	0.00371823	0.580035	0.00732193	0.5808	0.00408473
	50.0048		0.58014	0.00605827	0.578455	0.00388528	0.581115	0.00796383	0.579211	0.00252392	0.578766	0.00196868	0.57593	0.0125609	0.579417	0.00338861
	55.0053		0.57549	0.00743892	0.580515	0.00614529	0.577365	0.0029869	0.575671	0.00378711	0.575674	0.00279259	0.574945	0.00960913	0.57665	0.0042936
	60.0057		0.575275	0.00870488	0.57671	0.00325862	0.575305	0.00562756	0.574493	0.00382634	0.573255	0.00464046	0.573675	0.00752848	0.573568	0.00372344
	65.0062		0.57443	0.00769814	0.57526	0.0119148	0.57271	0.00836956	0.570774	0.00419853	0.568814	0.00348138	0.56674	0.0082517	0.572457	0.00481428
	70.0066		0.567355	0.0079318	0.5712	0.00923499	0.567825	0.0104471	0.568487	0.00168915	0.568999	0.00199509	0.568435	0.00638291	0.568098	0.0035727
	75.0071		0.56612	0.00852364	0.5648	0.00942804	0.566505	0.00750423	0.566923	0.00280018	0.566274	0.00363599	0.56112	0.00885395	0.566615	0.00176034
	80.0075		0.565855	0.00871696	0.56822	0.011687	0.564565	0.0075232	0.563598	0.00398208	0.562831	0.00285932	0.56445	0.0070122	0.56458	0.00236051
	85.008		0.562985	0.00630068	0.561355	0.0127488	0.56205	0.00524042	0.561658	0.00305156	0.559163	0.00225902	0.56191	0.00409397	0.561816	0.00490973
	90.0084		0.563865	0.011066	0.56219	0.00932736	0.56185	0.00874025	0.559063	0.00381038	0.557071	0.00244739	0.55668	0.00821842	0.558836	0.005304
	95.0088		0.562365	0.0103812	0.55876	0.0107274	0.56	0.00755705	0.557301	0.00411884	0.554295	0.00465753	0.557155	0.00808483	0.557589	0.00286826
	%RH	O2
	0		0.16739	0.00171248	0.1663	0.00238516	0.165205	0.00659101	0.166037	0.00290152	0.165863	0.00188805	0.166155	0.00712751	0.166375	0.00140741
	0.00136563		0.16598	0.00572603	0.16736	0.00290854	0.16586	0.00201856	0.165679	0.00281537	0.165829	0.00165769	0.16584	0.00285913	0.166282	0.0017319
	0.0136562		0.165435	0.0028696	0.167115	0.00362569	0.16816	0.00388247	0.166721	0.000883977	0.165328	0.00111295	0.16566	0.00462943	0.166717	0.00150495
	0.0682781		0.16822	0.0027888	0.16706	0.00171248	0.16578	0.00296132	0.165977	0.00179991	0.165431	0.00071393	0.165795	0.00194921	0.166599	0.00200774
	0.136549		0.16609	0.00196128	0.16548	0.00608658	0.16825	0.00654836	0.165465	0.00202294	0.165348	0.00178059	0.166295	0.00120183	0.165505	0.00153381
	0.273071		0.168225	0.00499229	0.165605	0.002696	0.165995	0.00536856	0.165885	0.000845671	0.164926	0.00103039	0.166775	0.00234542	0.166873	0.00129998
	0.409566		0.167495	0.00765306	0.165735	0.00483049	0.16604	0.00498203	0.164996	0.00195804	0.165281	0.00173808	0.16597	0.00288	0.166044	0.00150385
	0.546033		0.16805	0.00398936	0.16601	0.00257247	0.165525	0.00254539	0.166235	0.00117196	0.1652	0.00177836	0.16575	0.00366879	0.16568	0.000856831
	0.682473		0.16676	0.00659284	0.16608	0.00674221	0.168045	0.00315728	0.165994	0.0010071	0.165328	0.000737824	0.16648	0.00447721	0.166197	0.000844028
	1.36426		0.166735	0.00240927	0.165645	0.00389235	0.165475	0.00218243	0.166206	0.00224818	0.165485	0.00160861	0.1656	0.0029995	0.165845	0.0026871
	1.63679		0.16622	0.00506768	0.16558	0.00341283	0.16525	0.00177989	0.165235	0.00144142	0.164478	0.00125466	0.166635	0.00192421	0.166333	0.00211581
	5.0005		0.1659	0.00467001	0.1671	0.00150433	0.167565	0.00423091	0.165353	0.00118628	0.164215	0.00114586	0.16594	0.00383935	0.165653	0.00148678
	10.001		0.164765	0.00239637	0.16639	0.00296709	0.16471	0.00182225	0.164432	0.00168789	0.164285	0.00192906	0.164615	0.0037985	0.164351	0.00282917
	15.0015		0.16357	0.00271853	0.165235	0.00574775	0.162515	0.00450795	0.163778	0.00127327	0.163347	0.000854321	0.164065	0.00251686	0.163392	0.00157549
	20.002		0.164975	0.00350314	0.16284	0.0041365	0.163865	0.00563787	0.162817	0.000577567	0.161979	0.000909668	0.164315	0.00277085	0.16346	0.00178899
	25.0025		0.164135	0.00296709	0.163705	0.00397233	0.161275	0.00259461	0.163293	0.000988789	0.16226	0.00104096	0.16201	0.00155293	0.162792	0.0022844
	30.0029		0.16364	0.00371128	0.16281	0.0032514	0.163625	0.00493974	0.161491	0.000750584	0.160475	0.00193275	0.16223	0.00419921	0.161731	0.00163408
	35.0034		0.161815	0.00228596	0.163475	0.0028943	0.160875	0.0027366	0.160778	0.00041166	0.160015	0.000930011	0.16199	0.00194258	0.161279	0.00154882
	40.0039		0.162395	0.00279041	0.160925	0.00183385	0.161595	0.00639456	0.159722	0.00130422	0.159239	0.00170413	0.162175	0.00266721	0.160571	0.00180685
	45.0044		0.16305	0.00301944	0.16111	0.00276633	0.16144	0.00420293	0.159858	0.00176819	0.158524	0.00235156	0.158905	0.0041631	0.159854	0.00163799
	50.0048		0.160105	0.00394162	0.160995	0.00280578	0.159665	0.00572762	0.158794	0.000527917	0.158208	0.00225947	0.1588	0.00564916	0.158593	0.000954999
	55.0053		0.1601	0.00474184	0.158285	0.00475527	0.159385	0.00382957	0.158534	0.00156043	0.157433	0.000627713	0.158725	0.00144326	0.158572	0.00178835
	60.0057		0.16047	0.00457148	0.158285	0.00220014	0.15908	0.00624014	0.158284	0.00114297	0.156907	0.00168344	0.15825	0.00175983	0.158053	0.000990547
	65.0062		0.158265	0.00303341	0.15749	0.00163909	0.158865	0.00556036	0.157461	0.000727555	0.156624	0.00187253	0.156145	0.00156282	0.157508	0.00161848
	70.0066		0.159	0.0030736	0.156425	0.00312842	0.158735	0.00392512	0.156826	0.000974523	0.156095	0.0024155	0.159515	0.00509447	0.155921	0.000939668
	75.0071		0.158535	0.00533747	0.157205	0.00408318	0.155945	0.00206795	0.156009	0.00127852	0.155009	0.00218527	0.155525	0.00130499	0.155443	0.00149717
	80.0075		0.15844	0.00119524	0.15693	0.00063435	0.156265	0.00506859	0.155322	0.00174298	0.154419	0.00153161	0.15562	0.00361419	0.155141	0.000375095
	85.008		0.15466	0.00350209	0.15597	0.00456765	0.15534	0.00377208	0.155082	0.00279627	0.153365	0.00110635	0.155115	0.00684723	0.155108	0.00203486
	90.0084		0.15393	0.00165632	0.153515	0.00166601	0.15408	0.00378185	0.153944	0.00199804	0.152839	0.00134795	0.154495	0.0027809	0.153593	0.00201122
	95.0088		0.155115	0.00314111	0.15535	0.00390602	0.154465	0.00383192	0.153251	0.000805839	0.152318	0.00164355	0.1528	0.00416209	0.152701	0.0021187
	%RH	argon
	0		0.007935	0.00119942	0.007715	0.00051049	0.00778	0.000376032	0.007653	0.000292821	0.007698	0.000323456	0.00777	0.000680735	0.007757	0.000355449
	0.00136563		0.008085	0.000996293	0.007585	0.000626578	0.00774	0.000404475	0.007804	0.00041296	0.00762	0.000270037	0.007605	0.000470532	0.00768	0.000183521
	0.0136562		0.007905	0.00094414	0.00755	0.000603324	0.007895	0.000870862	0.007815	0.000314006	0.007732	0.000346329	0.00781	0.000868677	0.007637	0.00035573
	0.0682781		0.00762	0.00048518	0.00821	0.000388072	0.007875	0.00111759	0.007939	0.000324123	0.007717	0.000366366	0.007675	0.000740945	0.007655	0.000306659
	0.136549		0.00814	0.000913564	0.00776	0.000683081	0.00759	0.000626578	0.007938	0.000329217	0.007801	0.000430739	0.007415	0.000435431	0.007878	0.000340388
	0.273071		0.00769	0.000447884	0.007705	0.000285307	0.008015	0.000663777	0.008016	0.000425742	0.007894	0.000280385	0.00767	0.000773563	0.007672	0.000351886
	0.409566		0.007815	0.00107778	0.00792	0.000618385	0.00768	0.000418808	0.007806	0.00021876	0.007865	0.000286845	0.00775	0.000971597	0.007813	0.000278324
	0.546033		0.007875	0.000334664	0.008235	0.00114394	0.00769	0.000748064	0.007877	0.000321907	0.007846	0.000446918	0.007695	0.000376032	0.007807	0.000324136
	0.682473		0.007795	0.000612699	0.008055	0.000412795	0.00777	0.000860465	0.007861	0.000342894	0.007918	0.000417641	0.00761	0.00056356	0.007787	0.000416202
	1.36426		0.00769	0.000348712	0.00808	0.000701712	0.00779	0.000917932	0.007838	0.000460113	0.007812	0.00023053	0.0077	0.00116146	0.00789	0.000370135
	1.63679		0.007705	0.000836899	0.00795	0.000781665	0.007905	0.00055263	0.007854	0.000282376	0.007831	0.000628216	0.00783	0.0010027	0.007834	0.000426305
	5.0005		0.0079	0.000782304	0.007775	0.000419523	0.00755	0.000250998	0.007849	0.000495435	0.007801	0.00035267	0.007685	0.00114874	0.007739	0.00022728
	10.001		0.008075	0.000785494	0.007835	0.00129638	0.007905	0.000783199	0.007786	0.000149452	0.007742	0.000244753	0.007755	0.0014589	0.007642	0.000275797
	15.0015		0.007825	0.000522494	0.00766	0.00119105	0.00756	0.000713863	0.007737	0.000226062	0.007716	0.000312756	0.00828	0.000453211	0.00784	0.000275899
	20.002		0.00768	0.000251794	0.007355	0.000442041	0.007785	0.000724293	0.007673	0.000356236	0.00753	0.000118828	0.00776	0.000536283	0.007663	0.000335952
	25.0025		0.007395	0.0010509	0.007885	0.000780128	0.00764	0.000358608	0.007609	0.000459234	0.007608	0.0001347	0.0074	0.000460435	0.007671	0.000225335
	30.0029		0.007205	0.000215407	0.008015	0.000536283	0.007665	0.000965194	0.007725	0.000238914	0.007493	0.000412437	0.00748	0.0005995	0.007516	0.000314986
	35.0034		0.007835	0.000977548	0.007475	0.000562139	0.0076	0.00114804	0.007524	0.000124161	0.007589	0.000269474	0.007585	0.00102108	0.007514	0.000410336
	40.0039		0.00756	0.000408167	0.007535	0.00110571	0.007755	0.000988635	0.007572	0.000396313	0.007589	0.000346837	0.00743	0.000910714	0.007595	0.000239666
	45.0044		0.007465	0.000559106	0.007315	0.00141266	0.00724	0.000909175	0.007569	0.000244328	0.007539	7.22219e-05	0.00791	0.000549181	0.00736	0.000289896
	50.0048		0.00778	0.000550818	0.00738	0.000430581	0.007505	0.000845813	0.007516	0.000188404	0.00751	0.000214009	0.007345	0.00076184	0.007481	0.000531278
	55.0053		0.00751	0.00135447	0.00772	0.000476865	0.007605	0.000969742	0.007401	0.000473219	0.007382	0.000237537	0.00742	0.000631981	0.00748	0.000280428
	60.0057		0.00739	0.000623378	0.00766	0.000541849	0.00749	0.000863481	0.007479	0.0004725	0.007504	0.000235661	0.007475	0.000512835	0.007438	0.000366038
	65.0062		0.007815	0.000909725	0.007595	0.000892973	0.007515	0.00143478	0.007408	0.000269859	0.007273	0.000678605	0.00742	0.000493356	0.007387	0.000303684
	70.0066		0.007575	0.000676018	0.00752	0.00058515	0.00751	0.00114394	0.007445	0.000484892	0.007415	0.000228911	0.007585	0.000721526	0.007234	0.000225779
	75.0071		0.00766	0.000746056	0.00746	0.000630555	0.00749	0.000574108	0.007365	0.000117303	0.007326	0.000224446	0.00711	0.000337046	0.007264	0.000102255
	80.0075		0.00741	0.000461086	0.007235	0.00027313	0.007275	0.000537587	0.007392	0.000145134	0.007397	0.00039948	0.00704	0.000957392	0.00723	0.000355753
	85.008		0.00705	0.000339116	0.00717	0.0010693	0.007205	0.000566922	0.007241	0.000256546	0.007249	0.000305116	0.007365	0.00084119	0.007193	0.00038557
	90.0084		0.00724	0.000978059	0.006885	0.000518266	0.007515	0.000494571	0.007351	0.000265586	0.007161	0.000506257	0.00732	0.000185472	0.007284	0.000345219
	95.0088		0.007495	0.000835105	0.00715	0.000411096	0.007015	0.000477074	0.007259	0.000407009	0.007218	0.000265677	0.00739	0.000920652	0.007034	0.000309671

## Sheet: edge_surface
MoS2 with random defects on both edges and basal surfaces
	278k
	MOL/KG
%RH	tip3p	uptake	err +/-	uptake	err +/-	uptake	err +/-
0		0	0	0	0	0	0
0.0116767		0.110159	0.00063571	0.368523	0.000912112	0.578975	0.00453511
0.116766		0.116018	0.00195944	0.373705	0.00515274	0.600387	0.0020568
0.583806		0.123817	0.0026596	0.38017	0.00254678	0.617346	0.00431548
1.16755		0.124964	0.00203131	0.383061	0.00103801	0.623561	0.00334636
2.33487		0.126449	0.00101814	0.386037	0.0013515	0.632449	0.00384619
3.50196		0.127159	0.00178889	0.387634	0.00209701	0.638659	0.00494496
4.66881		0.128251	0.000711377	0.388512	0.00239865	0.642671	0.00426879
5.00283		0.128191	0.00114023	0.389794	0.001226	0.64427	0.00390873
5.83543		0.127988	0.00133607	0.390093	0.00146572	0.648056	0.00334643
10.0057		0.129591	0.000372876	0.394106	0.000703115	0.666648	0.0036461
11.665		0.129573	0.00106555	0.395527	0.00157373	0.672958	0.00759875
13.9952		0.13004	0.00107616	0.398054	0.00207158	0.677459	0.00238169
15.0085		0.1304	0.000816263	0.3981	0.0014128	0.681021	0.0040385
20.0113		0.131733	0.000624666	0.404779	0.00376015	0.692456	0.00533228
25.0142		0.132659	0.00130121	0.407257	0.00389623	0.702975	0.00453507
30.017		0.133943	0.00154772	0.413969	0.00488135	0.711089	0.00614443
35.0198		0.134492	0.00206454	0.420473	0.00608565	0.722004	0.00434311
40.0227		0.135723	0.000900306	0.430739	0.0110591	0.729546	0.00418948
45.0255		0.135916	0.00208962	0.442554	0.0181012	0.740801	0.00378662
50.0283		0.137269	0.00191158	0.454796	0.0419256	0.755175	0.00542021
55.0312		0.138542	0.00261673	0.485427	0.0143412	0.761369	0.0163023
60.034		0.13909	0.00178145	0.493579	0.0270152	0.764669	0.00743517
65.0368		0.140205	0.00175174	0.518882	0.00904596	0.777963	0.00694695
70.0396		0.140761	0.00166045	0.547453	0.0268175	0.810901	0.0428552
75.0425		0.140981	0.00308134	0.565986	0.0496356	0.875071	0.0623534
80.0453		0.143201	0.000393931	0.58905	0.0625098	1.07802	0.302556
85.0481		0.143012	0.00166137	0.623512	0.0435677	1.02974	0.189338
90.051		0.144643	0.00234172	0.653787	0.038397	1.45367	0.180892
95.0538		0.146956	0.00667311	0.708679	0.136036	1.60052	0.0748685
%RH	N2
0		0.0202725	0.000138975	0.0191827	8.21456e-05	0.0192851	0.000111309
0.0116767		0.0204168	6.43875e-05	0.0202125	5.20414e-05	0.0199998	6.71749e-05
0.116766		0.0203743	0.00016978	0.0202231	4.87167e-05	0.0200715	2.0867e-05
0.583806		0.0204052	0.000113059	0.0202642	5.62869e-05	0.0201419	7.52092e-05
1.16755		0.0203925	0.000184128	0.020285	4.24419e-05	0.0200507	5.09258e-05
2.33487		0.0203933	0.000127333	0.0202669	9.5788e-05	0.020032	9.13298e-05
3.50196		0.0204225	0.00012929	0.020231	0.000117106	0.0199021	0.000106634
4.66881		0.020449	2.89133e-05	0.0201876	2.942e-05	0.0198155	9.74624e-05
5.00283		0.0204134	8.66822e-05	0.020174	4.17066e-05	0.0197802	9.50811e-05
5.83543		0.0204084	4.24482e-05	0.0201682	8.74607e-05	0.019729	6.23804e-05
10.0057		0.0203459	8.85551e-05	0.0200723	6.12495e-05	0.0193695	7.90116e-05
11.665		0.0203229	0.000103324	0.0199922	7.2654e-05	0.0192012	0.000106912
13.9952		0.0202666	8.71978e-05	0.0199376	7.53959e-05	0.0191058	6.79551e-05
15.0085		0.0203396	0.000111127	0.0199794	9.76977e-05	0.0190707	6.28817e-05
20.0113		0.0202182	0.000105596	0.0198057	6.55222e-05	0.0187768	5.60989e-05
25.0142		0.0201545	8.99094e-05	0.0197142	8.32998e-05	0.0185834	0.000100608
30.017		0.0201154	6.40784e-05	0.0195239	8.60473e-05	0.0183639	0.000124961
35.0198		0.020088	7.67829e-05	0.0194745	0.000157605	0.0181478	7.26315e-05
40.0227		0.0200389	0.000106218	0.0192935	0.000272429	0.0180196	2.70902e-05
45.0255		0.0199824	0.00011631	0.0190771	0.000333292	0.017733	7.5504e-05
50.0283		0.0199434	8.97133e-05	0.0188662	0.000748805	0.0175246	0.000186638
55.0312		0.0198569	0.00013149	0.018386	0.000128648	0.017458	0.000172446
60.034		0.0198812	0.000150185	0.0181977	0.000473208	0.017319	3.70267e-05
65.0368		0.019785	0.000122699	0.0177178	0.000157194	0.0170496	0.000113712
70.0396		0.0197575	5.57439e-05	0.0173157	0.000396641	0.0164737	0.000636212
75.0425		0.0198027	0.000164274	0.0170565	0.000634818	0.0152831	0.00102927
80.0453		0.0196667	0.000145598	0.0165477	0.00130652	0.0115855	0.0056007
85.0481		0.0196674	0.000139343	0.0160595	0.000735798	0.0125487	0.00338002
90.051		0.0196105	6.3765e-05	0.0155371	0.000713778	0.00455646	0.00389812
95.0538		0.0195112	0.000206772	0.0144252	0.00288579	0.00213981	0.00174281
%RH	O2
0		0.00524531	3.49442e-05	0.00490686	4.47228e-05	0.0048925	4.53893e-05
0.0116767		0.00527034	2.88216e-05	0.00511125	4.27503e-05	0.00502497	2.68496e-05
0.116766		0.00527034	3.03539e-05	0.00509827	2.79158e-05	0.00502666	1.68295e-05
0.583806		0.00526793	2.41805e-05	0.00509643	1.90518e-05	0.00500546	1.45881e-05
1.16755		0.00526946	2.11269e-05	0.00510699	3.88285e-05	0.00500226	2.41496e-05
2.33487		0.0052719	4.40013e-05	0.00510389	1.27413e-05	0.00497653	2.0495e-05
3.50196		0.00526082	3.18151e-05	0.00509041	2.9396e-05	0.00495102	2.71691e-05
4.66881		0.00526462	2.51748e-05	0.00509055	2.35581e-05	0.00494238	2.80922e-05
5.00283		0.00526278	1.45315e-05	0.00508796	4.5453e-05	0.00493413	2.19087e-05
5.83543		0.00525133	3.75098e-05	0.0050775	2.62308e-05	0.00491304	1.85361e-05
10.0057		0.00524245	3.7906e-05	0.00504692	9.4159e-06	0.00482827	2.47829e-05
11.665		0.00523892	3.36742e-05	0.00504614	2.2553e-05	0.00479432	3.44608e-05
13.9952		0.00521981	2.51034e-05	0.00501491	2.0366e-05	0.00476688	2.12227e-05
15.0085		0.00524941	1.77628e-05	0.00502806	1.74068e-05	0.00476581	2.2812e-05
20.0113		0.00522464	3.42945e-05	0.00497583	3.28028e-05	0.00469027	3.22475e-05
25.0142		0.00518359	4.09652e-05	0.00494986	3.61336e-05	0.00463293	1.59361e-05
30.017		0.00518568	3.21427e-05	0.00493266	3.03655e-05	0.00458943	2.94854e-05
35.0198		0.00516857	3.91552e-05	0.0049006	2.54865e-05	0.00454075	3.45364e-05
40.0227		0.00517082	3.29967e-05	0.00487241	5.49328e-05	0.00450526	3.47737e-05
45.0255		0.00515773	4.17164e-05	0.00481722	9.35757e-05	0.00442961	1.91545e-05
50.0283		0.00513717	5.46139e-05	0.00477821	0.000162886	0.00438919	4.29935e-05
55.0312		0.00513538	5.62219e-05	0.0046691	2.74899e-05	0.00436985	4.3178e-05
60.034		0.00513141	3.74979e-05	0.0046126	0.000122176	0.00434729	3.46829e-05
65.0368		0.0051057	3.12064e-05	0.00450769	6.04641e-05	0.00427761	2.22993e-05
70.0396		0.00508861	3.33499e-05	0.00439195	9.80915e-05	0.00414339	0.000134441
75.0425		0.00509652	4.32644e-05	0.00434167	0.000151257	0.00387591	0.000229956
80.0453		0.00508231	2.33438e-05	0.00422145	0.000295589	0.00297836	0.00135436
85.0481		0.00507595	3.48776e-05	0.00411334	0.000152474	0.00322026	0.000853453
90.051		0.00506366	3.12796e-05	0.00398205	0.000161031	0.0012482	0.000971551
95.0538		0.00505758	5.46728e-05	0.00370172	0.00070306	0.000636695	0.000437673
%RH	argon
0		0.000279241	9.3452e-06	0.000256496	9.0434e-06	0.000255414	9.2525e-06
0.0116767		0.000277573	8.3427e-06	0.000270312	5.6408e-06	0.000265666	7.2486e-06
0.116766		0.000277965	5.2656e-06	0.000271388	7.2985e-06	0.00026447	3.7384e-06
0.583806		0.000279369	6.8403e-06	0.000268005	7.7191e-06	0.000264145	6.736e-06
1.16755		0.000276716	3.5886e-06	0.00026886	3.8995e-06	0.00026472	5.4484e-06
2.33487		0.000276898	7.0376e-06	0.000268676	6.4521e-06	0.00026257	5.5614e-06
3.50196		0.000277837	5.9213e-06	0.000269945	4.1719e-06	0.000260688	5.3201e-06
4.66881		0.000277144	8.7502e-06	0.000268557	6.4787e-06	0.00026067	4.3364e-06
5.00283		0.000277928	7.0583e-06	0.000271057	3.014e-06	0.000259872	6.1862e-06
5.83543		0.000278785	6.6802e-06	0.000267977	9.5621e-06	0.000257991	3.873e-06
10.0057		0.000275585	6.0207e-06	0.000264889	4.1828e-06	0.000255368	3.5597e-06
11.665		0.000276187	5.5137e-06	0.000268557	5.7589e-06	0.000254746	3.8382e-06
13.9952		0.000277627	4.8885e-06	0.000265973	2.0329e-06	0.000251308	3.0746e-06
15.0085		0.000275786	5.2441e-06	0.00026658	5.4967e-06	0.000250501	5.875e-06
20.0113		0.000276005	7.1015e-06	0.000265477	5.0359e-06	0.000248657	9.071e-07
25.0142		0.000276223	6.3298e-06	0.00026043	2.8512e-06	0.000246525	7.2758e-06
30.017		0.000275576	7.2551e-06	0.000259355	6.9278e-06	0.000246617	5.156e-06
35.0198		0.00027626	5.8452e-06	0.000258831	3.2074e-06	0.000240157	6.9346e-06
40.0227		0.000274391	4.4763e-06	0.000254694	4.5655e-06	0.000240064	4.7109e-06
45.0255		0.000273488	5.675e-06	0.000255245	6.6586e-06	0.000235606	5.4187e-06
50.0283		0.000273287	1.9736e-06	0.000255466	1.185e-05	0.000233353	1.16831e-05
55.0312		0.000271646	4.0955e-06	0.000246329	7.7077e-06	0.000232547	6.926e-06
60.034		0.000273242	6.2422e-06	0.00024313	1.06941e-05	0.000229228	7.5402e-06
65.0368		0.000272166	6.9222e-06	0.000238735	6.8381e-06	0.000226003	6.577e-06
70.0396		0.00026872	5.7729e-06	0.000233643	7.1991e-06	0.00021893	1.34008e-05
75.0425		0.000271163	9.6586e-06	0.000233054	1.22723e-05	0.000204192	1.20142e-05
80.0453		0.00026944	3.5007e-06	0.000224808	1.65343e-05	0.000159338	7.2522e-05
85.0481		0.000269394	5.2996e-06	0.000219651	1.12645e-05	0.000170341	4.06845e-05
90.051		0.000268537	3.698e-06	0.000214522	1.28182e-05	6.70537e-05	5.39341e-05
95.0538		0.000266231	8.2349e-06	0.000196991	3.64337e-05	3.37956e-05	2.41497e-05
	298k
	MOL/KG
%RH	tip3p
0		0	0	0	0	0	0
0.00318445		0.109542	0.000103637	0.367758	0.000386224	0.556268	0.00169755
0.0318442		0.110372	0.000471607	0.368924	0.00101809	0.582406	0.00750972
0.159215		0.116013	0.00366089	0.372318	0.00193192	0.599032	0.00277724
0.318414		0.118448	0.00249485	0.375144	0.00198321	0.605987	0.00410579
0.636764		0.120746	0.00426312	0.379235	0.00180541	0.611673	0.00403365
0.95505		0.123325	0.00189757	0.380318	0.00311403	0.617818	0.00259972
1.27327		0.123328	0.0046829	0.381913	0.00256984	0.621571	0.00278422
1.59143		0.124328	0.0018172	0.382795	0.00227362	0.624253	0.00426317
3.18127		0.126046	0.00295761	0.386231	0.00318199	0.633585	0.00312857
3.81676		0.125956	0.00189745	0.388007	0.00117131	0.639176	0.000973433
5.0005		0.127496	0.00123071	0.38898	0.00134305	0.642306	0.00343985
10.001		0.128901	0.0021708	0.395081	0.00119816	0.663732	0.00511196
15.0015		0.131005	0.000552011	0.398155	0.000920843	0.677827	0.00350093
20.002		0.131742	0.00121506	0.403843	0.00187512	0.690365	0.00734527
25.0025		0.132647	0.00138881	0.411173	0.00481924	0.705496	0.00553407
30.003		0.134405	0.000937618	0.417732	0.00454156	0.714534	0.00802545
35.0035		0.13516	0.00153503	0.425241	0.00326226	0.722411	0.00725367
40.004		0.137344	0.00189671	0.439798	0.02147	0.731669	0.00414843
45.0044		0.137437	0.00149341	0.450285	0.0181622	0.743329	0.00503939
50.0049		0.138291	0.00171728	0.454499	0.0174432	0.755612	0.00641516
55.0054		0.139732	0.00184141	0.478508	0.0113519	0.771989	0.0165353
60.0059		0.14089	0.0015013	0.522269	0.0335721	0.780434	0.0154071
65.0064		0.142535	0.00164776	0.527892	0.0396473	0.793415	0.0227024
70.0068		0.143679	0.00108021	0.56455	0.0324128	0.843163	0.0824208
75.0073		0.145328	0.00418239	0.570486	0.0276193	0.871157	0.0869366
80.0078		0.144547	0.000595505	0.608656	0.0517554	0.962444	0.0567381
85.0083		0.147438	0.00162006	0.620139	0.0317205	1.18939	0.281453
90.0087		0.149018	0.00571132	0.690872	0.048789	1.40244	0.181332
95.0092		0.148461	0.00206349	0.751117	0.177526	1.55641	0.0405392
%RH	N2
0		0.0143152	0.000101358	0.0135495	4.3887e-05	0.0136643	7.99058e-05
0.00318445		0.0144068	0.000119193	0.0142586	5.74987e-05	0.0141257	2.28354e-05
0.0318442		0.014396	4.50041e-05	0.0142627	8.44221e-05	0.0141378	7.79566e-05
0.159215		0.0144166	4.03971e-05	0.0142917	6.40359e-05	0.0141748	6.12233e-05
0.318414		0.0144687	8.88174e-05	0.0142672	2.78137e-05	0.0141775	3.41731e-05
0.636764		0.0144412	5.21291e-05	0.0142984	6.08042e-05	0.0141775	3.61325e-05
0.95505		0.0144657	5.69036e-05	0.0143231	5.61659e-05	0.0141881	4.77504e-05
1.27327		0.0144669	6.03143e-05	0.0143025	5.02007e-05	0.0141535	4.8726e-05
1.59143		0.0144354	7.18055e-05	0.0143164	7.74322e-05	0.0141524	4.89511e-05
3.18127		0.0144435	2.15285e-05	0.0143041	5.04014e-05	0.0140856	9.04871e-05
3.81676		0.0144301	2.64421e-05	0.0142667	3.42128e-05	0.0140222	6.25075e-05
5.0005		0.0143969	2.78401e-05	0.0142365	2.23766e-05	0.0139553	8.7648e-05
10.001		0.0143858	9.01197e-05	0.0141171	7.43297e-05	0.0136016	6.05718e-05
15.0015		0.0143393	8.57031e-05	0.014035	6.58802e-05	0.0133543	4.53497e-05
20.002		0.0142927	8.09913e-05	0.0139466	6.69631e-05	0.013162	0.000102821
25.0025		0.0141948	5.76156e-05	0.0137951	6.68044e-05	0.012935	0.000109733
30.003		0.0141446	0.000106456	0.0136823	8.90274e-05	0.012755	0.000110087
35.0035		0.0140924	9.92537e-05	0.0135633	3.68954e-05	0.0126312	6.56973e-05
40.004		0.014021	0.000106806	0.0133055	0.000280244	0.0124593	0.000112622
45.0044		0.01402	7.96113e-05	0.0131906	0.000199692	0.0122498	8.70588e-05
50.0049		0.0139757	6.87396e-05	0.0131031	0.0002412	0.0120918	9.01832e-05
55.0054		0.0138853	0.000170483	0.0128377	0.000169413	0.0118629	0.000222701
60.0059		0.0138399	0.000102447	0.0122371	0.000400656	0.0116864	0.000212602
65.0064		0.0138179	6.12889e-05	0.0121108	0.000530968	0.0115185	0.000304288
70.0068		0.0137441	0.000122566	0.0116401	0.0004428	0.0108491	0.0010787
75.0073		0.0137062	0.000134621	0.0115676	0.000284011	0.0104552	0.00109133
80.0078		0.013684	8.60187e-05	0.0110774	0.000778043	0.00926306	0.000846291
85.0083		0.0135914	0.000120638	0.0109004	0.000452824	0.00633229	0.00366476
90.0087		0.0134978	0.000149909	0.00989877	0.000669467	0.00358771	0.00242788
95.0092		0.0135288	4.46066e-05	0.00909051	0.00256652	0.00150443	0.000571867
%RH	O2
0		0.00372809	5.70048e-05	0.00350984	1.62236e-05	0.00349842	2.19673e-05
0.00318445		0.00374565	3.23311e-05	0.003636	1.71747e-05	0.00359615	1.49832e-05
0.0318442		0.00374483	7.2316e-06	0.00364821	3.82787e-05	0.00358642	1.95956e-05
0.159215		0.00373263	3.7776e-06	0.00363359	1.63052e-05	0.00358035	2.46069e-05
0.318414		0.00374832	3.50474e-05	0.00364386	1.09909e-05	0.00358197	2.10056e-05
0.636764		0.00373671	2.11734e-05	0.0036464	2.21673e-05	0.00356661	2.60143e-05
0.95505		0.00374389	2.42571e-05	0.00363671	1.92626e-05	0.00357198	2.30822e-05
1.27327		0.00374803	1.14066e-05	0.00363124	3.7202e-05	0.00356803	9.57e-06
1.59143		0.00373583	3.59528e-05	0.00363163	2.77147e-05	0.00356428	1.85016e-05
3.18127		0.00373304	3.60004e-05	0.00362224	6.434e-06	0.00354777	2.13207e-05
3.81676		0.00372888	3.24784e-05	0.00362655	1.10891e-05	0.00351765	2.98962e-05
5.0005		0.00373904	1.81133e-05	0.00361682	4.7314e-06	0.00350274	1.98047e-05
10.001		0.00372501	2.2705e-05	0.0035878	1.24641e-05	0.00343371	2.02364e-05
15.0015		0.00370282	2.50665e-05	0.00356078	2.85485e-05	0.00337265	1.57166e-05
20.002		0.00369105	2.55594e-05	0.00353711	3.12342e-05	0.00333214	2.39797e-05
25.0025		0.003681	2.71227e-05	0.00350933	5.98359e-05	0.00326025	2.34208e-05
30.003		0.00366825	2.15483e-05	0.00348397	3.5296e-05	0.00323768	1.86356e-05
35.0035		0.00364843	3.47803e-05	0.00345348	1.84069e-05	0.00320046	3.29346e-05
40.004		0.00363846	9.4087e-06	0.00338986	6.81345e-05	0.00315558	2.14373e-05
45.0044		0.00364412	3.72559e-05	0.00336413	7.17523e-05	0.00309969	3.02308e-05
50.0049		0.00361738	3.79625e-05	0.00334852	4.35756e-05	0.00307429	4.64225e-05
55.0054		0.00360142	4.13871e-05	0.00327858	3.82372e-05	0.00300231	4.43499e-05
60.0059		0.00359487	2.55253e-05	0.0031342	9.57433e-05	0.0029799	5.16117e-05
65.0064		0.0035706	2.27909e-05	0.00310969	0.000115511	0.00294048	7.06557e-05
70.0068		0.00357602	2.97814e-05	0.00300087	0.000101614	0.0027773	0.000262459
75.0073		0.0035499	3.46818e-05	0.00298107	6.51788e-05	0.00266775	0.000257427
80.0078		0.00355037	7.7353e-06	0.00285543	0.000190472	0.00238827	0.000199341
85.0083		0.00353725	1.5837e-05	0.00281526	9.55218e-05	0.0016718	0.000911117
90.0087		0.00351399	2.90774e-05	0.00256576	0.000168328	0.00098202	0.000609606
95.0092		0.00351052	2.33267e-05	0.00236752	0.000642006	0.000457863	0.000146295
%RH	argon
0		0.000193956	3.2326e-06	0.000182586	2.9535e-06	0.000182465	5.2624e-06
0.00318445		0.000195032	4.8559e-06	0.000190666	3.6002e-06	0.000184467	4.3439e-06
0.0318442		0.000196035	5.825e-06	0.00019165	4.5771e-06	0.000185496	3.8342e-06
0.159215		0.000195917	5.1823e-06	0.000192413	3.9716e-06	0.000188592	4.5343e-06
0.318414		0.00019598	4.0974e-06	0.000193452	3.2116e-06	0.000186256	4.7284e-06
0.636764		0.000195041	1.9662e-06	0.000191825	5.8316e-06	0.000187146	6.4797e-06
0.95505		0.000198561	3.5949e-06	0.000189425	4.6926e-06	0.000184745	3.0129e-06
1.27327		0.000197676	2.1378e-06	0.000189527	8.7609e-06	0.000185978	6.6269e-06
1.59143		0.000197385	4.2104e-06	0.000189977	4.4679e-06	0.000185116	1.00105e-05
3.18127		0.000194139	4.0911e-06	0.000191338	7.559e-06	0.000185644	3.1941e-06
3.81676		0.000197293	7.1576e-06	0.000188745	4.4452e-06	0.000184958	5.9909e-06
5.0005		0.000197877	3.7195e-06	0.000191218	6.6682e-06	0.000182493	4.0359e-06
10.001		0.000196245	3.2206e-06	0.00018869	2.8018e-06	0.000178368	4.2398e-06
15.0015		0.000192598	5.0176e-06	0.000186962	5.917e-06	0.000173817	5.0398e-06
20.002		0.00019371	6.2879e-06	0.000185215	5.4906e-06	0.000174021	5.4345e-06
25.0025		0.000194038	4.7794e-06	0.000186934	4.5717e-06	0.000169655	7.9893e-06
30.003		0.000193418	7.6357e-06	0.000185031	4.7049e-06	0.00016997	7.9297e-06
35.0035		0.000194759	6.011e-06	0.000181014	4.6101e-06	0.000164872	3.7177e-06
40.004		0.000192224	5.1675e-06	0.000178688	6.279e-06	0.000167022	6.6262e-06
45.0044		0.000195005	5.1572e-06	0.000176381	5.5831e-06	0.0001621	3.9052e-06
50.0049		0.000192315	9.538e-07	0.000176556	3.6296e-06	0.000161971	4.6676e-06
55.0054		0.00018896	6.3726e-06	0.00017389	8.4091e-06	0.000158634	5.6393e-06
60.0059		0.000190327	4.0373e-06	0.000162243	1.00307e-05	0.000157049	3.2817e-06
65.0064		0.000187674	3.915e-06	0.000163392	7.927e-06	0.000153536	5.46e-06
70.0068		0.000189088	3.156e-06	0.000158703	9.6508e-06	0.000145712	1.25278e-05
75.0073		0.000186954	6.1959e-06	0.000156396	8.3034e-06	0.000140244	9.1449e-06
80.0078		0.000186845	7.2323e-06	0.000150513	1.12512e-05	0.000127341	8.7498e-06
85.0083		0.000184711	4.45e-06	0.000148417	8.1578e-06	8.8308e-05	4.79073e-05
90.0087		0.000186744	6.7011e-06	0.000134168	8.7446e-06	5.25566e-05	3.51847e-05
95.0092		0.000182231	2.5946e-06	0.000125839	3.45268e-05	2.35902e-05	7.9989e-06
	313k
	MOL/KG
%RH	tip3p
0		0	0	0	0	0	0
0.00136563		0.109443	2.33674e-05	0.365948	0.00133571	0.537435	0.00404585
0.0136562		0.109759	0.000443154	0.36786	0.000307268	0.563348	0.00357807
0.0682781		0.110678	0.000670306	0.369687	0.000929634	0.585354	0.00607137
0.136549		0.113726	0.0023294	0.371201	0.00175896	0.591084	0.00332324
0.273071		0.115994	0.00295196	0.373556	0.00150431	0.597784	0.00675288
0.409566		0.118535	0.00231715	0.374598	0.00149594	0.603215	0.00324403
0.546033		0.118683	0.00108902	0.376363	0.00212068	0.607966	0.00221073
0.682473		0.121142	0.00317776	0.378696	0.00292488	0.610216	0.00382797
1.36426		0.124076	0.00420229	0.381883	0.00122734	0.618153	0.0026215
1.63679		0.123725	0.000799001	0.381254	0.0019389	0.622551	0.00238282
5.0005		0.126889	0.00160386	0.388236	0.00310595	0.641158	0.0046756
10.001		0.12954	0.00150381	0.395064	0.00213535	0.660785	0.00456994
15.0015		0.130647	0.00101864	0.401086	0.00101671	0.676869	0.00218163
20.002		0.131809	0.000720986	0.406042	0.0011001	0.69071	0.00411364
25.0025		0.133351	0.00129603	0.412173	0.0026987	0.702151	0.00339007
30.0029		0.134835	0.00134342	0.420077	0.00394582	0.713244	0.00495712
35.0034		0.135831	0.00147994	0.429127	0.00646358	0.723609	0.004059
40.0039		0.137543	0.00181594	0.451976	0.0151449	0.735266	0.00390245
45.0044		0.138232	0.000494571	0.454449	0.0121014	0.744652	0.00640232
50.0048		0.140981	0.00116924	0.472464	0.0154058	0.757775	0.0108178
55.0053		0.140906	0.00150819	0.494621	0.0184463	0.776111	0.0138127
60.0057		0.142049	0.00299815	0.506014	0.0164605	0.793073	0.0117473
65.0062		0.144657	0.00298582	0.535146	0.016269	0.816642	0.0235399
70.0066		0.145213	0.00163746	0.569334	0.0222377	0.851438	0.0229157
75.0071		0.14594	0.0029225	0.597564	0.0465771	0.912372	0.0592205
80.0075		0.146556	0.00142943	0.623261	0.0398326	1.04986	0.123803
85.008		0.14971	0.0027281	0.657663	0.0261489	1.19463	0.0682703
90.0084		0.152086	0.00635437	0.697722	0.0895754	1.35795	0.162833
95.0088		0.151224	0.00251989	0.745739	0.0403816	1.46629	0.131913
%RH	N2
0		0.0112972	9.13588e-05	0.0108053	5.46458e-05	0.0107888	4.83199e-05
0.00136563		0.0113555	5.38996e-05	0.0112768	2.97281e-05	0.0111121	3.60736e-05
0.0136562		0.0113618	8.09446e-05	0.0112794	5.70239e-05	0.0111722	6.6502e-05
0.0682781		0.0113728	6.49529e-05	0.0112896	2.57041e-05	0.0111863	4.67571e-05
0.136549		0.0113745	3.46388e-05	0.0113032	4.20467e-05	0.0111643	4.44741e-05
0.273071		0.011362	4.81229e-05	0.0113159	9.44161e-05	0.0111851	3.81119e-05
0.409566		0.011387	3.81567e-05	0.01131	8.50153e-05	0.011189	5.64466e-05
0.546033		0.0113623	4.39749e-05	0.0113137	3.63471e-05	0.0111828	5.10077e-05
0.682473		0.0113964	8.54741e-05	0.0113215	3.5657e-05	0.0111937	2.64026e-05
1.36426		0.0113866	6.63614e-05	0.0113172	1.51744e-05	0.0111707	3.98139e-05
1.63679		0.0113802	5.16395e-05	0.0112963	3.69963e-05	0.0111607	3.84407e-05
5.0005		0.011345	0.000104355	0.0112108	4.09976e-05	0.0109688	6.82545e-05
10.001		0.0112976	6.08242e-05	0.0110866	3.69505e-05	0.0106995	6.09873e-05
15.0015		0.0112413	9.82438e-05	0.0109849	4.54201e-05	0.0104639	4.90107e-05
20.002		0.0111563	9.7132e-05	0.0108734	5.37453e-05	0.0102696	7.67167e-05
25.0025		0.0110857	7.43577e-05	0.0107677	5.87713e-05	0.0100747	7.07729e-05
30.0029		0.0110231	5.90106e-05	0.0106419	5.57459e-05	0.00989485	6.92361e-05
35.0034		0.0109416	3.67712e-05	0.0104984	7.36593e-05	0.0097542	3.33045e-05
40.0039		0.0108865	5.19752e-05	0.0102304	0.000169874	0.00959052	5.79206e-05
45.0044		0.0108509	8.25671e-05	0.0101531	0.000123437	0.00945698	7.32987e-05
50.0048		0.0107385	5.85451e-05	0.00993229	0.000130769	0.00926854	9.26223e-05
55.0053		0.0106914	8.57685e-05	0.00967505	0.000188457	0.00905229	0.000121443
60.0057		0.0106263	8.2374e-05	0.00949157	0.000175598	0.00882841	0.000133176
65.0062		0.010547	0.000114956	0.00916873	0.000215518	0.00851709	0.000220532
70.0066		0.0104858	1.7496e-05	0.00876071	0.000194309	0.00816039	0.000189344
75.0071		0.0104269	0.000102999	0.00844366	0.000457064	0.00747832	0.000537436
80.0075		0.0103839	6.99222e-05	0.00819278	0.00045308	0.00608259	0.00129446
85.008		0.0102766	8.21121e-05	0.0077575	0.00030772	0.00455603	0.0006748
90.0084		0.0102252	0.000122147	0.00732796	0.000983585	0.00288666	0.00168017
95.0088		0.010174	4.81886e-05	0.00677105	0.000508076	0.00184138	0.00130336
%RH	O2
0		0.00295524	1.87628e-05	0.00279457	2.08733e-05	0.00279197	2.54904e-05
0.00136563		0.00297242	2.40987e-05	0.00289702	2.44194e-05	0.00283915	1.89567e-05
0.0136562		0.00297815	3.43973e-05	0.00289334	2.73368e-05	0.00285744	9.6559e-06
0.0682781		0.00296786	2.42048e-05	0.00289555	1.54557e-05	0.00285145	1.08679e-05
0.136549		0.00296963	1.99593e-05	0.0028883	2.15228e-05	0.00283879	2.27119e-05
0.273071		0.00296532	2.25557e-05	0.00289956	1.26204e-05	0.00285231	2.12627e-05
0.409566		0.00296568	2.57958e-05	0.00289184	2.07644e-05	0.00284111	2.20324e-05
0.546033		0.00297537	1.82665e-05	0.00289904	1.60507e-05	0.00283746	2.61942e-05
0.682473		0.00296812	2.19855e-05	0.00289584	2.54521e-05	0.00284271	2.6998e-05
1.36426		0.00297031	2.70633e-05	0.00288828	1.44672e-05	0.0028335	2.07908e-05
1.63679		0.00297226	1.69695e-05	0.00289864	2.98171e-05	0.00282943	1.4126e-05
5.0005		0.00295748	2.60061e-05	0.0028639	2.89872e-05	0.00277723	1.53947e-05
10.001		0.00293278	2.26601e-05	0.00283759	2.67715e-05	0.00272	1.37683e-05
15.0015		0.00293258	2.2421e-05	0.00282284	1.78979e-05	0.00266297	1.33686e-05
20.002		0.0029058	1.59142e-05	0.00279593	1.34808e-05	0.00261345	8.7364e-06
25.0025		0.00289907	1.83658e-05	0.00275471	8.8961e-06	0.00256585	1.1202e-05
30.0029		0.00286306	2.03681e-05	0.00272741	2.4508e-05	0.00252676	1.66745e-05
35.0034		0.00284724	1.51749e-05	0.00269511	2.92426e-05	0.00249628	2.35914e-05
40.0039		0.00284185	2.15574e-05	0.00262227	4.30154e-05	0.00244587	2.39636e-05
45.0044		0.00283105	1.65407e-05	0.00260707	3.85652e-05	0.00241557	2.27221e-05
50.0048		0.00279777	1.55311e-05	0.00255916	1.9897e-05	0.00237783	2.77112e-05
55.0053		0.00279528	1.56708e-05	0.00249217	4.95703e-05	0.00231784	4.17592e-05
60.0057		0.00277554	2.3982e-05	0.00244828	4.113e-05	0.00225332	3.39276e-05
65.0062		0.00275085	2.20613e-05	0.00237329	3.59462e-05	0.00219444	5.86983e-05
70.0066		0.00274501	2.17703e-05	0.00227678	6.38559e-05	0.00209784	4.39598e-05
75.0071		0.0027262	3.58138e-05	0.00219773	0.000112403	0.00193616	0.000131313
80.0075		0.00271618	1.85499e-05	0.0021265	0.00011565	0.00159299	0.000314187
85.008		0.0026882	3.15987e-05	0.00202765	7.7265e-05	0.0012227	0.000177267
90.0084		0.0026681	3.94629e-05	0.00191886	0.000252755	0.000796265	0.000429101
95.0088		0.00265861	6.1306e-06	0.00177167	0.000145722	0.000529338	0.000324709
%RH	argon
0		0.000155481	1.8655e-06	0.000144712	2.8332e-06	0.000142227	5.3945e-06
0.00136563		0.00015301	5.3097e-06	0.000150752	3.3472e-06	0.000146815	5.4939e-06
0.0136562		0.000156046	8.5613e-06	0.000148104	4.1322e-06	0.000147881	3.3356e-06
0.0682781		0.000155544	4.7316e-06	0.000147884	4.7121e-06	0.000146769	4.7804e-06
0.136549		0.000155171	1.737e-06	0.000149713	4.528e-06	0.000148215	3.236e-06
0.273071		0.000155326	4.8309e-06	0.00015009	3.0236e-06	0.000149161	6.5822e-06
0.409566		0.00015518	5.917e-06	0.000150733	3.6227e-06	0.00014929	3.3664e-06
0.546033		0.000155079	5.2804e-06	0.000149529	2.3569e-06	0.000148345	1.1021e-06
0.682473		0.000155079	1.7589e-06	0.000150825	8.2314e-06	0.000147928	4.9402e-06
1.36426		0.000155763	6.8921e-06	0.000152443	6.7866e-06	0.000147566	5.6071e-06
1.63679		0.000154231	1.4796e-06	0.000152232	7.7306e-06	0.000148577	6.1447e-06
5.0005		0.000153739	2.2113e-06	0.000149134	2.5173e-06	0.000144433	4.7542e-06
10.001		0.000155006	1.6895e-06	0.00014713	6.0303e-06	0.000142941	1.4087e-06
15.0015		0.000152381	4.8526e-06	0.000144786	2.3859e-06	0.000137129	4.082e-06
20.002		0.000150913	4.033e-06	0.000145429	5.5935e-06	0.000136443	4.538e-06
25.0025		0.000151879	2.4947e-06	0.000142671	5.2747e-06	0.000133523	2.9818e-06
30.0029		0.000149809	3.0618e-06	0.000142717	1.4418e-06	0.000134534	1.8991e-06
35.0034		0.000149673	5.5269e-06	0.000142138	4.877e-06	0.000129482	5.1186e-06
40.0039		0.000147348	3.3985e-06	0.000136622	3.9499e-06	0.00012748	4.4764e-06
45.0044		0.000147621	4.4924e-06	0.000134572	4.6503e-06	0.000125709	4.8639e-06
50.0048		0.000146363	5.5817e-06	0.000134398	3.5508e-06	0.000127183	3.9706e-06
55.0053		0.000144959	1.5995e-06	0.000129314	2.2379e-06	0.00012088	4.5347e-06
60.0057		0.00014588	3.208e-06	0.000128993	6.0702e-06	0.000119935	3.4951e-06
65.0062		0.000143345	6.0149e-06	0.000122953	5.6414e-06	0.000117784	3.942e-06
70.0066		0.000143199	3.2632e-06	0.000120177	4.2073e-06	0.00011061	4.1737e-06
75.0071		0.000141522	9.7678e-06	0.000114422	5.0148e-06	0.00010122	7.5953e-06
80.0075		0.000141175	3.447e-06	0.00011103	1.06614e-05	8.37846e-05	1.45573e-05
85.008		0.000141485	6.0634e-06	0.000105027	4.8288e-06	6.32996e-05	7.2082e-06
90.0084		0.000140601	4.1178e-06	0.00010067	1.41339e-05	4.10071e-05	2.50946e-05
95.0088		0.000138896	3.6799e-06	9.27823e-05	7.1879e-06	2.86419e-05	1.64329e-05
	278k
	MOLECULES/UNITCELL
%RH	tip3p
0		0	0	0	0	0	0
0.0116767		6.0411	0.0348621	20.0442	0.0496105	31.231	0.244632
0.116766		6.36239	0.107455	20.3261	0.280261	32.386	0.110948
0.583806		6.79008	0.145851	20.6778	0.138521	33.3008	0.232785
1.16755		6.85297	0.111396	20.835	0.0564583	33.636	0.180509
2.33487		6.93444	0.0558343	20.9969	0.073509	34.1155	0.20747
3.50196		6.97334	0.098102	21.0837	0.114058	34.4505	0.26674
4.66881		7.03322	0.0390117	21.1314	0.130465	34.6669	0.230267
5.00283		7.02994	0.0625298	21.2012	0.0666834	34.7531	0.210844
5.83543		7.0188	0.0732694	21.2175	0.0797214	34.9574	0.180513
10.0057		7.10673	0.0204484	21.4358	0.038243	35.9603	0.196677
11.665		7.10575	0.0584345	21.513	0.0855962	36.3006	0.409891
13.9952		7.13135	0.059016	21.6505	0.112675	36.5434	0.128473
15.0085		7.15111	0.0447636	21.653	0.0768431	36.7356	0.217844
20.0113		7.2242	0.0342565	22.0162	0.204517	37.3524	0.287633
25.0142		7.27497	0.0713578	22.151	0.211919	37.9198	0.24463
30.017		7.34539	0.0848766	22.5161	0.2655	38.3575	0.331442
35.0198		7.37549	0.113219	22.8699	0.331003	38.9462	0.234276
40.0227		7.44299	0.0493725	23.4282	0.601515	39.3531	0.225988
45.0255		7.45359	0.114594	24.0709	0.984537	39.9602	0.204257
50.0283		7.52778	0.104831	24.7367	2.28036	40.7356	0.292376
55.0312		7.59761	0.143501	26.4028	0.78003	41.0697	0.879377
60.034		7.62763	0.0976941	26.8462	1.46938	41.2477	0.401067
65.0368		7.68879	0.096065	28.2224	0.492017	41.9648	0.374731
70.0396		7.71931	0.0910584	29.7764	1.45862	43.7415	2.31169
75.0425		7.73137	0.16898	30.7844	2.69972	47.2029	3.36346
80.0453		7.8531	0.021603	32.0389	3.39995	58.1502	16.3204
85.0481		7.84272	0.0911092	33.9133	2.36968	55.5462	10.2133
90.051		7.93216	0.128419	35.56	2.08844	78.4137	9.75767
95.0538		8.05899	0.365951	38.5456	7.39913	86.3351	4.03855
%RH	N2
0		1.11174	0.00762136	1.04336	0.00446796	1.04027	0.0060042
0.0116767		1.11965	0.00353099	1.09937	0.00283057	1.07883	0.00362354
0.116766		1.11732	0.00931069	1.09995	0.00264974	1.08269	0.0011256
0.583806		1.11901	0.00620014	1.10219	0.00306149	1.08649	0.00405693
1.16755		1.11832	0.0100975	1.10332	0.00230845	1.08157	0.00274703
2.33487		1.11836	0.00698288	1.10233	0.00520998	1.08057	0.0049265
3.50196		1.11997	0.00709023	1.10038	0.00636948	1.07356	0.00575204
4.66881		1.12142	0.0015856	1.09802	0.00160018	1.06889	0.00525731
5.00283		1.11946	0.00475363	1.09728	0.00226846	1.06698	0.00512885
5.83543		1.11919	0.00232785	1.09696	0.00475705	1.06422	0.00336492
10.0057		1.11576	0.00485633	1.09175	0.00333141	1.04483	0.00426203
11.665		1.1145	0.00566627	1.08739	0.00395171	1.03575	0.00576702
13.9952		1.11141	0.0047819	1.08442	0.00410084	1.0306	0.00366562
15.0085		1.11542	0.00609415	1.0867	0.00531385	1.02871	0.00339196
20.0113		1.10876	0.00579086	1.07725	0.0035638	1.01286	0.00302608
25.0142		1.10526	0.0049306	1.07227	0.00453074	1.00243	0.00542696
30.017		1.10312	0.00351404	1.06192	0.00468018	0.990585	0.0067406
35.0198		1.10162	0.00421075	1.05923	0.00857225	0.978924	0.00391788
40.0227		1.09893	0.00582498	1.04939	0.0148176	0.97201	0.00146129
45.0255		1.09583	0.00637839	1.03762	0.018128	0.956549	0.00407283
50.0283		1.09369	0.00491985	1.02615	0.0407281	0.94531	0.0100676
55.0312		1.08895	0.00721085	1.00003	0.00699727	0.941716	0.00930204
60.034		1.09028	0.00823608	0.989788	0.0257381	0.934217	0.00199729
65.0368		1.085	0.00672879	0.963688	0.00854991	0.919687	0.00613384
70.0396		1.0835	0.00305698	0.941816	0.0215736	0.888621	0.0343184
75.0425		1.08597	0.00900873	0.927714	0.0345282	0.824401	0.055521
80.0453		1.07852	0.00798453	0.900041	0.0710629	0.624943	0.302112
85.0481		1.07855	0.00764152	0.873489	0.0400206	0.676899	0.182324
90.051		1.07543	0.00349685	0.845078	0.038823	0.245784	0.210272
95.0538		1.06999	0.0113393	0.784596	0.15696	0.115426	0.0940106
%RH	O2
0		0.287651	0.00191633	0.266888	0.00243251	0.26391	0.00244838
0.0116767		0.289024	0.00158057	0.278005	0.00232522	0.271056	0.00144831
0.116766		0.289024	0.0016646	0.277299	0.00151836	0.271147	0.000907816
0.583806		0.288892	0.00132605	0.277199	0.00103624	0.270004	0.000786909
1.16755		0.288975	0.00115859	0.277773	0.00211191	0.269832	0.00130268
2.33487		0.28911	0.00241302	0.277604	0.000693011	0.268444	0.00110554
3.50196		0.288502	0.00174473	0.276871	0.00159887	0.267068	0.00146555
4.66881		0.28871	0.00138058	0.276879	0.00128135	0.266601	0.00151534
5.00283		0.288609	0.000796904	0.276738	0.00247222	0.266156	0.0011818
5.83543		0.287982	0.00205703	0.276169	0.00142671	0.265018	0.000999873
10.0057		0.287494	0.00207876	0.274506	0.000512139	0.260446	0.00133683
11.665		0.287301	0.00184668	0.274464	0.00122667	0.258615	0.00185888
13.9952		0.286253	0.00137666	0.272765	0.00110772	0.257134	0.00114479
15.0085		0.287876	0.000974108	0.27348	0.000946768	0.257076	0.00123052
20.0113		0.286517	0.0018807	0.270639	0.00178417	0.253002	0.00173949
25.0142		0.284266	0.00224652	0.269226	0.00196534	0.249909	0.000859625
30.017		0.284381	0.00176269	0.268291	0.0016516	0.247562	0.0015905
35.0198		0.283442	0.00214726	0.266547	0.00138623	0.244937	0.00186296
40.0227		0.283566	0.00180953	0.265014	0.00298784	0.243022	0.00187576
45.0255		0.282849	0.00228771	0.262012	0.00508966	0.238942	0.00103323
50.0283		0.281721	0.00299501	0.259891	0.00885948	0.236761	0.00231915
55.0312		0.281622	0.00308319	0.253956	0.0014952	0.235718	0.0023291
60.034		0.281405	0.00205638	0.250883	0.00664524	0.234501	0.00187086
65.0368		0.279995	0.00171135	0.245176	0.00328869	0.230742	0.00120287
70.0396		0.279058	0.0018289	0.238881	0.00533527	0.223502	0.00725197
75.0425		0.279492	0.00237261	0.236147	0.00822699	0.209074	0.0124043
80.0453		0.278712	0.00128017	0.229608	0.0160773	0.160659	0.0730566
85.0481		0.278363	0.00191268	0.223727	0.00829315	0.173707	0.0460369
90.051		0.277689	0.00171536	0.216587	0.00875858	0.06733	0.0524073
95.0538		0.277356	0.00299824	0.20134	0.03824	0.0343445	0.0236089
%RH	argon
0		0.0153135	0.00051249	0.013951	0.00049188	0.0137775	0.000499099
0.0116767		0.015222	0.000457508	0.0147025	0.000306806	0.0143305	0.000391004
0.116766		0.0152435	0.000288766	0.014761	0.000396971	0.014266	0.000201658
0.583806		0.0153205	0.000375119	0.014577	0.00041985	0.0142485	0.000363354
1.16755		0.015175	0.000196799	0.0146235	0.000212099	0.0142795	0.000293895
2.33487		0.015185	0.00038594	0.0146135	0.000350936	0.0141635	0.000299993
3.50196		0.0152365	0.000324724	0.0146825	0.000226914	0.014062	0.000286974
4.66881		0.0151985	0.00047986	0.014607	0.000352383	0.014061	0.000233915
5.00283		0.0152415	0.000387074	0.014743	0.000163933	0.014018	0.000333697
5.83543		0.0152885	0.000366341	0.0145755	0.00052009	0.0139165	0.000208916
10.0057		0.015113	0.000330173	0.0144075	0.000227508	0.013775	0.000192016
11.665		0.015146	0.000302367	0.014607	0.000313231	0.0137415	0.000207041
13.9952		0.015225	0.000268086	0.0144665	0.000110571	0.013556	0.000165849
15.0085		0.015124	0.000287587	0.0144995	0.000298972	0.0135125	0.000316907
20.0113		0.015136	0.000389443	0.0144395	0.000273905	0.013413	4.89285e-05
25.0142		0.015148	0.000347123	0.014165	0.000155081	0.013298	0.000392472
30.017		0.0151125	0.000397869	0.0141065	0.00037681	0.013303	0.000278126
35.0198		0.01515	0.000320546	0.014078	0.000174453	0.0129545	0.000374064
40.0227		0.0150475	0.000245479	0.013853	0.000248322	0.0129495	0.000254114
45.0255		0.014998	0.000311214	0.013883	0.000362166	0.012709	0.000292294
50.0283		0.014987	0.000108231	0.013895	0.000644531	0.0125875	0.000630206
55.0312		0.014897	0.000224597	0.013398	0.00041923	0.012544	0.000373599
60.034		0.0149845	0.000342321	0.013224	0.000581658	0.012365	0.000406731
65.0368		0.0149255	0.00037961	0.012985	0.000371927	0.012191	0.000354776
70.0396		0.0147365	0.000316585	0.012708	0.000391566	0.0118095	0.000722865
75.0425		0.0148705	0.000529673	0.012676	0.0006675	0.0110145	0.000648069
80.0453		0.014776	0.000191979	0.0122275	0.000899311	0.008595	0.00391197
85.0481		0.0147735	0.00029063	0.011947	0.000612686	0.0091885	0.0021946
90.051		0.0147265	0.000202796	0.011668	0.00069719	0.003617	0.0029093
95.0538		0.0146	0.000451597	0.0107145	0.00198165	0.001823	0.00130268
	298k
	MOLECULES/UNITCELL
%RH	tip3p
0		0	0	0	0	0	0
0.00318445		6.00728	0.00568341	20.0026	0.021007	30.0061	0.0915688
0.0318442		6.05278	0.0258628	20.0661	0.0553746	31.4161	0.405088
0.159215		6.36213	0.200762	20.2507	0.105079	32.3129	0.149809
0.318414		6.49565	0.136817	20.4044	0.107869	32.6881	0.221474
0.636764		6.62168	0.233788	20.6269	0.0981977	32.9948	0.217583
0.95505		6.76311	0.104062	20.6858	0.169375	33.3263	0.140234
1.27327		6.76325	0.256808	20.7725	0.139776	33.5287	0.150186
1.59143		6.8181	0.0996549	20.8205	0.123664	33.6734	0.229964
3.18127		6.91232	0.162194	21.0074	0.173071	34.1768	0.168761
3.81676		6.90738	0.104056	21.104	0.0637084	34.4784	0.0525088
5.0005		6.99184	0.0674917	21.1569	0.0730496	34.6472	0.185552
10.001		7.06891	0.119046	21.4888	0.065169	35.803	0.275748
15.0015		7.18426	0.0302721	21.656	0.0500854	36.5632	0.188847
20.002		7.22469	0.0666334	21.9653	0.101989	37.2396	0.396218
25.0025		7.27433	0.076162	22.364	0.262122	38.0558	0.298518
30.003		7.37072	0.0514187	22.7208	0.247019	38.5433	0.432908
35.0035		7.41216	0.0841806	23.1292	0.177437	38.9682	0.391277
40.004		7.53192	0.104015	23.921	1.16777	39.4676	0.223774
45.0044		7.53698	0.0818979	24.4914	0.987856	40.0965	0.271834
50.0049		7.58382	0.0941753	24.7205	0.948747	40.7591	0.346046
55.0054		7.66287	0.100982	26.0264	0.617439	41.6425	0.891945
60.0059		7.72637	0.0823309	28.4066	1.82601	42.0981	0.831088
65.0064		7.81659	0.0903628	28.7125	2.15645	42.7983	1.22461
70.0068		7.87933	0.0592382	30.7063	1.76295	45.4818	4.44593
75.0073		7.96976	0.229361	31.0292	1.50224	46.9918	4.68952
80.0078		7.92689	0.0326573	33.1053	2.81501	51.916	3.06056
85.0083		8.08544	0.0888438	33.7298	1.7253	64.1582	15.1821
90.0087		8.17209	0.313207	37.5771	2.65367	75.6505	9.7814
95.0092		8.14156	0.113161	40.8538	9.6558	83.9558	2.18676
%RH	N2
0		0.785041	0.00555846	0.736969	0.00238705	0.737076	0.00431027
0.00318445		0.790064	0.00653649	0.775539	0.0031274	0.761964	0.00123178
0.0318442		0.789473	0.00246801	0.775759	0.00459179	0.762618	0.00420512
0.159215		0.790604	0.00221537	0.777338	0.00348296	0.764616	0.0033025
0.318414		0.793458	0.00487072	0.776007	0.00151281	0.764759	0.00184336
0.636764		0.791949	0.00285875	0.7777	0.00330719	0.764763	0.00194906
0.95505		0.793295	0.00312057	0.779045	0.0030549	0.765331	0.00257575
1.27327		0.793359	0.00330762	0.777922	0.00273045	0.763466	0.00262837
1.59143		0.791633	0.00393779	0.778681	0.0042116	0.763406	0.00264051
3.18127		0.792079	0.00118062	0.778011	0.00274137	0.759805	0.00488104
3.81676		0.791342	0.00145008	0.775977	0.00186086	0.756385	0.00337177
5.0005		0.789521	0.00152674	0.774333	0.00121708	0.752776	0.0047279
10.001		0.78891	0.00494213	0.767842	0.00404285	0.733698	0.00326735
15.0015		0.786364	0.00469993	0.763376	0.00358327	0.720357	0.00244625
20.002		0.78381	0.00444154	0.758566	0.00364218	0.709981	0.00554633
25.0025		0.778437	0.00315962	0.750324	0.00363354	0.69774	0.00591919
30.003		0.775688	0.00583799	0.744192	0.00484227	0.68803	0.00593831
35.0035		0.772821	0.00544304	0.73772	0.00200677	0.681353	0.00354383
40.004		0.768908	0.00585723	0.723698	0.0152427	0.672079	0.00607506
45.0044		0.768852	0.00436586	0.717447	0.0108614	0.660778	0.00469611
50.0049		0.766424	0.00376966	0.712688	0.013119	0.652253	0.00486465
55.0054		0.761467	0.00934922	0.69825	0.00921453	0.639909	0.0120129
60.0059		0.758975	0.00561819	0.665586	0.021792	0.630387	0.0114682
65.0064		0.757772	0.00336106	0.658718	0.0288798	0.621331	0.0164138
70.0068		0.753722	0.00672149	0.633112	0.0240843	0.585222	0.0581874
75.0073		0.751641	0.00738258	0.629173	0.0154476	0.563971	0.0588682
80.0078		0.750425	0.00471724	0.602506	0.0423184	0.499667	0.0456505
85.0083		0.745348	0.00661576	0.592882	0.0246294	0.341575	0.197684
90.0087		0.740213	0.00822097	0.538401	0.0364128	0.193527	0.130964
95.0092		0.741914	0.00244621	0.49444	0.139595	0.081152	0.0308476
%RH	O2
0		0.204448	0.00312613	0.190903	0.000882414	0.188712	0.00118496
0.00318445		0.20541	0.00177303	0.197765	0.000934147	0.193983	0.000808223
0.0318442		0.205366	0.000396578	0.198429	0.00208201	0.193458	0.00105702
0.159215		0.204696	0.000207162	0.197633	0.000886852	0.193131	0.00132734
0.318414		0.205557	0.00192199	0.198192	0.000597804	0.193218	0.00113308
0.636764		0.20492	0.00116114	0.19833	0.0012057	0.192389	0.00140326
0.95505		0.205314	0.00133025	0.197803	0.00104771	0.19268	0.0012451
1.27327		0.20554	0.000625535	0.197506	0.00202344	0.192466	0.000516223
1.59143		0.204872	0.00197164	0.197527	0.00150743	0.192264	0.000998011
3.18127		0.204718	0.00197425	0.197017	0.000349951	0.191374	0.00115008
3.81676		0.20449	0.0017811	0.197251	0.000603147	0.189748	0.00161266
5.0005		0.205048	0.00099333	0.196721	0.000257344	0.188944	0.0010683
10.001		0.204279	0.00124513	0.195143	0.000677934	0.185221	0.00109159
15.0015		0.203062	0.00137464	0.193673	0.00155277	0.181927	0.000847782
20.002		0.202416	0.00140167	0.192386	0.00169885	0.179742	0.00129351
25.0025		0.201865	0.0014874	0.190875	0.00325452	0.175864	0.00126336
30.003		0.201165	0.0011817	0.189496	0.00191978	0.174647	0.00100524
35.0035		0.200078	0.00190734	0.187837	0.00100116	0.172639	0.00177655
40.004		0.199532	0.000515969	0.184377	0.00370589	0.170218	0.00115637
45.0044		0.199843	0.0020431	0.182977	0.00390266	0.167203	0.0016307
50.0049		0.198376	0.00208185	0.182128	0.00237011	0.165833	0.00250412
55.0054		0.1975	0.00226966	0.178324	0.00207975	0.16195	0.00239232
60.0059		0.197141	0.0013998	0.170471	0.00520755	0.160742	0.00278403
65.0064		0.19581	0.00124985	0.169138	0.00628276	0.158615	0.0038113
70.0068		0.196108	0.0016332	0.163219	0.00552689	0.149812	0.0141575
75.0073		0.194676	0.00190194	0.162142	0.00354512	0.143903	0.0138861
80.0078		0.194701	0.0004242	0.155309	0.0103599	0.128828	0.0107528
85.0083		0.193982	0.000868496	0.153124	0.0051955	0.09018	0.0491474
90.0087		0.192706	0.00159459	0.139553	0.00915548	0.052972	0.0328833
95.0092		0.192516	0.00127923	0.128772	0.0349192	0.024698	0.00789142
%RH	argon
0		0.0106365	0.000177274	0.009931	0.000160642	0.0098425	0.000283866
0.00318445		0.0106955	0.000266297	0.0103705	0.000195816	0.0099505	0.000234316
0.0318442		0.0107505	0.000319443	0.010424	0.00024895	0.010006	0.000206824
0.159215		0.010744	0.000284194	0.0104655	0.000216019	0.010173	0.000244589
0.318414		0.0107475	0.0002247	0.010522	0.000174683	0.010047	0.000255057
0.636764		0.010696	0.000107824	0.0104335	0.000317184	0.010095	0.000349528
0.95505		0.010889	0.000197145	0.010303	0.000255233	0.0099655	0.000162524
1.27327		0.0108405	0.000117235	0.0103085	0.000476514	0.010032	0.000357469
1.59143		0.0108245	0.000230898	0.010333	0.00024301	0.0099855	0.000539985
3.18127		0.0106465	0.000224357	0.010407	0.000411137	0.010014	0.000172296
3.81676		0.0108195	0.000392523	0.010266	0.000241777	0.009977	0.000323163
5.0005		0.0108515	0.000203975	0.0104005	0.00036269	0.009844	0.000217706
10.001		0.010762	0.000176618	0.010263	0.000152394	0.0096215	0.000228705
15.0015		0.010562	0.000275162	0.010169	0.000321832	0.009376	0.000271857
20.002		0.010623	0.000344825	0.010074	0.00029864	0.009387	0.000293145
25.0025		0.010641	0.000262099	0.0101675	0.000248656	0.0091515	0.000430959
30.003		0.010607	0.000418741	0.010064	0.000255902	0.0091685	0.000427745
35.0035		0.0106805	0.000329642	0.0098455	0.000250747	0.0088935	0.000200539
40.004		0.0105415	0.000283383	0.009719	0.00034152	0.0090095	0.000357427
45.0044		0.010694	0.000282818	0.0095935	0.000303671	0.008744	0.000210656
50.0049		0.0105465	5.23068e-05	0.009603	0.000197418	0.008737	0.000251782
55.0054		0.0103625	0.000349471	0.009458	0.000457377	0.008557	0.000304194
60.0059		0.0104375	0.000221405	0.0088245	0.000545577	0.0084715	0.00017702
65.0064		0.010292	0.000214695	0.008887	0.000431154	0.008282	0.000294523
70.0068		0.0103695	0.000173072	0.008632	0.000524913	0.00786	0.000675774
75.0073		0.0102525	0.000339779	0.0085065	0.000451626	0.007565	0.000493295
80.0078		0.0102465	0.000396618	0.0081865	0.000611961	0.006869	0.000471981
85.0083		0.0101295	0.000244037	0.0080725	0.000443712	0.0047635	0.00258421
90.0087		0.010241	0.000367486	0.0072975	0.000475626	0.002835	0.00189793
95.0092		0.0099935	0.000142288	0.0068445	0.00187794	0.0012725	0.000431474
	313k
	MOLECULES/UNITCELL
%RH	tip3p
0		0	0	0	0	0	0
0.00136563		6.00183	0.00128146	19.9042	0.0726503	28.9902	0.218241
0.0136562		6.01917	0.0243024	20.0082	0.0167125	30.3881	0.193008
0.0682781		6.06957	0.0367594	20.1076	0.0505635	31.5751	0.327501
0.136549		6.23671	0.127744	20.1899	0.095671	31.8842	0.179262
0.273071		6.36105	0.161885	20.318	0.0818206	32.2456	0.364263
0.409566		6.50041	0.127072	20.3747	0.0813654	32.5385	0.174989
0.546033		6.50856	0.0597213	20.4707	0.115345	32.7948	0.119251
0.682473		6.64337	0.174267	20.5976	0.159086	32.9162	0.206488
1.36426		6.80427	0.230452	20.7709	0.0667562	33.3443	0.141409
1.63679		6.78503	0.043817	20.7367	0.105458	33.5815	0.128534
5.0005		6.95855	0.0879553	21.1165	0.168935	34.5853	0.25221
10.001		7.10391	0.0824684	21.4879	0.116143	35.644	0.246511
15.0015		7.16463	0.055862	21.8154	0.0552999	36.5116	0.117681
20.002		7.22835	0.0395386	22.0849	0.0598352	37.2582	0.221898
25.0025		7.31294	0.0710736	22.4184	0.146784	37.8753	0.182866
30.0029		7.3943	0.0736726	22.8483	0.214616	38.4737	0.267397
35.0034		7.44891	0.0811596	23.3406	0.351559	39.0328	0.21895
40.0039		7.5428	0.0995856	24.5833	0.823742	39.6616	0.210505
45.0044		7.5806	0.0271221	24.7178	0.658205	40.1679	0.345353
50.0048		7.73134	0.064121	25.6977	0.837933	40.8758	0.583532
55.0053		7.72726	0.0827085	26.9028	1.00331	41.8649	0.745082
60.0057		7.78991	0.164418	27.5225	0.895298	42.7798	0.63367
65.0062		7.93296	0.163741	29.107	0.884884	44.0512	1.26979
70.0066		7.96341	0.0897978	30.9665	1.20952	45.9282	1.23612
75.0071		8.00329	0.160269	32.5019	2.53337	49.215	3.19446
80.0075		8.03709	0.0783894	33.8996	2.16653	56.6314	6.67815
85.008		8.21007	0.149608	35.7708	1.42226	64.4404	3.68263
90.0084		8.34037	0.348472	37.9496	4.87208	73.2505	8.78354
95.0088		8.29305	0.13819	40.5613	2.19639	79.0942	7.11563
%RH	N2
0		0.619534	0.00501009	0.587708	0.00297223	0.58197	0.00260647
0.00136563		0.62273	0.00295584	0.613353	0.00161694	0.599406	0.00194588
0.0136562		0.623079	0.00443897	0.613495	0.00310158	0.602649	0.00358724
0.0682781		0.623678	0.003562	0.61405	0.00139806	0.60341	0.00252216
0.136549		0.623775	0.00189958	0.614788	0.00228695	0.602222	0.00239902
0.273071		0.623089	0.00263904	0.61548	0.00513536	0.603344	0.00205582
0.409566		0.624459	0.0020925	0.615159	0.00462405	0.603554	0.00304484
0.546033		0.623104	0.00241157	0.615359	0.00197695	0.603219	0.00275145
0.682473		0.624974	0.00468737	0.615785	0.00193941	0.603811	0.00142421
1.36426		0.624436	0.00363924	0.615552	0.000825345	0.602568	0.00214764
1.63679		0.624089	0.0028319	0.614413	0.00201226	0.602031	0.00207356
5.0005		0.622154	0.00572278	0.609765	0.00222989	0.591679	0.00368178
10.001		0.619557	0.00333558	0.603008	0.00200976	0.57715	0.00328977
15.0015		0.616467	0.00538766	0.597475	0.00247044	0.564445	0.00264373
20.002		0.61181	0.00532669	0.591414	0.00292325	0.55396	0.00413824
25.0025		0.607934	0.00407775	0.585665	0.00319662	0.54345	0.00381762
30.0029		0.604503	0.00323612	0.578823	0.00303206	0.533747	0.00373473
35.0034		0.600036	0.00201652	0.571017	0.00400639	0.52616	0.0017965
40.0039		0.597012	0.0028503	0.55644	0.00923959	0.517331	0.00312435
45.0044		0.595059	0.00452795	0.552234	0.00671381	0.510127	0.00395387
50.0048		0.588898	0.0032106	0.540225	0.00711263	0.499962	0.00499622
55.0053		0.586315	0.00470352	0.526234	0.0102503	0.488297	0.00655087
60.0057		0.582742	0.00451736	0.516254	0.00955089	0.476221	0.00718375
65.0062		0.578391	0.00630414	0.498694	0.0117222	0.459427	0.0118959
70.0066		0.57504	0.000959474	0.476502	0.0105686	0.440186	0.0102135
75.0071		0.571809	0.00564844	0.459257	0.0248601	0.403394	0.0289903
80.0075		0.569447	0.00383451	0.445611	0.0246434	0.328107	0.0698255
85.008		0.563566	0.004503	0.421936	0.0167371	0.245761	0.0364
90.0084		0.560744	0.0066985	0.398574	0.053498	0.155712	0.0906317
95.0088		0.557936	0.00264265	0.368283	0.0276346	0.0993275	0.0703057
%RH	O2
0		0.162065	0.00102895	0.151999	0.00113532	0.150604	0.001375
0.00136563		0.163006	0.00132157	0.157571	0.00132819	0.153149	0.00102256
0.0136562		0.163321	0.00188634	0.157371	0.00148687	0.154136	0.000520859
0.0682781		0.162756	0.00132738	0.157491	0.000840646	0.153812	0.000586234
0.136549		0.162854	0.00109456	0.157097	0.00117064	0.15313	0.00122512
0.273071		0.162617	0.00123695	0.15771	0.000686436	0.153859	0.00114695
0.409566		0.162637	0.00141464	0.157289	0.00112939	0.153254	0.00118847
0.546033		0.163168	0.00100173	0.157681	0.00087301	0.153058	0.00141297
0.682473		0.162771	0.00120568	0.157507	0.00138436	0.153341	0.00145632
1.36426		0.162891	0.00148414	0.157096	0.000786884	0.152844	0.0011215
1.63679		0.162998	0.000930604	0.157659	0.00162177	0.152624	0.00076198
5.0005		0.162187	0.00142617	0.15577	0.00157663	0.149809	0.000830419
10.001		0.160832	0.00124267	0.154338	0.00145612	0.146722	0.000742687
15.0015		0.160822	0.00122956	0.153536	0.000973481	0.143646	0.000721127
20.002		0.159353	0.000872728	0.152073	0.000733229	0.140975	0.000471258
25.0025		0.158984	0.00100718	0.149831	0.000483866	0.138407	0.000604255
30.0029		0.157009	0.00111698	0.148346	0.00133301	0.136298	0.000899452
35.0034		0.156141	0.000832188	0.146589	0.00159053	0.134654	0.00127257
40.0039		0.155846	0.0011822	0.142627	0.00233964	0.131935	0.00129264
45.0044		0.155254	0.000907087	0.1418	0.00209759	0.130301	0.00122567
50.0048		0.153429	0.000851719	0.139194	0.00108221	0.128265	0.00149479
55.0053		0.153292	0.00085938	0.135551	0.00269617	0.125028	0.00225257
60.0057		0.152209	0.00131517	0.133164	0.00223709	0.121549	0.00183012
65.0062		0.150856	0.00120984	0.129085	0.00195514	0.118372	0.0031663
70.0066		0.150535	0.00119388	0.123836	0.00347317	0.113161	0.00237128
75.0071		0.149504	0.00196402	0.119537	0.00611368	0.10444	0.00708327
80.0075		0.148954	0.00101727	0.115662	0.00629029	0.085929	0.0169478
85.008		0.14742	0.00173286	0.110285	0.0042025	0.0659545	0.00956209
90.0084		0.146317	0.00216413	0.104369	0.0137475	0.042952	0.0231465
95.0088		0.145797	0.000336199	0.0963625	0.00792595	0.0285535	0.0175154
%RH	argon
0		0.0085265	0.000102303	0.007871	0.000154097	0.007672	0.000290988
0.00136563		0.008391	0.00029118	0.0081995	0.000182055	0.0079195	0.000296351
0.0136562		0.0085575	0.0004695	0.0080555	0.000224753	0.007977	0.000179928
0.0682781		0.00853	0.00025948	0.0080435	0.000256293	0.007917	0.000257864
0.136549		0.0085095	9.52575e-05	0.008143	0.00024628	0.007995	0.000174557
0.273071		0.008518	0.000264923	0.0081635	0.000164457	0.008046	0.000355058
0.409566		0.00851	0.000324484	0.0081985	0.000197043	0.008053	0.000181587
0.546033		0.0085045	0.000289576	0.008133	0.000128195	0.008002	5.94475e-05
0.682473		0.0085045	9.64572e-05	0.0082035	0.000447712	0.0079795	0.000266484
1.36426		0.008542	0.00037796	0.0082915	0.000369129	0.00796	0.000302457
1.63679		0.008458	8.11419e-05	0.00828	0.000420476	0.0080145	0.000331457
5.0005		0.008431	0.000121268	0.0081115	0.000136916	0.007791	0.000256449
10.001		0.0085005	9.26499e-05	0.0080025	0.000327994	0.0077105	7.59868e-05
15.0015		0.0083565	0.000266113	0.007875	0.000129769	0.007397	0.000220191
20.002		0.008276	0.00022117	0.00791	0.000304237	0.00736	0.000244786
25.0025		0.008329	0.000136806	0.00776	0.000286897	0.0072025	0.000160842
30.0029		0.0082155	0.000167911	0.0077625	7.84219e-05	0.007257	0.00010244
35.0034		0.008208	0.000303091	0.007731	0.000265266	0.0069845	0.000276105
40.0039		0.0080805	0.000186371	0.007431	0.000214839	0.0068765	0.000241466
45.0044		0.0080955	0.000246362	0.0073195	0.000252931	0.006781	0.000262366
50.0048		0.0080265	0.000306098	0.00731	0.000193132	0.0068605	0.000214182
55.0053		0.0079495	8.77154e-05	0.0070335	0.000121721	0.0065205	0.00024461
60.0057		0.008	0.000175926	0.007016	0.000330161	0.0064695	0.000188531
65.0062		0.007861	0.000329857	0.0066875	0.000306839	0.0063535	0.000212641
70.0066		0.007853	0.000178952	0.0065365	0.000228836	0.0059665	0.000225136
75.0071		0.007761	0.000535664	0.0062235	0.000272756	0.00546	0.000409707
80.0075		0.007742	0.000189034	0.006039	0.000579884	0.0045195	0.000785248
85.008		0.007759	0.000332515	0.0057125	0.00026264	0.0034145	0.000388824
90.0084		0.0077105	0.000225819	0.0054755	0.000768755	0.002212	0.00135365
95.0088		0.007617	0.000201802	0.0050465	0.000390955	0.001545	0.00088642

## Sheet: edges
MoS2 with edge defects
		278k	0 defects		2 defects		5 defects		10 defects		20 defects
		MOL/KG
	%RH	tip3p	uptake	err +/-	uptake	err +/-	uptake	err +/-	uptake	err +/-	uptake	err +/-
	0		0	0	0	0	0	0	0	0	0	0
	0.0116767		1.998e-07	1.684e-07	0.0189938	0.000523015	0.055977	0.000381492	0.101649	0.00306308	0.102452	0.00265278
	0.116766		1.6254e-06	3.783e-07	0.0254416	0.00113995	0.0656488	0.00126979	0.123644	0.00632432	0.122307	0.00172419
	0.583806		7.682e-06	1.4223e-06	0.0312183	0.00258219	0.0818627	0.00463953	0.144855	0.00379229	0.148112	0.0060387
	1.16755		1.51187e-05	2.8408e-06	0.0340363	0.00197342	0.0864775	0.00211338	0.15432	0.00390252	0.157778	0.0027337
	2.33487		3.12272e-05	2.1018e-06	0.0368437	0.00203526	0.0929432	0.00220969	0.162253	0.00452606	0.163263	0.00197477
	3.50196		4.60009e-05	3.2997e-06	0.0383734	0.000809703	0.0946246	0.00246462	0.167527	0.00609797	0.167927	0.00658077
	4.66881		6.12014e-05	4.8004e-06	0.039792	0.000804304	0.0974122	0.00301049	0.171492	0.00195381	0.171606	0.00421422
	5.00283		6.8393e-05	1.9139e-06	0.0394085	0.00283429	0.0982498	0.00162893	0.172887	0.00668416	0.17293	0.00526712
	5.83543		8.01974e-05	7.4158e-06	0.0411054	0.000401832	0.0993423	0.0019425	0.176196	0.00486496	0.176875	0.00425369
	10.0057		0.000136514	8.8208e-06	0.0440263	0.00110139	0.106003	0.00179721	0.184933	0.00530896	0.183239	0.0051502
	11.665		0.000153476	5.9932e-06	0.0451165	0.00140564	0.109075	0.00230706	0.189803	0.00424449	0.186084	0.00593498
	13.9952		0.000195617	3.20895e-05	0.0472876	0.00180995	0.110804	0.00187541	0.19393	0.00472668	0.189571	0.00199465
	15.0085		0.000201329	1.60533e-05	0.0466222	0.00161464	0.112389	0.0024641	0.195644	0.00686528	0.194464	0.00646776
	20.0113		0.000276578	2.20864e-05	0.0495812	0.000824616	0.119708	0.00361403	0.201988	0.00468032	0.203299	0.00363498
	25.0142		0.000356439	5.54861e-05	0.0521836	0.000618989	0.123362	0.00251455	0.210151	0.00367882	0.209778	0.00776956
	30.017		0.000412546	1.8705e-05	0.0537008	0.00131277	0.128625	0.00123915	0.216645	0.004166	0.218042	0.00560184
	35.0198		0.000500998	3.54949e-05	0.055676	0.00251431	0.133469	0.00335407	0.221048	0.00781172	0.224981	0.00873467
	40.0227		0.0005695	2.95197e-05	0.0586764	0.00168674	0.138453	0.003105	0.231829	0.00298938	0.233161	0.0063432
	45.0255		0.000648462	4.80639e-05	0.0609542	0.00153331	0.142047	0.00352502	0.238166	0.00700521	0.237538	0.00881731
	50.0283		0.000773571	0.000123213	0.0611394	0.00113779	0.146676	0.00333909	0.243771	0.00518793	0.243972	0.00823042
	55.0312		0.000852297	7.14547e-05	0.0637048	0.00138534	0.152162	0.00568711	0.25136	0.00483874	0.248827	0.00236005
	60.034		0.000908441	5.37982e-05	0.0643293	0.00128758	0.154823	0.00600507	0.260889	0.0077892	0.255176	0.0101834
	65.0368		0.00098763	0.000104298	0.0670148	0.00213761	0.157688	0.00267175	0.268528	0.0142097	0.264014	0.00898485
	70.0396		0.00108215	6.12576e-05	0.0682985	0.00237653	0.160776	0.00936828	0.268078	0.0132898	0.272689	0.0150922
	75.0425		0.00122622	0.000211064	0.0690332	0.00257197	0.166884	0.00608828	0.279395	0.0103934	0.288014	0.0309609
	80.0453		0.00128448	0.000130811	0.0716161	0.00423972	0.171533	0.0152847	0.285435	0.00876146	0.285622	0.00910906
	85.0481		0.00135041	7.41294e-05	0.0726626	0.0024349	0.174552	0.00500464	0.305478	0.0123928	0.304139	0.0325645
	90.051		0.00146782	0.000185707	0.0738519	0.00143785	0.178176	0.00712159	0.320326	0.0637139	0.305703	0.0124915
	95.0538		0.00150892	9.33605e-05	0.074513	0.00163038	0.181626	0.0110759	0.344598	0.036665	0.371846	0.14728
		298k
		MOL/KG
	%RH	tip3p
	0		0	0	0	0	0	0	0	0	0	0
	0.00318445		7.26e-08	1.232e-07	0.0179106	0.000508599	0.0533027	0.00232315	0.0812891	0.00644193	0.0824123	0.00484642
	0.0318442		9.807e-07	4.757e-07	0.0196362	0.000632579	0.0571475	0.00129846	0.105187	0.00111875	0.104587	0.00491119
	0.159215		4.1497e-06	7.001e-07	0.0239373	0.00192107	0.0654161	0.00229859	0.122701	0.00590037	0.119984	0.00340117
	0.318414		8.0815e-06	9.644e-07	0.0257391	0.00333429	0.0712584	0.00643146	0.12921	0.0024495	0.131364	0.0038232
	0.636764		1.62629e-05	2.1705e-06	0.0306329	0.00181244	0.0803116	0.00260598	0.141559	0.0031458	0.140995	0.00248077
	0.95505		2.39448e-05	1.7585e-06	0.032133	0.00313262	0.0837985	0.00596396	0.146405	0.00380223	0.146444	0.0106225
	1.27327		3.20535e-05	1.7152e-06	0.0334199	0.00238374	0.0848943	0.00317335	0.152043	0.00426288	0.152326	0.00691763
	1.59143		4.03166e-05	9.349e-07	0.0344322	0.00124328	0.0865715	0.00315479	0.153372	0.00462593	0.153747	0.00545015
	3.18127		7.81089e-05	3.2122e-06	0.0372609	0.00169896	0.0926151	0.00319282	0.16464	0.00255248	0.164681	0.00400806
	3.81676		9.53252e-05	2.7671e-06	0.0376401	0.00201308	0.0952283	0.00139431	0.166383	0.00305675	0.164804	0.00494128
	5.0005		0.000126189	1.8311e-06	0.0396933	0.000910324	0.0972645	0.00178204	0.171593	0.00297877	0.168552	0.00266946
	10.001		0.000270421	2.7799e-05	0.0435708	0.00063477	0.105236	0.00130335	0.183092	0.00505827	0.182797	0.00343666
	15.0015		0.000385205	1.77914e-05	0.0477836	0.00139383	0.113041	0.00154428	0.19169	0.00230251	0.193285	0.00559897
	20.002		0.000524879	2.66208e-05	0.0505701	0.00076169	0.118493	0.00439873	0.203566	0.00760908	0.203111	0.00434961
	25.0025		0.000672625	8.38579e-05	0.0530145	0.0018248	0.123807	0.00215515	0.209315	0.00362579	0.209569	0.00600328
	30.003		0.000807395	4.52788e-05	0.0553839	0.00142389	0.130952	0.00253115	0.218661	0.00791311	0.218881	0.00440584
	35.0035		0.00100548	8.00288e-05	0.0581599	0.0015969	0.134228	0.0048637	0.226845	0.00644196	0.224732	0.00460002
	40.004		0.0011292	8.75694e-05	0.0606436	0.00108143	0.140532	0.00112753	0.232194	0.00267994	0.234123	0.00336521
	45.0044		0.00128902	0.000101146	0.0620613	0.00147793	0.146023	0.00407636	0.242131	0.0035693	0.238806	0.00372681
	50.0049		0.00146627	0.000193488	0.0644056	0.00137934	0.149161	0.0032946	0.250556	0.00616442	0.249231	0.00542376
	55.0054		0.00159787	7.80668e-05	0.0655636	0.00303755	0.155422	0.0057082	0.256015	0.00648544	0.254372	0.00742906
	60.0059		0.00182792	0.000178737	0.0687336	0.00194636	0.159571	0.00359852	0.26156	0.00923221	0.261898	0.00759507
	65.0064		0.0020498	0.000400195	0.0691772	0.00253778	0.163453	0.00339273	0.270639	0.00659165	0.276404	0.0151251
	70.0068		0.00214701	9.69973e-05	0.071818	0.00224276	0.16879	0.00513273	0.28415	0.0152046	0.283116	0.0113409
	75.0073		0.00241786	0.000143804	0.0741076	0.00251681	0.172291	0.00683225	0.290771	0.0170501	0.288616	0.013215
	80.0078		0.00283541	0.000690736	0.0762724	0.00385648	0.178156	0.00935037	0.326319	0.0450514	0.322366	0.0739362
	85.0083		0.00323952	0.000892261	0.0773971	0.00324882	0.179572	0.00778709	0.317667	0.0169808	0.319259	0.0420833
	90.0087		0.00303831	0.000425609	0.0782849	0.00309308	0.190211	0.0188816	0.344595	0.0526307	0.351795	0.10289
	95.0092		0.00339279	0.000378377	0.0828036	0.00896913	0.192046	0.006316	0.503337	0.377158	0.366531	0.0637241
		313k
		MOL/KG
	%RH	tip3p
	0		0	0	0	0	0	0	0	0	0	0
	0.00136563		4.54e-08	5.74e-08	0.0159801	0.00225074	0.0471179	0.00342736	0.0601742	0.000876471	0.0580035	0.00605503
	0.0136562		5.176e-07	1.684e-07	0.0185853	0.000245929	0.0546949	0.00140408	0.0936533	0.00437979	0.0902119	0.00515128
	0.0682781		2.4608e-06	5.117e-07	0.0200613	0.000969205	0.0592212	0.00247514	0.108948	0.00280102	0.108668	0.00131107
	0.136549		5.0668e-06	5.586e-07	0.0221912	0.000751496	0.060473	0.00164004	0.115521	0.00421152	0.115265	0.00145044
	0.273071		1.00701e-05	1.4419e-06	0.0239698	0.000934391	0.0666212	0.00451997	0.12277	0.00565045	0.123656	0.00405482
	0.409566		1.52277e-05	2.6916e-06	0.0268733	0.00272922	0.0694618	0.00315912	0.127399	0.00313222	0.128112	0.00382799
	0.546033		2.01311e-05	1.4861e-06	0.0279987	0.0034626	0.0710776	0.00162461	0.132199	0.00403861	0.13254	0.00947605
	0.682473		2.56247e-05	2.1895e-06	0.0286622	0.0028226	0.0762829	0.00497307	0.135891	0.00136913	0.135995	0.00346007
	1.36426		5.01415e-05	3.952e-06	0.0323155	0.00280525	0.0821086	0.00469662	0.145974	0.00523368	0.148099	0.00441314
	1.63679		5.95941e-05	3.9164e-06	0.0339585	0.0027184	0.0835563	0.00345433	0.148566	0.00553505	0.150391	0.00675402
	5.0005		0.000187536	6.5059e-06	0.0386106	0.00194221	0.0949739	0.00351582	0.169428	0.000558065	0.167195	0.000449923
	10.001		0.000379857	1.45182e-05	0.0428568	0.0014567	0.10626	0.00123507	0.181474	0.00471577	0.181621	0.00498017
	15.0015		0.000599038	1.76343e-05	0.0471709	0.00139664	0.113323	0.00169162	0.193476	0.00292831	0.192353	0.00250279
	20.002		0.000794474	3.91857e-05	0.0505285	0.00143682	0.120373	0.00296937	0.201362	0.00462545	0.20254	0.00576258
	25.0025		0.0010222	6.14143e-05	0.0537591	0.00130055	0.12633	0.00303404	0.209602	0.00412365	0.208478	0.00836205
	30.0029		0.00122595	4.76744e-05	0.0557296	0.00144967	0.133036	0.00300619	0.219094	0.00448719	0.218733	0.00206555
	35.0034		0.00150935	0.000120942	0.0590807	0.000956971	0.138861	0.00256267	0.228008	0.002568	0.229389	0.00676553
	40.0039		0.00169343	6.60737e-05	0.0608764	0.00201901	0.142215	0.00544752	0.235369	0.00878888	0.233035	0.00618183
	45.0044		0.00202883	0.000174499	0.0628641	0.00151556	0.147956	0.00149256	0.246082	0.00331162	0.240535	0.00547844
	50.0048		0.00227634	0.000123911	0.065645	0.00143359	0.153562	0.00403653	0.251082	0.00606804	0.250082	0.0036231
	55.0053		0.00273603	0.000388011	0.068422	0.00171383	0.157713	0.00517963	0.263569	0.0113937	0.258963	0.00785486
	60.0057		0.00285576	0.000138981	0.0707516	0.00249289	0.164582	0.00526205	0.270119	0.0124139	0.26724	0.00705211
	65.0062		0.00320685	0.000229156	0.072161	0.00155143	0.167812	0.00501746	0.281126	0.014212	0.280404	0.0118256
	70.0066		0.00351462	0.000313796	0.0742019	0.00177891	0.176753	0.00399425	0.288825	0.00970841	0.290721	0.0180792
	75.0071		0.00379235	0.000607731	0.0767692	0.00120021	0.177466	0.00465849	0.309769	0.0175598	0.301447	0.0177367
	80.0075		0.00413491	0.000266247	0.0784929	0.00300765	0.185605	0.01251	0.319765	0.0172279	0.321684	0.0142912
	85.008		0.00474642	0.000785492	0.0807393	0.00320285	0.191002	0.0112716	0.395053	0.165389	0.347674	0.0724669
	90.0084		0.00495384	0.000551742	0.0832955	0.00576344	0.205523	0.00816737	0.355207	0.0391753	0.547517	0.227528
	95.0088		0.00526568	0.000323475	0.0859701	0.0033437	0.203128	0.0193574	0.520391	0.227404	0.515948	0.228526
		278k
		MOLECULES/UNITCELL
		tip3p
			0	0	0	0	0	0	0	0	0	0
			1.1e-05	9.2736e-06	1.04466	0.0287658	3.07335	0.0209454	5.56463	0.167684	5.60856	0.145222
			8.95e-05	2.08327e-05	1.39929	0.0626974	3.60437	0.0697163	6.7687	0.346215	6.69553	0.0943881
			0.000423	7.83199e-05	1.71701	0.14202	4.49457	0.254728	7.92986	0.207603	8.10815	0.33058
			0.0008325	0.000156429	1.87199	0.108538	4.74794	0.116033	8.448	0.213638	8.63734	0.149652
			0.0017195	0.000115733	2.0264	0.111939	5.10294	0.12132	8.8823	0.247772	8.9376	0.108106
			0.002533	0.000181698	2.11054	0.0445336	5.19525	0.135317	9.17103	0.333824	9.19294	0.360254
			0.00337	0.000264329	2.18856	0.0442367	5.3483	0.165287	9.38805	0.106958	9.39429	0.230701
			0.003766	0.000105385	2.16747	0.155886	5.39429	0.0894347	9.46444	0.365914	9.46678	0.28834
			0.004416	0.000408345	2.2608	0.0221008	5.45427	0.10665	9.64561	0.266325	9.68277	0.232862
			0.007517	0.00048571	2.42145	0.0605765	5.81999	0.0986736	10.1239	0.290631	10.0311	0.28194
			0.008451	0.000330009	2.48141	0.0773102	5.98865	0.126666	10.3905	0.232358	10.1869	0.324902
			0.0107715	0.00176698	2.60082	0.0995473	6.08354	0.102967	10.6164	0.258755	10.3778	0.109194
			0.011086	0.00088396	2.56422	0.0888053	6.17058	0.135288	10.7102	0.375829	10.6456	0.354067
			0.0152295	0.00121617	2.72697	0.0453539	6.5724	0.198424	11.0575	0.256217	11.1293	0.198992
			0.019627	0.00305529	2.8701	0.0340444	6.77307	0.138059	11.5044	0.201391	11.484	0.425333
			0.0227165	0.00102997	2.95354	0.0722021	7.06198	0.0680338	11.8599	0.228062	11.9364	0.306665
			0.027587	0.0019545	3.06218	0.138287	7.32794	0.184151	12.1009	0.427641	12.3162	0.478166
			0.031359	0.00162548	3.2272	0.0927705	7.60162	0.170476	12.6911	0.163649	12.764	0.347249
			0.035707	0.0026466	3.35248	0.0843319	7.79892	0.193537	13.038	0.383489	13.0037	0.482691
			0.042596	0.00678461	3.36267	0.0625784	8.05305	0.183329	13.3449	0.284005	13.3559	0.450562
			0.046931	0.00393459	3.50376	0.0761938	8.35429	0.312244	13.7603	0.26489	13.6217	0.129197
			0.0500225	0.00296235	3.53811	0.0708167	8.50038	0.329701	14.282	0.426408	13.9692	0.557474
			0.054383	0.00574308	3.68581	0.117569	8.65765	0.146689	14.7002	0.777887	14.453	0.491862
			0.0595875	0.00337309	3.75642	0.130709	8.82722	0.514355	14.6755	0.72753	14.9279	0.826197
			0.067521	0.011622	3.79682	0.141458	9.16255	0.33427	15.2951	0.568974	15.7669	1.69491
			0.070729	0.007203	3.93889	0.233184	9.41779	0.839187	15.6257	0.479633	15.6359	0.498661
			0.074359	0.00408187	3.99644	0.13392	9.58357	0.274774	16.7229	0.678423	16.6496	1.7827
			0.0808245	0.0102258	4.06185	0.0790817	9.78252	0.391002	17.5357	3.48792	16.7352	0.683826
			0.0830875	0.00514081	4.09821	0.0896711	9.97196	0.60811	18.8645	2.00717	20.3561	8.06263
		298k
		MOLECULES/UNITCELL
		tip3p
			0	0	0	0	0	0	0	0	0	0
			4e-06	6.7823e-06	0.985085	0.027973	2.92652	0.12755	4.45005	0.352653	4.51154	0.26531
			5.4e-05	2.61916e-05	1.07999	0.0347918	3.13761	0.0712902	5.7583	0.0612445	5.72544	0.268855
			0.0002285	3.85487e-05	1.31655	0.105659	3.59159	0.126201	6.71708	0.323007	6.56836	0.186192
			0.000445	5.31037e-05	1.41565	0.183386	3.91236	0.353112	7.07341	0.134094	7.19131	0.209295
			0.0008955	0.000119516	1.68481	0.099684	4.40941	0.143078	7.74943	0.172212	7.71855	0.135806
			0.0013185	9.68297e-05	1.76732	0.172294	4.60086	0.327444	8.01474	0.208147	8.01684	0.581512
			0.001765	9.44458e-05	1.8381	0.131106	4.66102	0.174229	8.32339	0.233365	8.33885	0.378695
			0.00222	5.14782e-05	1.89377	0.0683801	4.75311	0.17321	8.39614	0.25324	8.41664	0.29836
			0.004301	0.000176879	2.04935	0.0934427	5.08492	0.175298	9.01298	0.139731	9.01522	0.219415
			0.005249	0.000152368	2.07021	0.11072	5.2284	0.076553	9.10837	0.167337	9.02194	0.270503
			0.0069485	0.000100827	2.18313	0.0500678	5.34019	0.0978407	9.39361	0.163068	9.22711	0.146136
			0.0148905	0.00153073	2.39639	0.0349124	5.77786	0.0715587	10.0231	0.276907	10.007	0.188134
			0.021211	0.000979666	2.6281	0.0766604	6.2064	0.0847867	10.4938	0.126047	10.5811	0.306507
			0.028902	0.00146585	2.78136	0.0418929	6.50569	0.241507	11.1439	0.416547	11.119	0.238113
			0.0370375	0.00461756	2.9158	0.100364	6.79746	0.118326	11.4586	0.198489	11.4726	0.32864
			0.0444585	0.00249324	3.04612	0.0783141	7.18978	0.13897	11.9702	0.433191	11.9823	0.241191
			0.055366	0.00440672	3.1988	0.0878297	7.36962	0.267036	12.4183	0.352655	12.3026	0.251821
			0.0621785	0.00482193	3.3354	0.0594789	7.71575	0.0619055	12.7111	0.146709	12.8167	0.184223
			0.0709785	0.0055695	3.41337	0.0812859	8.01721	0.223808	13.2551	0.195396	13.0731	0.204018
			0.080739	0.0106543	3.54231	0.0758635	8.18953	0.180886	13.7163	0.337462	13.6438	0.296916
			0.0879855	0.00429868	3.606	0.167065	8.53329	0.313402	14.0152	0.355036	13.9252	0.406692
			0.100653	0.009842	3.78035	0.10705	8.76103	0.197572	14.3187	0.505404	14.3372	0.41578
			0.11287	0.0220364	3.80475	0.139578	8.97422	0.186274	14.8157	0.36085	15.1313	0.828002
			0.118223	0.00534107	3.94999	0.123352	9.2672	0.281806	15.5553	0.832352	15.4988	0.620842
			0.133137	0.00791847	4.07592	0.138424	9.45944	0.375117	15.9178	0.933383	15.7998	0.723436
			0.15613	0.0380348	4.19498	0.212106	9.78145	0.513371	17.8638	2.46627	17.6474	4.04752
			0.178381	0.0491316	4.25684	0.178685	9.8592	0.427541	17.3902	0.929588	17.4773	2.30379
			0.167302	0.0234358	4.30567	0.170119	10.4433	1.03667	18.8643	2.88119	19.2585	5.63257
			0.186821	0.020835	4.5542	0.493302	10.5441	0.346772	27.5544	20.6469	20.0652	3.48848
		313k
		MOLECULES/UNITCELL
		tip3p
			0	0	0	0	0	0	0	0	0	0
			2.5e-06	3.1623e-06	0.878903	0.123791	2.58695	0.188175	3.29414	0.0479811	3.17531	0.331474
			2.85e-05	9.2736e-06	1.02219	0.0135261	3.00296	0.0770892	5.12691	0.239765	4.93851	0.281999
			0.0001355	2.8178e-05	1.10337	0.0533063	3.25147	0.135894	5.96419	0.153337	5.94889	0.0717724
			0.000279	3.07571e-05	1.22052	0.0413323	3.3202	0.0900443	6.32401	0.230553	6.31003	0.0794019
			0.0005545	7.93977e-05	1.31834	0.0513915	3.65775	0.248164	6.72087	0.309325	6.76933	0.221975
			0.0008385	0.000148209	1.47803	0.150107	3.81372	0.173448	6.97425	0.171469	7.01327	0.209557
			0.0011085	8.18291e-05	1.53993	0.190443	3.90243	0.0891974	7.23703	0.221088	7.25569	0.518752
			0.001411	0.000120565	1.57642	0.155243	4.18822	0.273041	7.43914	0.074951	7.44485	0.189417
			0.002761	0.000217614	1.77735	0.154289	4.50808	0.257862	7.99115	0.28651	8.10743	0.241591
			0.0032815	0.000215652	1.86772	0.149512	4.58756	0.189656	8.13302	0.303008	8.23292	0.369738
			0.0103265	0.00035824	2.12358	0.106822	5.21443	0.193032	9.27509	0.0305504	9.15286	0.0246304
			0.0209165	0.000799435	2.35712	0.0801183	5.83411	0.0678099	9.93449	0.258157	9.94254	0.272632
			0.0329855	0.000971017	2.5944	0.0768152	6.22186	0.0928765	10.5916	0.160306	10.5301	0.137012
			0.043747	0.00215772	2.77907	0.0790251	6.60895	0.16303	11.0233	0.253213	11.0878	0.315464
			0.0562865	0.00338173	2.95675	0.0715304	6.93597	0.16658	11.4744	0.225743	11.4128	0.457768
			0.067506	0.00262515	3.06513	0.0797319	7.30418	0.165051	11.994	0.245644	11.9742	0.113076
			0.083111	0.00665955	3.24944	0.0526334	7.624	0.1407	12.4819	0.140581	12.5575	0.370369
			0.0932475	0.00363829	3.3482	0.111046	7.80813	0.29909	12.8849	0.481134	12.7572	0.338415
			0.111715	0.00960865	3.45752	0.0833557	8.12333	0.0819474	13.4714	0.18129	13.1677	0.299909
			0.125344	0.00682305	3.61047	0.0788473	8.43113	0.221621	13.7451	0.332185	13.6903	0.198341
			0.150657	0.0213655	3.76321	0.0942609	8.65904	0.284381	14.4287	0.623729	14.1765	0.430003
			0.15725	0.00765286	3.89134	0.137109	9.0362	0.288907	14.7873	0.67958	14.6296	0.386057
			0.176583	0.0126183	3.96886	0.0853285	9.2135	0.275478	15.3898	0.778017	15.3503	0.647372
			0.193529	0.0172789	4.0811	0.0978401	9.70442	0.219299	15.8113	0.531472	15.9151	0.989721
			0.208822	0.0334642	4.22231	0.0660117	9.74356	0.255769	16.9578	0.961286	16.5022	0.97097
			0.227686	0.0146606	4.31711	0.165421	10.1904	0.686846	17.5051	0.943113	17.6101	0.782352
			0.261358	0.0432525	4.44066	0.176157	10.4868	0.618856	21.6266	9.05398	19.0329	3.96709
			0.272779	0.0303812	4.58125	0.316989	11.284	0.44842	19.4453	2.14459	29.973	12.4557
			0.28995	0.0178118	4.72836	0.183903	11.1525	1.06279	28.488	12.4489	28.2448	12.5103

## Sheet: energy_decomp
		Bulk, 1% defects										Surface, 4% defects
		Adsorbate-Adsorbate										Adsorbate-Adsorbate
		Total (eV)	vdW (eV)	Coul (eV)	Total (+/-)	vdW (+/-)	Coul (+/-)					Total (eV)	vdW (eV)	Coul (eV)	Total (+/-)	vdW (+/-)	Coul (+/-)
		0	0	0	0	0	0					-0.000102959	-0.000102021	-9.38201e-07	1.79887e-06	1.93387e-06	6.23745e-07
		0.0983881	-0.0025252	0.100913	0.000444854	1.19071e-05	0.000454501					0.0869616	0.00201163	0.0849499	0.00326353	0.000229307	0.00304648
		0.0982633	-0.00252317	0.100786	0.000175021	5.97511e-06	0.000177345					0.0851642	0.00222466	0.0829396	0.00315825	0.00035281	0.00319546
		0.0982914	-0.00252789	0.100819	0.000199697	8.75e-06	0.000192247					0.0827735	0.00326536	0.0795081	0.00080202	0.000145756	0.000910142
		0.097974	-0.00251229	0.100486	0.000456798	1.19687e-05	0.000459129					0.0789227	0.00436372	0.074559	0.00441583	0.00116389	0.00557035
		0.0983339	-0.00252047	0.100854	0.000318301	1.50184e-05	0.000330066					0.0693159	0.00690511	0.0624108	0.0068783	0.00190771	0.00877812
		0.0982848	-0.0025182	0.100803	0.000443602	1.2501e-05	0.000453532					0.0633799	0.00852852	0.0548514	0.0130226	0.00364079	0.0166555
		0.0984168	-0.00252286	0.10094	0.000393457	1.25847e-05	0.000402378					0.0487993	0.0125404	0.0362589	0.00941462	0.00279598	0.0121727
		0.0982146	-0.00252218	0.100737	0.000426864	1.74608e-05	0.00044177					0.0438684	0.0139305	0.0299379	0.0158681	0.00439325	0.0202334
		0.0981298	-0.00252341	0.100653	0.00025547	1.49307e-05	0.000258232					0.00882166	0.0234972	-0.0146755	0.0084654	0.00189354	0.0103424
		0.0984059	-0.0025274	0.100933	0.000195528	1.34968e-05	0.000189521					-4.14618e-05	0.0255704	-0.0256118	0.0195638	0.00594563	0.0254932
		0.09823	-0.00251993	0.10075	0.000346081	5.07482e-06	0.000349872					-0.0253849	0.0326996	-0.0580844	0.0087241	0.00214464	0.0108089
		0.0982765	-0.00251833	0.100795	0.000350413	1.27906e-05	0.000361148					-0.101977	0.0534797	-0.155457	0.0260091	0.00624303	0.0322236
		0.0983914	-0.00251785	0.100909	0.000322337	9.98301e-06	0.000327676					-0.171763	0.0721922	-0.243955	0.0376168	0.0109991	0.048567
		0.0983051	-0.00252012	0.100825	0.000284692	1.01128e-05	0.000290491					-0.238648	0.0911252	-0.329773	0.0184242	0.00608532	0.0244365
		0.0982809	-0.00252196	0.100803	0.000289242	6.69431e-06	0.000288888					-0.269746	0.0990898	-0.368836	0.0290712	0.00839633	0.0374002
		0.0981785	-0.00251919	0.100698	0.000174554	8.34301e-06	0.000181268					-0.308802	0.109468	-0.41827	0.0201124	0.00570386	0.0257347
		0.0982611	-0.00251896	0.10078	0.000442144	6.64891e-06	0.000443127					-0.336958	0.118031	-0.454989	0.0241384	0.00686751	0.0308639
		0.0982077	-0.00252274	0.10073	0.000379277	5.86216e-06	0.000383397					-0.386298	0.131047	-0.517345	0.0298807	0.00741364	0.0367601
		0.0982239	-0.002513	0.100737	0.000364961	1.16471e-05	0.00035696					-0.396128	0.133789	-0.529917	0.0526238	0.01388	0.0663127
		0.0982688	-0.00252241	0.100791	0.000392509	1.28128e-05	0.000395249					-0.432087	0.142725	-0.574812	0.0133019	0.00476682	0.0179764
		0.0983069	-0.00252516	0.100832	0.000266556	1.20054e-05	0.000273288					-0.465467	0.151715	-0.617182	0.0377933	0.0110065	0.0487925
		0.0982048	-0.00251804	0.100723	0.000247183	1.20947e-05	0.000242634					-0.48709	0.158034	-0.645125	0.0197386	0.00622504	0.0258918
		0.0984744	-0.00252324	0.100998	0.000205681	7.18969e-06	0.000209259					-0.52979	0.16984	-0.69963	0.0356224	0.00718193	0.0425391
		0.0982836	-0.00251851	0.100802	0.000532596	1.92003e-05	0.00054988					-0.544516	0.174448	-0.718965	0.0356326	0.0118009	0.0473121
		0.0983629	-0.00252144	0.100884	0.000359832	1.18242e-05	0.000360395					-0.573284	0.181242	-0.754526	0.0319335	0.00775701	0.0396293
		0.0983651	-0.00252302	0.100888	0.000394385	1.54544e-05	0.000399392					-0.570207	0.180679	-0.750885	0.0457568	0.0135574	0.0590612
		0.0984644	-0.00252096	0.100985	0.000524493	6.00328e-06	0.000525062					-0.60082	0.188371	-0.789191	0.0640366	0.0177435	0.0816975
		0.0983191	-0.00252294	0.100842	0.00033054	8.71847e-06	0.000327387					-0.622751	0.195993	-0.818744	0.0565606	0.0157942	0.0721382
		0.0982367	-0.00251974	0.100756	0.000206826	9.06704e-06	0.000211925					-0.66036	0.2044	-0.86476	0.0713591	0.0191796	0.0902364
		Host-Adsorbate										Host-Adsorbate
		Total (eV)	vdW (eV)	Coul (eV)	Total (+/-)	vdW (+/-)	Coul (+/-)					Total (eV)	vdW (eV)	Coul (eV)	Total (+/-)	vdW (+/-)	Coul (+/-)
		0	0	0	0	0	0					-0.0360149	-0.035323	-0.000691902	0.000221277	0.00021192	2.29295e-05
		-17.0735	2.66579	-19.7393	0.0059279	0.00645567	0.0112654					-3.90833	0.402735	-4.31107	0.0381524	0.00470628	0.0427768
		-17.0725	2.66813	-19.7406	0.0131195	0.0158231	0.0167394					-3.90156	0.402599	-4.30416	0.0326771	0.00303149	0.0353435
		-17.0736	2.67068	-19.7442	0.0104737	0.0114528	0.0159516					-3.92223	0.404463	-4.32669	0.000945502	0.00230583	0.00259291
		-17.0758	2.67058	-19.7464	0.0127593	0.00899294	0.00602987					-3.92563	0.404389	-4.33002	0.00303882	0.00231588	0.00398256
		-17.0739	2.67478	-19.7487	0.00642205	0.0128156	0.0176618					-3.93324	0.403191	-4.33643	0.00588256	0.00105559	0.00637005
		-17.0712	2.67187	-19.743	0.0142143	0.0168808	0.01839					-3.93909	0.40254	-4.34163	0.0100104	0.00319001	0.00717403
		-17.0767	2.6687	-19.7454	0.0127227	0.00908601	0.0144329					-3.95083	0.402018	-4.35285	0.00913862	0.000981586	0.00953102
		-17.0699	2.66892	-19.7388	0.00823702	0.0165484	0.0126885					-3.95599	0.401053	-4.35704	0.0127218	0.00198679	0.0115433
		-17.0683	2.67171	-19.74	0.0061711	0.0165413	0.0116788					-3.9839	0.399029	-4.38292	0.00435453	0.00221981	0.00479022
		-17.0762	2.66716	-19.7434	0.0095155	0.0182484	0.0194409					-3.98943	0.398269	-4.3877	0.0171406	0.00302042	0.0191113
		-17.0708	2.6765	-19.7473	0.0101765	0.0119613	0.0106221					-4.0116	0.395821	-4.40743	0.00513226	0.00271183	0.00561628
		-17.071	2.66847	-19.7395	0.0119617	0.0150301	0.0207505					-4.06822	0.389645	-4.45786	0.0186593	0.00372412	0.0161563
		-17.0714	2.67266	-19.7441	0.0073243	0.0142899	0.014017					-4.11484	0.384764	-4.49961	0.0253977	0.00402666	0.0234053
		-17.0719	2.67015	-19.7421	0.00906482	0.0128098	0.0195599					-4.15895	0.378929	-4.53788	0.0109729	0.00360609	0.0101258
		-17.0769	2.66797	-19.7448	0.0123832	0.0152203	0.0259449					-4.17975	0.374927	-4.55468	0.01703	0.00177012	0.0184068
		-17.0697	2.67024	-19.7399	0.0098724	0.00596286	0.00916897					-4.20036	0.372036	-4.5724	0.0113917	0.00157738	0.0109642
		-17.0778	2.67222	-19.75	0.010748	0.00940274	0.00984456					-4.21967	0.370514	-4.59018	0.0148541	0.00529091	0.0120101
		-17.0756	2.66544	-19.7411	0.00704679	0.0182443	0.0219671					-4.24818	0.366947	-4.61513	0.0138293	0.00745278	0.00876733
		-17.0758	2.6736	-19.7494	0.00956041	0.0044325	0.0114667					-4.25249	0.363374	-4.61587	0.0357494	0.00637723	0.0304928
		-17.0746	2.66638	-19.7409	0.0175229	0.0113296	0.0171307					-4.27332	0.359805	-4.63312	0.0122859	0.00309141	0.0108532
		-17.0731	2.67389	-19.747	0.012346	0.0152404	0.0159802					-4.29141	0.356232	-4.64764	0.0205261	0.00263155	0.0204091
		-17.0729	2.67155	-19.7444	0.0099254	0.0159235	0.0244751					-4.30272	0.354338	-4.65705	0.0157947	0.00469401	0.0115707
		-17.0735	2.66671	-19.7402	0.0084993	0.0115867	0.00997924					-4.32276	0.351321	-4.67408	0.0210204	0.0060868	0.0170423
		-17.0697	2.66919	-19.7389	0.0102283	0.00944929	0.0127354					-4.33666	0.350114	-4.68677	0.0281121	0.00452807	0.0245081
		-17.0754	2.67097	-19.7464	0.00800015	0.00639881	0.00931439					-4.34981	0.346609	-4.69642	0.00836053	0.00465673	0.00573572
		-17.0714	2.67033	-19.7417	0.00814944	0.0051454	0.0104953					-4.34816	0.347447	-4.69561	0.0195218	0.00699824	0.0178014
		-17.074	2.67236	-19.7464	0.00730679	0.0136131	0.00829823					-4.36336	0.343229	-4.70659	0.0410743	0.00827229	0.0371741
		-17.0743	2.66752	-19.7418	0.0108495	0.0174216	0.0105508					-4.37404	0.342233	-4.71627	0.0264704	0.00500855	0.0238048
		-17.0697	2.66845	-19.7382	0.0089214	0.014687	0.00984857					-4.39462	0.336626	-4.73125	0.0343522	0.00893935	0.0267638
